# Supplementary material
Source: PubMed Central journal article supplement (PMC3605033)
Supplement: NIHMS444574-supplement-supplementary_table_1.pdf [file NIHMS444574-supplement-supplementary_table_1.pdf]

# Genome-wide Association Study Identifies Multiple Loci Influencing Human Serum Metabolite Levels

Johannes Kettunen<sup>1,2,37</sup>, Taru Tukiainen<sup>1,3,4,5,37</sup>, Antti-Pekka Sarin<sup>1,2</sup>, Alfredo Ortega-Alonso<sup>1,6</sup>, Emmi Tikkanen<sup>1,2</sup>, Leo-Pekka Lyytikäinen<sup>7</sup>, Antti J. Kangas<sup>5</sup>, Pasi Soininen<sup>5,8</sup>, Peter Würtz<sup>1,3,5</sup>, Kaisa Silander<sup>1,2</sup>, Danielle M. Dick<sup>9</sup>, Richard J. Rose<sup>6,10</sup>, Markku J. Savolainen<sup>11,12</sup>, Jorma Viikari<sup>13</sup>, Mika Kähönen<sup>14</sup>, Terho Lehtimäki<sup>7</sup>, Kirsi H. Pietiläinen<sup>1,15,16</sup>, Michael Inouye<sup>17,18</sup>, Mark I. McCarthy<sup>19,20</sup>, Antti Jula<sup>2</sup>, Johan Eriksson<sup>21,22,23,24</sup>, Olli T. Raitakari<sup>25,26</sup>, Veikko Salomaa<sup>2</sup>, Jaakko Kaprio<sup>1,6,27</sup>, Marjo-Riitta Järvelin<sup>3,12,28,29,30</sup>, Leena Peltonen<sup>36</sup>, Markus Perola<sup>1,2,31</sup>, Nelson B. Freimer<sup>32</sup>, Mika Ala-Korpela<sup>5,8,11,12</sup>, Aarno Palotie<sup>1,33,34,35</sup> and Samuli Ripatti<sup>1,2,33,#</sup>

1. Institute for Molecular Medicine Finland (FIMM), University of Helsinki, Helsinki, Finland
2. Department of Chronic Disease Prevention, National Institute for Health and Welfare, Helsinki, Finland
3. Department of Epidemiology and Biostatistics, Imperial College London, London, United Kingdom
4. Department of Biomedical Engineering and Computational Science, School of Science, Aalto University, Espoo, Finland
5. Computational Medicine Research Group, Institute of Clinical Medicine, University of Oulu and Biocenter Oulu, Oulu, Finland
6. Department of Public Health, University of Helsinki, Helsinki, Finland
7. Department of Clinical Chemistry, University of Tampere and Tampere University Hospital, Tampere, Finland
8. NMR Metabonomics Laboratory, Department of Biosciences, University of Eastern Finland, Kuopio, Finland
9. Virginia Institute for Psychiatric and Behavioral Genetics, Virginia Commonwealth University, Richmond, Virginia, USA
10. Department of Psychological and Brain Sciences, Indiana University, Bloomington, Indiana, USA
11. Department of Internal Medicine, Clinical Research Center, University of Oulu, Oulu, Finland
12. Biocenter Oulu, University of Oulu, Oulu, Finland
13. Department of Medicine, University of Turku and Turku University Hospital, Turku, Finland
14. Department of Clinical Physiology, University of Tampere and Tampere University Hospital, Tampere, Finland
15. Department of Medicine, Division of Internal Medicine, Obesity Research Unit, Helsinki University Central Hospital, Helsinki, Finland
16. Department of Public Health, Hjelt Institute, University of Helsinki, Helsinki, Finland
17. Walter and Eliza Hall Institute of Medical Research, 1G Royal Parade, Parkville, Victoria, Australia
18. Department of Medical Biology, University of Melbourne, Parkville, Victoria, Australia
19. Oxford Centre for Diabetes, Endocrinology and Metabolism, Churchill Hospital, Oxford, UK
20. Wellcome Trust Centre for Human Genetics, University of Oxford, Headington, Oxford, UK
21. Unit of Chronic Disease Epidemiology and Prevention, National Institute for Health and Welfare, Helsinki, Finland
22. Department of General Practice and Primary Health Care, University of Helsinki, Helsinki, Finland
23. Unit of General Practice, Helsinki University Central Hospital, Helsinki, Finland
24. Folkhälsan Research Centre, Helsinki, Finland
25. Research Centre of Applied and Preventive Cardiovascular Medicine, University of Turku, Turku, Finland
26. Department of Clinical Physiology, Turku University Hospital, Turku, Finland
27. Department of Mental Health and Alcohol Abuse Services, National Institute for Health and Welfare, Helsinki, Finland
28. MRC Health Protection Agency (HPA) Centre for Environment and Health, Imperial College London, London UK
29. Institute of Health Sciences, University of Oulu, Oulu, Finland
30. Department of Lifecourse and Services, National Institute of Health and Welfare, Oulu, Finland
31. Estonian Genome Centre, University of Tartu, Tartu, Estonia
32. Center for Neurobehavioral Genetics, Semel Institute for Neuroscience and Human Behavior, University of California Los Angeles, Los Angeles, CA, USA
33. Human Genetics, Wellcome Trust Sanger Institute, Wellcome Trust Genome Campus, Hinxton, UK
34. Department of Medical Genetics, University of Helsinki and the Helsinki University Hospital, Helsinki, Finland
35. The Broad Institute of MIT and Harvard, Cambridge, Massachusetts, USA
36. Deceased.
37. These authors contributed equally to this work.

# Contact: samuli.ripatti@fimm.fi,

## **Topics in this supplement:**

**Supplementary Tables**

**Supplementary Figures**

**Supplementary Note**

- **Study samples and phenotypes**
- **Study descriptions**
- **Quantitative serum NMR metabolomics**
- **Conditional analyses**
- **Validation by sequencing**
- **Heritability estimates**
- **References**

## Supplementary Tables

**Supplementary Table 1.** Metabolite abbreviations and sample sizes used for the analyses for all metabolic traits used in this study.

| Abbreviation | Full metabolite name                              | N (NFBC) | N (YF) | N (HBCS) | N (GenMets) | N (DILGOM) | N (Total) |
|--------------|---------------------------------------------------|----------|--------|----------|-------------|------------|-----------|
| AcAcO        | Acetoacetate                                      | 4677     | 1889   | 701      | 568         | 441        | 8276      |
| AcO          | Acetate                                           | 4703     | 1904   | 708      | 572         | 441        | 8328      |
| Ala          | Alanine                                           | 4703     | 1904   | 708      | 572         | 442        | 8329      |
| Alb          | Albumin                                           | 4627     | 1889   | 696      | 562         | 441        | 8215      |
| bOHBuO       | 3-hydroxybutyrate                                 | 4694     | 1900   | 704      | 0           | 439        | 7737      |
| Cit          | Citrate                                           | 4589     | 1868   | 659      | 563         | 441        | 8120      |
| Crea         | Creatinine                                        | 4698     | 1901   | 708      | 571         | 443        | 8321      |
| DHA          | 22:6, docosahexaenoic acid (DHA)                  | 4547     | 1871   | 619      | 542         | 432        | 8011      |
| Est-C        | Esterified cholesterol                            | 4523     | 1866   | 681      | 549         | 433        | 8052      |
| FAw3         | Omega-3 fatty acids                               | 4503     | 1874   | 682      | 548         | 432        | 8039      |
| FAw67        | Omega-6 and -7 fatty acids                        | 4504     | 1873   | 682      | 548         | 432        | 8039      |
| FAw9S        | Omega-9 and saturated fatty acids                 | 4504     | 1873   | 682      | 548         | 432        | 8039      |
| Free-C       | Free cholesterol                                  | 4523     | 1866   | 681      | 549         | 433        | 8052      |
| Glc          | Glucose                                           | 4700     | 1904   | 708      | 572         | 441        | 8325      |
| Gln          | Glutamine                                         | 4370     | 1858   | 261      | 562         | 441        | 7492      |
| GloI         | Glycerol                                          | 4698     | 1901   | 703      | 0           | 439        | 7741      |
| Gp           | Glycoprotein acetyls, mainly a1-acid glycoprotein | 4703     | 1904   | 708      | 572         | 442        | 8329      |
| HDL-C        | Total cholesterol in HDL                          | 4627     | 1889   | 696      | 562         | 441        | 8215      |
| His          | Histidine                                         | 4700     | 1898   | 706      | 572         | 442        | 8318      |
| IDL-C        | Total cholesterol in IDL                          | 4627     | 1889   | 696      | 562         | 441        | 8215      |
| IDL-FC       | Free cholesterol in IDL                           | 4627     | 1889   | 696      | 562         | 441        | 8215      |
| IDL-L        | Total lipids in IDL                               | 4627     | 1889   | 696      | 562         | 441        | 8215      |
| IDL-P        | Concentration of IDL particles                    | 4627     | 1889   | 696      | 562         | 441        | 8215      |
| IDL-PL       | Phospholipids in IDL                              | 4627     | 1889   | 696      | 562         | 441        | 8215      |
| IDL-TG       | Triglycerides in IDL                              | 4627     | 1889   | 696      | 562         | 441        | 8215      |
| Ile          | Isoleucine                                        | 4703     | 1904   | 708      | 572         | 441        | 8328      |
| LA           | 18:2, linoleic acid (LA)                          | 4554     | 1879   | 683      | 549         | 433        | 8098      |
| Lac          | Lactate                                           | 4687     | 1901   | 707      | 570         | 441        | 8306      |
| LDL-C        | Total cholesterol in LDL                          | 4627     | 1889   | 696      | 562         | 441        | 8215      |
| Leu          | Leucine                                           | 4703     | 1902   | 708      | 572         | 441        | 8326      |
| L-HDL-C      | Total cholesterol in large HDL                    | 4627     | 1889   | 696      | 562         | 441        | 8215      |
| L-HDL-CE     | Cholesterol esters in large HDL                   | 4627     | 1889   | 696      | 562         | 441        | 8215      |
| L-HDL-FC     | Free cholesterol in large HDL                     | 4627     | 1889   | 696      | 562         | 441        | 8215      |
| L-HDL-L      | Total lipids in large HDL                         | 4627     | 1889   | 696      | 562         | 441        | 8215      |
| L-HDL-P      | Concentration of large HDL particles              | 4627     | 1889   | 696      | 562         | 441        | 8215      |
| L-HDL-PL     | Phospholipids in large HDL                        | 4627     | 1889   | 696      | 562         | 441        | 8215      |

| Abbreviation | Full metabolite name                        | N (NFBC) | N (YF) | N (HBCS) | N (GenMets) | N (DILGOM) | N (Total) |
|--------------|---------------------------------------------|----------|--------|----------|-------------|------------|-----------|
| L-LDL-C      | Total cholesterol in large LDL              | 4627     | 1889   | 696      | 562         | 441        | 8215      |
| L-LDL-CE     | Cholesterol esters in large LDL             | 4627     | 1889   | 696      | 562         | 441        | 8215      |
| L-LDL-FC     | Free cholesterol in large LDL               | 4627     | 1889   | 696      | 562         | 441        | 8215      |
| L-LDL-L      | Total lipids in large LDL                   | 4627     | 1889   | 696      | 562         | 441        | 8215      |
| L-LDL-P      | Concentration of large LDL particles        | 4627     | 1889   | 696      | 562         | 441        | 8215      |
| L-LDL-PL     | Phospholipids in large LDL                  | 4627     | 1889   | 696      | 562         | 441        | 8215      |
| L-VLDL-C     | Total cholesterol in large VLDL             | 4627     | 1889   | 696      | 562         | 441        | 8215      |
| L-VLDL-CE    | Cholesterol esters in large VLDL            | 4627     | 1889   | 696      | 562         | 441        | 8215      |
| L-VLDL-FC    | Free cholesterol in large VLDL              | 4627     | 1889   | 696      | 562         | 441        | 8215      |
| L-VLDL-L     | Total lipids in large VLDL                  | 4627     | 1889   | 696      | 562         | 441        | 8215      |
| L-VLDL-P     | Concentration of large VLDL particles       | 4627     | 1889   | 696      | 562         | 441        | 8215      |
| L-VLDL-PL    | Phospholipids in large VLDL                 | 4627     | 1889   | 696      | 562         | 441        | 8215      |
| L-VLDL-TG    | Triglycerides in large VLDL                 | 4627     | 1889   | 696      | 562         | 441        | 8215      |
| M-HDL-C      | Total cholesterol in medium HDL             | 4627     | 1889   | 696      | 562         | 441        | 8215      |
| M-HDL-CE     | Cholesterol esters in medium HDL            | 4627     | 1889   | 696      | 562         | 441        | 8215      |
| M-HDL-FC     | Free cholesterol in medium HDL              | 4627     | 1889   | 696      | 562         | 441        | 8215      |
| M-HDL-L      | Total lipids in medium HDL                  | 4627     | 1889   | 696      | 562         | 441        | 8215      |
| M-HDL-P      | Concentration of medium HDL particles       | 4627     | 1889   | 696      | 562         | 441        | 8215      |
| M-HDL-PL     | Phospholipids in medium HDL                 | 4627     | 1889   | 696      | 562         | 441        | 8215      |
| M-LDL-C      | Total cholesterol in medium LDL             | 4627     | 1889   | 696      | 562         | 441        | 8215      |
| M-LDL-CE     | Cholesterol esters in medium LDL            | 4627     | 1889   | 696      | 562         | 441        | 8215      |
| M-LDL-L      | Total lipids in medium LDL                  | 4627     | 1889   | 696      | 562         | 441        | 8215      |
| M-LDL-P      | Concentration of medium LDL particles       | 4627     | 1889   | 696      | 562         | 441        | 8215      |
| M-LDL-PL     | Phospholipids in medium LDL                 | 4627     | 1889   | 696      | 562         | 441        | 8215      |
| MobCH        | Double bond protons of mobile lipids        | 4703     | 1904   | 708      | 572         | 442        | 8329      |
| MobCH2       | CH2 groups of mobile lipids                 | 4703     | 1904   | 708      | 572         | 443        | 8330      |
| MobCH3       | CH3 groups of mobile lipids                 | 4703     | 1904   | 708      | 572         | 443        | 8330      |
| M-VLDL-C     | Total cholesterol in medium VLDL            | 4627     | 1889   | 696      | 562         | 441        | 8215      |
| M-VLDL-CE    | Cholesterol esters in medium VLDL           | 4627     | 1889   | 696      | 562         | 441        | 8215      |
| M-VLDL-FC    | Free cholesterol in medium VLDL             | 4627     | 1889   | 696      | 562         | 441        | 8215      |
| M-VLDL-L     | Total lipids in medium VLDL                 | 4627     | 1889   | 696      | 562         | 441        | 8215      |
| M-VLDL-P     | Concentration of medium VLDL particles      | 4627     | 1889   | 696      | 562         | 441        | 8215      |
| M-VLDL-PL    | Phospholipids in medium VLDL                | 4627     | 1889   | 696      | 562         | 441        | 8215      |
| M-VLDL-TG    | Triglycerides in medium VLDL                | 4627     | 1889   | 696      | 562         | 441        | 8215      |
| PC           | Phosphatidylcholine and other cholines      | 4562     | 1833   | 593      | 476         | 431        | 7895      |
| Phe          | Phenylalanine                               | 4698     | 1902   | 707      | 572         | 442        | 8321      |
| PUFA         | Other polyunsaturated fatty acids than 18:2 | 4474     | 1855   | 683      | 546         | 433        | 7991      |
| Pyr          | Pyruvate                                    | 4678     | 1891   | 695      | 570         | 440        | 8274      |
| Serum-C      | Serum total cholesterol                     | 4627     | 1889   | 696      | 562         | 441        | 8215      |
| Serum-TG     | Serum total triglycerides                   | 4627     | 1889   | 696      | 562         | 441        | 8215      |
| S-HDL-L      | Total lipids in small HDL                   | 4627     | 1889   | 696      | 562         | 441        | 8215      |
| S-HDL-P      | Concentration of small HDL particles        | 4627     | 1889   | 696      | 562         | 441        | 8215      |

| Abbreviation | Full metabolite name                                     | N (NFBC) | N (YF) | N (HBCS) | N (GenMets) | N (DILGOM) | N (Total) |
|--------------|----------------------------------------------------------|----------|--------|----------|-------------|------------|-----------|
| S-HDL-TG     | Triglycerides in small HDL                               | 4627     | 1889   | 696      | 562         | 441        | 8215      |
| S-LDL-C      | Total cholesterol in small LDL                           | 4627     | 1889   | 696      | 562         | 441        | 8215      |
| S-LDL-L      | Total lipids in small LDL                                | 4627     | 1889   | 696      | 562         | 441        | 8215      |
| S-LDL-P      | Concentration of small LDL particles                     | 4627     | 1889   | 696      | 562         | 441        | 8215      |
| SM           | Sphingomyelins                                           | 4466     | 1838   | 657      | 486         | 430        | 7877      |
| S-VLDL-C     | Total cholesterol in small VLDL                          | 4627     | 1889   | 696      | 562         | 441        | 8215      |
| S-VLDL-FC    | Free cholesterol in small VLDL                           | 4627     | 1889   | 696      | 562         | 441        | 8215      |
| S-VLDL-L     | Total lipids in small VLDL                               | 4627     | 1889   | 696      | 562         | 441        | 8215      |
| S-VLDL-P     | Concentration of small VLDL particles                    | 4627     | 1889   | 696      | 562         | 441        | 8215      |
| S-VLDL-PL    | Phospholipids in small VLDL                              | 4627     | 1889   | 696      | 562         | 441        | 8215      |
| S-VLDL-TG    | Triglycerides in small VLDL                              | 4627     | 1889   | 696      | 562         | 441        | 8215      |
| Tot-C        | Total cholesterol                                        | 4562     | 1879   | 683      | 549         | 433        | 8106      |
| Tot-CH       | Total cholines (and other N-trimethyl compounds)         | 4561     | 1876   | 683      | 549         | 433        | 8102      |
| Tot-FA       | Total fatty acids                                        | 4502     | 1873   | 682      | 548         | 432        | 8037      |
| Tot-PG       | Total phosphoglycerides                                  | 4562     | 1836   | 592      | 477         | 421        | 7888      |
| Tot-TG       | Total triglycerides                                      | 4559     | 1847   | 662      | 538         | 430        | 8036      |
| Tyr          | Tyrosine                                                 | 4666     | 1899   | 641      | 563         | 441        | 8210      |
| Urea         | Urea                                                     | 4694     | 1898   | 697      | 571         | 441        | 8301      |
| Val          | Valine                                                   | 4702     | 1903   | 705      | 572         | 441        | 8323      |
| VLDL-TG      | Triglycerides in VLDL                                    | 4627     | 1889   | 696      | 562         | 441        | 8215      |
| XL-HDL-C     | Total cholesterol in very large HDL                      | 4627     | 1889   | 696      | 562         | 441        | 8215      |
| XL-HDL-CE    | Cholesterol esters in very large HDL                     | 4627     | 1889   | 696      | 562         | 441        | 8215      |
| XL-HDL-FC    | Free cholesterol in very large HDL                       | 4627     | 1889   | 696      | 562         | 441        | 8215      |
| XL-HDL-L     | Total lipids in very large HDL                           | 4627     | 1889   | 696      | 562         | 441        | 8215      |
| XL-HDL-P     | Concentration of very large HDL particles                | 4627     | 1889   | 696      | 562         | 441        | 8215      |
| XL-HDL-PL    | Phospholipids in very large HDL                          | 4627     | 1889   | 696      | 562         | 441        | 8215      |
| XL-HDL-TG    | Triglycerides in very large HDL                          | 4627     | 1889   | 696      | 562         | 441        | 8215      |
| XL-VLDL-L    | Total lipids in very large VLDL                          | 4627     | 1889   | 696      | 562         | 441        | 8215      |
| XL-VLDL-P    | Concentration of very large VLDL particles               | 4627     | 1889   | 696      | 562         | 441        | 8215      |
| XL-VLDL-PL   | Phospholipids in very large VLDL                         | 4627     | 1889   | 696      | 562         | 441        | 8215      |
| XL-VLDL-TG   | Triglycerides in very large VLDL                         | 4627     | 1889   | 696      | 562         | 441        | 8215      |
| XS-VLDL-L    | Total lipids in very small VLDL                          | 4627     | 1889   | 696      | 562         | 441        | 8215      |
| XS-VLDL-P    | Concentration of very small VLDL particles               | 4627     | 1889   | 696      | 562         | 441        | 8215      |
| XS-VLDL-PL   | Phospholipids in very small VLDL                         | 4627     | 1889   | 696      | 562         | 441        | 8215      |
| XS-VLDL-TG   | Triglycerides in very small VLDL                         | 4627     | 1889   | 696      | 562         | 441        | 8215      |
| XXL-VLDL-L   | Total lipids in chylomicrons and largest VLDL particles  | 4627     | 1889   | 696      | 562         | 441        | 8215      |
| XXL-VLDL-P   | Concentration of chylomicrons and largest VLDL particles | 4627     | 1889   | 696      | 562         | 441        | 8215      |
| XXL-VLDL-PL  | Phospholipids in chylomicrons and largest VLDL particles | 4627     | 1889   | 696      | 562         | 441        | 8215      |
| XXL-VLDL-TG  | Triglycerides in chylomicrons and largest VLDL particles | 4627     | 1889   | 696      | 562         | 441        | 8215      |
| AcO/AcAcO    | Acetate to acetoacetate ratio                            | 4671     | 1887   | 697      | 566         | 438        | 8259      |

| Abbreviation | Full metabolite name                                                               | N (NFBC) | N (YF) | N (HBCS) | N (GenMets) | N (DILGOM) | N (Total) |
|--------------|------------------------------------------------------------------------------------|----------|--------|----------|-------------|------------|-----------|
| Ala/Cit      | Alanine to citrate ratio                                                           | 4568     | 1855   | 651      | 559         | 439        | 8072      |
| Ala/Glc      | Alanine to glucose ratio                                                           | 4688     | 1898   | 706      | 571         | 441        | 8304      |
| Ala/Gln      | Alanine to glutamine ratio                                                         | 4356     | 1854   | 259      | 560         | 441        | 7470      |
| Ala/His      | Alanine to histidine ratio                                                         | 4686     | 1894   | 705      | 570         | 442        | 8297      |
| Ala/Ile      | Alanine to isoleucine ratio                                                        | 4702     | 1902   | 706      | 571         | 441        | 8322      |
| Ala/Leu      | Alanine to leucine ratio                                                           | 4697     | 1900   | 708      | 572         | 440        | 8317      |
| Ala/Phe      | Alanine to phenylalanine ratio                                                     | 4684     | 1900   | 705      | 571         | 442        | 8302      |
| Ala/Pyr      | Alanine to pyruvate ratio                                                          | 4666     | 1887   | 694      | 567         | 439        | 8253      |
| Ala/Tyr      | Alanine to tyrosine ratio                                                          | 4650     | 1894   | 641      | 562         | 439        | 8186      |
| Ala/Val      | Alanine to valine ratio                                                            | 4690     | 1897   | 702      | 569         | 440        | 8298      |
| ApoA1        | Apolipoprotein A-I (Lipido)                                                        | 4338     | 1837   | 655      | 534         | 420        | 7784      |
| ApoB         | Apolipoprotein B (Lipido)                                                          | 4338     | 1837   | 655      | 534         | 420        | 7784      |
| ApoBtoApoA1  | Apolipoprotein B by apolipoprotein A-I (Lipido)                                    | 4338     | 1837   | 655      | 534         | 420        | 7784      |
| BCAAs        | Total branched chain amino acids; Val+Leu+Ile                                      | 4691     | 1901   | 704      | 572         | 441        | 8309      |
| Bis/DB       | Ratio of bisallylic groups to double bonds                                         | 4467     | 1849   | 681      | 546         | 433        | 7976      |
| Bis/FA       | Ratio of bisallylic groups to total fatty acids                                    | 4422     | 1850   | 682      | 545         | 432        | 7931      |
| bOHBuO/AcAcO | 3-hydroxybutyrate to acetoacetate ratio                                            | 4662     | 1885   | 694      | 0           | 435        | 7676      |
| bOHBuO/AcO   | 3-hydroxybutyrate to acetate ratio                                                 | 4651     | 1877   | 697      | 0           | 432        | 7657      |
| CH2/DB       | Average number of methylene groups per a double bond                               | 4544     | 1872   | 681      | 549         | 433        | 8079      |
| CH2/FA       | Average number of methylene groups in a fatty acid chain                           | 4500     | 1873   | 682      | 548         | 432        | 8035      |
| Crea/Alb     | Creatinine to albumin ratio                                                        | 4622     | 1886   | 692      | 561         | 440        | 8201      |
| DB/FA        | Average number of double bonds in a fatty acid chain                               | 4494     | 1867   | 680      | 548         | 432        | 8021      |
| DHA/FAw3     | Docosahexaenoic acid to omega-3 fatty acids ratio                                  | 4466     | 1843   | 614      | 537         | 429        | 7889      |
| DHA/PUFA     | Docosahexaenoic acid to other polyunsaturated fatty acids than linoleic acid ratio | 4451     | 1829   | 619      | 537         | 432        | 7868      |
| FALen        | Description of average fatty acid chain length, not actual carbon number           | 4415     | 1844   | 680      | 545         | 432        | 7916      |
| FAw3/FAw67   | Omega-3 fatty acids to omega-6 and -7 fatty acids ratio                            | 4473     | 1862   | 680      | 545         | 431        | 7991      |
| FAw3/FAw9S   | Omega-3 fatty acids to omega-9 and saturated fatty acids ratio                     | 4478     | 1866   | 681      | 547         | 431        | 8003      |
| FAw3/FA      | Ratio of omega-3 fatty acids to total fatty acids                                  | 4502     | 1873   | 682      | 548         | 432        | 8037      |
| FAw67/FAw9S  | Omega-6 and -7 fatty acids ratio to omega-9 and saturated fatty acids ratio        | 4500     | 1871   | 681      | 547         | 432        | 8031      |
| FAw67/FA     | Ratio of omega-6/7 fatty acids to total fatty acids                                | 4502     | 1873   | 682      | 548         | 432        | 8037      |
| FAw9S/FA     | Ratio of omega-9 and saturated fatty acids to total fatty acids                    | 4502     | 1873   | 682      | 548         | 432        | 8037      |
| FR           | Fischer's ratio; (Val+Leu+Ile)/(Phe+Tyr)                                           | 4658     | 1892   | 637      | 562         | 440        | 8189      |
| Free-C/Est-C | Free cholesterol to esterified cholesterol ratio                                   | 4493     | 1851   | 680      | 549         | 431        | 8004      |
| Glc/Cit      | Glucose to citrate ratio                                                           | 4558     | 1856   | 651      | 559         | 439        | 8063      |
| Glc/Pyr      | Glucose to pyruvate ratio                                                          | 4663     | 1888   | 693      | 567         | 437        | 8248      |
| Gln/Cit      | Glutamine to citrate ratio                                                         | 4291     | 1810   | 254      | 550         | 439        | 7344      |
| Gln/Glc      | Glutamine to glucose ratio                                                         | 4353     | 1853   | 261      | 562         | 438        | 7467      |

| Abbreviation | Full metabolite name                                                        | N (NFBC) | N (YF) | N (HBCS) | N (GenMets) | N (DILGOM) | N (Total) |
|--------------|-----------------------------------------------------------------------------|----------|--------|----------|-------------|------------|-----------|
| Gln/His      | Glutamine to histidine ratio                                                | 4365     | 1854   | 260      | 561         | 441        | 7481      |
| Gln/Ile      | Glutamine to isoleucine ratio                                               | 4369     | 1855   | 261      | 561         | 439        | 7485      |
| Gln/Leu      | Glutamine to leucine ratio                                                  | 4365     | 1856   | 261      | 561         | 438        | 7481      |
| Gln/Phe      | Glutamine to phenylalanine ratio                                            | 4366     | 1855   | 261      | 561         | 440        | 7483      |
| Gln/Pyr      | Glutamine to pyruvate ratio                                                 | 4340     | 1845   | 256      | 558         | 438        | 7437      |
| Gln/Tyr      | Glutamine to tyrosine ratio                                                 | 4345     | 1854   | 259      | 555         | 439        | 7452      |
| Gln/Val      | Glutamine to valine ratio                                                   | 4368     | 1854   | 261      | 561         | 439        | 7483      |
| Gp/Serum-TG  | Glycoprotein acetyls to serum total triglycerides ratio                     | 4609     | 1876   | 688      | 557         | 438        | 8168      |
| Gp/Tot-C     | Glycoprotein acetyls to serum total cholesterol ratio                       | 4552     | 1876   | 682      | 548         | 430        | 8088      |
| HDL2-C       | Total cholesterol in HDL2 (Lipido)                                          | 4620     | 1889   | 696      | 561         | 441        | 8207      |
| HDL3-C       | Total cholesterol in HDL3 (Lipido)                                          | 4620     | 1889   | 696      | 561         | 441        | 8207      |
| HDL-D        | Mean diameter for HDL particles                                             | 4627     | 1889   | 696      | 562         | 441        | 8215      |
| His/Ile      | Histidine to isoleucine ratio                                               | 4699     | 1893   | 705      | 569         | 440        | 8306      |
| His/Leu      | Histidine to leucine ratio                                                  | 4694     | 1896   | 706      | 572         | 441        | 8309      |
| His/Phe      | Histidine to phenylalanine ratio                                            | 4691     | 1896   | 705      | 571         | 442        | 8305      |
| His/Tyr      | Histidine to tyrosine ratio                                                 | 4644     | 1890   | 640      | 562         | 438        | 8174      |
| His/Val      | Histidine to valine ratio                                                   | 4688     | 1895   | 700      | 572         | 438        | 8293      |
| IDL-C-eFR    | Total cholesterol in IDL (Lipido)                                           | 4622     | 1889   | 696      | 562         | 441        | 8210      |
| Ile/Glc      | Isoleucine to glucose ratio                                                 | 4689     | 1899   | 702      | 570         | 437        | 8297      |
| Ile/Leu      | Isoleucine to leucine ratio                                                 | 4695     | 1901   | 708      | 572         | 439        | 8315      |
| Ile/Phe      | Isoleucine to phenylalanine ratio                                           | 4689     | 1900   | 705      | 570         | 439        | 8303      |
| Ile/Serum-C  | Isoleucine to serum total cholesterol ratio                                 | 4617     | 1886   | 694      | 560         | 437        | 8194      |
| Ile/Serum-TG | Isoleucine to serum total triglycerides ratio                               | 4605     | 1877   | 689      | 560         | 438        | 8169      |
| Ile/Tyr      | Isoleucine to tyrosine ratio                                                | 4657     | 1899   | 639      | 561         | 438        | 8194      |
| Ile/Val      | Isoleucine to valine ratio                                                  | 4676     | 1896   | 701      | 568         | 439        | 8280      |
| LA/DHA       | Linoleic acid to docosahexaenoic acid ratio                                 | 4521     | 1860   | 615      | 538         | 429        | 7963      |
| LA/FAw67     | Linoleic acid to omega-6 and -7 fatty acids ratio                           | 4499     | 1871   | 678      | 548         | 430        | 8026      |
| LA/PUFA      | Linoleic acid to other polyunsaturated fatty acids than linoleic acid ratio | 4468     | 1850   | 681      | 544         | 432        | 7975      |
| Lac/Ala      | Lactate to alanine ratio                                                    | 4674     | 1889   | 705      | 569         | 439        | 8276      |
| Lac/Cit      | Lactate to citrate ratio                                                    | 4552     | 1851   | 652      | 557         | 438        | 8050      |
| Lac/Glc      | Lactate to glucose ratio                                                    | 4672     | 1891   | 705      | 569         | 438        | 8275      |
| Lac/Gln      | Lactate to glutamine ratio                                                  | 4343     | 1843   | 260      | 556         | 437        | 7439      |
| Lac/Pyr      | Lactate to pyruvate ratio                                                   | 4644     | 1879   | 693      | 565         | 438        | 8219      |
| LDL-C-eFR    | Total cholesterol in LDL (Lipido)                                           | 4622     | 1889   | 696      | 562         | 441        | 8210      |
| LDL-D        | Mean diameter for LDL particles                                             | 4627     | 1889   | 696      | 562         | 441        | 8215      |
| Leu/Glc      | Leucine to glucose ratio                                                    | 4693     | 1900   | 708      | 571         | 440        | 8312      |
| Leu/Phe      | Leucine to phenylalanine ratio                                              | 4689     | 1897   | 707      | 571         | 441        | 8305      |
| Leu/Serum-TG | Leucine to serum total triglycerides ratio                                  | 4607     | 1879   | 689      | 559         | 438        | 8172      |
| Leu/Tyr      | Leucine to tyrosine ratio                                                   | 4653     | 1897   | 641      | 562         | 440        | 8193      |
| Leu/Val      | Leucine to valine ratio                                                     | 4692     | 1891   | 703      | 570         | 438        | 8294      |

| Abbreviation     | Full metabolite name                                                                             | N (NFBC) | N (YF) | N (HBCS) | N (GenMets) | N (DILGOM) | N (Total) |
|------------------|--------------------------------------------------------------------------------------------------|----------|--------|----------|-------------|------------|-----------|
| L-HDL-C/L-HDL-PL | Total cholesterol in large HDL to phospholipids in large HDL ratio                               | 4619     | 1887   | 695      | 562         | 439        | 8202      |
| L-HDL-L/M-HDL-L  | Total lipids in large HDL to total lipids in medium HDL ratio                                    | 4617     | 1887   | 694      | 561         | 439        | 8198      |
| L-HDL-L/S-HDL-L  | Total lipids in large HDL to total lipids in small HDL ratio                                     | 4620     | 1886   | 695      | 561         | 440        | 8202      |
| M-HDL-C/M-HDL-PL | Total cholesterol in medium HDL to phospholipids in medium HDL ratio                             | 4617     | 1887   | 695      | 562         | 439        | 8200      |
| M-HDL-L/S-HDL-L  | Total lipids in medium HDL to total lipids in small HDL ratio                                    | 4627     | 1889   | 696      | 561         | 441        | 8214      |
| M-LDL-C/M-LDL-PL | Total cholesterol in medium LDL to phospholipids in medium LDL ratio                             | 4623     | 1887   | 694      | 561         | 441        | 8206      |
| PC/Tot-CH        | Phosphatidylcholine and other cholines to total cholines (and other N-trimethyl compounds) ratio | 4524     | 1828   | 582      | 472         | 431        | 7837      |
| Phe/Tyr          | Phenylalanine to tyrosine ratio                                                                  | 4643     | 1887   | 640      | 563         | 440        | 8173      |
| Phe/Val          | Phenylalanine to valine ratio                                                                    | 4685     | 1893   | 701      | 571         | 440        | 8290      |
| Pyr/Cit          | Pyruvate to citrate ratio                                                                        | 4543     | 1840   | 641      | 556         | 434        | 8014      |
| Serum-TG/Glc     | Serum total triglycerides to glucose ratio                                                       | 4595     | 1885   | 694      | 561         | 436        | 8171      |
| TG/PG            | Ratio of triglycerides to phosphoglycerides                                                      | 4559     | 1808   | 577      | 469         | 421        | 7834      |
| Tot-C/Est-C      | Total cholesterol to esterified cholesterol ratio                                                | 4493     | 1851   | 680      | 549         | 431        | 8004      |
| Tyr/Val          | Tyrosine to valine ratio                                                                         | 4659     | 1895   | 637      | 562         | 438        | 8191      |
| Val/Glc          | Valine to glucose ratio                                                                          | 4693     | 1899   | 705      | 570         | 440        | 8307      |
| Val/Serum-TG     | Valine to serum total triglycerides ratio                                                        | 4609     | 1879   | 686      | 561         | 437        | 8172      |
| VLDL-D           | Mean diameter for VLDL particles                                                                 | 4627     | 1889   | 696      | 562         | 441        | 8215      |
| VLDL-TG-eFR      | Triglycerides in VLDL (Lipido)                                                                   | 4622     | 1889   | 696      | 562         | 441        | 8210      |
| XL-HDL-L/L-HDL-L | Total lipids in very large HDL to total lipids in large HDL ratio                                | 4625     | 1876   | 695      | 560         | 439        | 8195      |
| XL-HDL-L/M-HDL-L | Total lipids in very large HDL to total lipids in medium HDL ratio                               | 4607     | 1884   | 691      | 559         | 439        | 8180      |
| XL-HDL-L/S-HDL-L | Total lipids in very large HDL to total lipids in small HDL ratio                                | 4613     | 1884   | 692      | 560         | 438        | 8187      |



**Supplementary Table 2.** Rationale for the selection of ratios used in this study. Metabolite ratios are proxies for enzymatic activity when a pair of metabolites are closely connected to the direct substrates and products of an enzymatic conversion. The metabolites comprising the ratios are implicated in lipolysis, proteolysis, ketogenesis and glycolysis as well as reagents and products of enzymatic reactions. Table also lists the implied relations between ratios and disease end points when known.

| Metabolic pathway                                    | Ratios                                                                                                                                                                                                                                                     | Rational for the ratios                                                                                                                                                                                                                                                                                 |
|------------------------------------------------------|------------------------------------------------------------------------------------------------------------------------------------------------------------------------------------------------------------------------------------------------------------|---------------------------------------------------------------------------------------------------------------------------------------------------------------------------------------------------------------------------------------------------------------------------------------------------------|
| Amino acid metabolism                                | Ala/Gln, Ala/His, Ala/Ile, Ala/Leu, Ala/Phe, Ala/Tyr, Ala/Val, Gln/His, Gln/Ile, Gln/Leu, Gln/Phe, Gln/Tyr, Gln/Val, His/Ile, His/Leu, His/Phe, His/Tyr, His/Val, Ile/Leu, Ile/Phe, Ile/Tyr, Ile/Val, Leu/Phe, Leu/Tyr, Leu/Val, Phe/Tyr, Phe/Val, Tyr/Val | Enzymatic activity in interconversion of amino acids.                                                                                                                                                                                                                                                   |
| Gluconeogenesis                                      | Ala/Cit, Ala/Pyr, Ala/Glc, Glc/Cit, Gln/Cit, Glc/Pyr, Gln/Glc, Gln/Pyr, Lac/Ala, Lac/Cit, Lac/Glc, Lac/Gln, Lac/Pyr, Pyr/Cit                                                                                                                               | Enzymatic activity in reactions implicated in glycolysis and gluconeogenesis, lactic acidosis, and mitochondrial redox state.                                                                                                                                                                           |
| Ketogenesis                                          | AcO/AcAcO, bOHBuO/AcAcO, bOHBuO/AcO                                                                                                                                                                                                                        | Enzymatic activity in ketoacidosis, lactic acidosis, and mitochondrial redox state.                                                                                                                                                                                                                     |
| Kidney function                                      | Crea/Alb                                                                                                                                                                                                                                                   | Estimated glomerular filtration rate.                                                                                                                                                                                                                                                                   |
| Branched-chain amino acid link to lipid metabolism   | Ile/Serum-C, Ile/Serum-TG, Leu/Serum-TG, Val/Serum-TG                                                                                                                                                                                                      | Role of branched-chain amino acids in lipid metabolism <sup>8, 16</sup> .                                                                                                                                                                                                                               |
| Branched-chain amino acid link to glucose metabolism | Ile/Glc, Leu/Glc, Val/Glc, Serum-TG/Glc                                                                                                                                                                                                                    | Role of branched-chain amino acids in development of insulin resistance <sup>17</sup> , T2D <sup>18</sup> and obesity <sup>16</sup> .                                                                                                                                                                   |
| Glycoprotein link to lipid metabolism                | Gp/Serum-TG, Gp/Tot-C                                                                                                                                                                                                                                      | Connection between low-grade inflammation and lipid metabolism <sup>8</sup> .                                                                                                                                                                                                                           |
| Selected lipid ratios                                | Free-C/Est-C, Tot-C/Est-C, L-HDL-C/L-HDL-PL, M-HDL-C/M-HDL-PL, M-LDL-C/M-LDL-PL, PC/Tot-CH, TG/PG, ApoB/ApoA1                                                                                                                                              | Measures of cholesterol esterification <sup>19</sup> , cholesterol to phospholipid balance in HDL <sup>20, 21</sup> , phosphocholine and phosphoglycerine balance, and apolipoprotein balance, a measure for cardiovascular risk <sup>13</sup> .                                                        |
| HDL size ratios                                      | XL-HDL-L/L-HDL-L, XL-HDL-L/M-HDL-L, XL-HDL-L/S-HDL-L, L-HDL-L/M-HDL-L, L-HDL-L/S-HDL-L, M-HDL-L/S-HDL-L                                                                                                                                                    | Enzymatic activity regulating lipid concentration in different HDL particle sizes <sup>22, 23</sup> .                                                                                                                                                                                                   |
| Fatty acid saturation                                | Bis/DB, Bis/FA, CH2/DB, CH2/FA, DB/FA,                                                                                                                                                                                                                     | Cardiovascular protection <sup>24</sup> and risk for T2D <sup>25</sup>                                                                                                                                                                                                                                  |
| Polyunsaturated fatty acid                           | DHA/FAw3, DHA/PUFA, FAw3/FA, FAw3/FAw67, FAw3/FAw9S, FAw67/FA, FAw67/FAw9S, FAw9S/FA, LA/DHA, LA/FAw67                                                                                                                                                     | Fatty acid saturation ratios linked with energy production, modulation of inflammation, and maintenance of cell membrane integrity <sup>26</sup> and the risk for cardiovascular disease <sup>24</sup> , T2D <sup>25</sup> , renal failure <sup>27</sup> , and mild cognitive impairment <sup>9</sup> . |

**Supplementary Table 3.** Intraclass correlation coefficients for MZ and DZ twins, genetic and environmental raw variance estimates and heritability estimate for every phenotype.

| Abbreviation | Model | ICC-MZ | ICC-DZ | A variance (95%CI)  | D variance (95%CI)  | C variance (95%CI)  | E variance (95%CI)  | Heritability (95%CI) | Variance explained |
|--------------|-------|--------|--------|---------------------|---------------------|---------------------|---------------------|----------------------|--------------------|
| AcAcO        | AE    | 0.506  | 0.24   | 0.497 (0.392–0.606) | –                   | –                   | 0.502 (0.425–0.593) | 0.497 (0.405–0.578)  | NA                 |
| AcO          | CE    | 0.352  | 0.279  | –                   | –                   | 0.301 (0.220–0.389) | 0.697 (0.622–0.783) | –                    | NA                 |
| AcO/AcAcO    | AE    | 0.514  | 0.32   | 0.524 (0.424–0.628) | –                   | –                   | 0.471 (0.401–0.555) | 0.527 (0.442–0.601)  | NA                 |
| Ala          | ACE   | 0.498  | 0.359  | 0.307 (0.054–0.557) | –                   | 0.185 (0.000–0.379) | 0.503 (0.422–0.605) | 0.308 (0.054–0.553)  | 0.0056             |
| Ala/Cit      | ADE   | 0.543  | 0.186  | 0.196 (0.000–0.573) | 0.336 (0.000–0.630) | –                   | 0.464 (0.389–0.557) | 0.534 (0.440–0.612)  | 0.0022             |
| Ala/Glc      | AE    | 0.52   | 0.339  | 0.540 (0.441–0.643) | –                   | –                   | 0.455 (0.388–0.537) | 0.542 (0.459–0.614)  | 0.0075             |
| Ala/Gln      | ACE   | 0.67   | 0.42   | 0.525 (0.322–0.735) | –                   | 0.148 (0.000–0.322) | 0.327 (0.273–0.395) | 0.525 (0.324–0.717)  | 0.031              |
| Ala/His      | AE    | 0.457  | 0.283  | 0.459 (0.361–0.562) | –                   | –                   | 0.533 (0.457–0.623) | 0.463 (0.374–0.542)  | 0.018              |
| Ala/Ile      | AE    | 0.475  | 0.26   | 0.496 (0.390–0.606) | –                   | –                   | 0.506 (0.429–0.598) | 0.495 (0.402–0.576)  | NA                 |
| Ala/Leu      | ACE   | 0.455  | 0.294  | 0.275 (0.002–0.530) | –                   | 0.161 (0.000–0.375) | 0.561 (0.473–0.670) | 0.276 (0.002–0.519)  | NA                 |
| Ala/Phe      | AE    | 0.331  | 0.209  | 0.349 (0.243–0.458) | –                   | –                   | 0.650 (0.558–0.758) | 0.350 (0.248–0.442)  | 0.0076             |
| Ala/Pyr      | AE    | 0.451  | 0.233  | 0.459 (0.352–0.569) | –                   | –                   | 0.542 (0.462–0.639) | 0.458 (0.362–0.543)  | NA                 |
| Ala/Tyr      | AE    | 0.41   | 0.218  | 0.405 (0.300–0.514) | –                   | –                   | 0.592 (0.506–0.694) | 0.406 (0.308–0.495)  | 0.003              |
| Ala/Val      | ACE   | 0.445  | 0.297  | 0.214 (0.000–0.488) | –                   | 0.202 (0.000–0.412) | 0.581 (0.492–0.690) | 0.215 (0.000–0.483)  | 0.032              |
| Alb          | ACE   | 0.544  | 0.375  | 0.393 (0.150–0.634) | –                   | 0.165 (0.000–0.355) | 0.442 (0.368–0.536) | 0.393 (0.150–0.620)  | NA                 |
| ApoA1        | AE    | 0.616  | 0.271  | 0.605 (0.500–0.716) | –                   | –                   | 0.396 (0.330–0.476) | 0.605 (0.521–0.675)  | 0.058              |
| ApoB         | ADE   | 0.691  | 0.273  | 0.367 (0.000–0.759) | 0.338 (0.000–0.757) | –                   | 0.299 (0.247–0.368) | 0.702 (0.630–0.758)  | 0.042              |
| ApoB/ApoA1   | ADE   | 0.787  | 0.298  | 0.407 (0.000–0.812) | 0.364 (0.000–0.790) | –                   | 0.221 (0.183–0.271) | 0.777 (0.724–0.818)  | 0.077              |
| BCAAs        | AE    | 0.521  | 0.299  | 0.547 (0.443–0.655) | –                   | –                   | 0.455 (0.385–0.540) | 0.546 (0.459–0.621)  | 0.0036             |
| Bis/DB       | AE    | 0.523  | 0.221  | 0.488 (0.385–0.595) | –                   | –                   | 0.507 (0.431–0.598) | 0.491 (0.399–0.571)  | 0.104              |
| Bis/FA       | AE    | 0.507  | 0.26   | 0.489 (0.388–0.596) | –                   | –                   | 0.505 (0.430–0.594) | 0.492 (0.403–0.571)  | 0.088              |
| bOHBuO       | AE    | 0.51   | 0.252  | 0.535 (0.422–0.652) | –                   | –                   | 0.472 (0.395–0.566) | 0.532 (0.435–0.614)  | NA                 |
| bOHBuO/AcAcO | AE    | 0.439  | 0.304  | 0.472 (0.364–0.584) | –                   | –                   | 0.526 (0.445–0.623) | 0.473 (0.376–0.558)  | NA                 |
| bOHBuO/AcO   | AE    | 0.45   | 0.265  | 0.491 (0.378–0.609) | –                   | –                   | 0.514 (0.432–0.613) | 0.489 (0.389–0.576)  | NA                 |
| CH2/DB       | AE    | 0.556  | 0.341  | 0.558 (0.460–0.661) | –                   | –                   | 0.434 (0.368–0.513) | 0.563 (0.481–0.633)  | 0.048              |
| CH2/FA       | AE    | 0.374  | 0.217  | 0.392 (0.282–0.505) | –                   | –                   | 0.608 (0.517–0.715) | 0.392 (0.289–0.486)  | 0.022              |
| Cit          | AE    | 0.539  | 0.251  | 0.536 (0.432–0.644) | –                   | –                   | 0.463 (0.392–0.549) | 0.536 (0.448–0.612)  | 0.0005             |
| Crea         | ACE   | 0.584  | 0.372  | 0.412 (0.179–0.647) | –                   | 0.166 (0.000–0.355) | 0.418 (0.350–0.504) | 0.414 (0.180–0.636)  | NA                 |
| Crea/Alb     | ACE   | 0.578  | 0.357  | 0.414 (0.176–0.650) | –                   | 0.158 (0.143–0.650) | 0.425 (0.355–0.512) | 0.416 (0.177–0.635)  | NA                 |
| DB/FA        | AE    | 0.484  | 0.287  | 0.494 (0.391–0.602) | –                   | –                   | 0.503 (0.427–0.593) | 0.496 (0.405–0.575)  | 0.044              |
| DHA          | AE    | 0.475  | 0.285  | 0.477 (0.376–0.583) | –                   | –                   | 0.518 (0.442–0.609) | 0.480 (0.389–0.559)  | NA                 |
| DHA/FAw3     | AE    | 0.374  | 0.19   | 0.381 (0.270–0.496) | –                   | –                   | 0.619 (0.527–0.729) | 0.381 (0.276–0.476)  | NA                 |
| DHA/PUFA     | ACE   | 0.446  | 0.326  | 0.282 (0.006–0.546) | –                   | 0.172 (0.000–0.379) | 0.545 (0.455–0.658) | 0.282 (0.006–0.534)  | 0.0075             |
| Est-C        | AE    | 0.649  | 0.347  | 0.648 (0.551–0.751) | –                   | –                   | 0.348 (0.293–0.416) | 0.651 (0.579–0.710)  | 0.057              |
| FALen        | AE    | 0.311  | 0.175  | 0.330 (0.215–0.447) | –                   | –                   | 0.671 (0.572–0.789) | 0.330 (0.219–0.431)  | NA                 |
| FAw3         | AE    | 0.508  | 0.236  | 0.482 (0.379–0.589) | –                   | –                   | 0.514 (0.437–0.605) | 0.484 (0.393–0.564)  | 0.017              |
| FAw3/FA      | AE    | 0.476  | 0.285  | 0.493 (0.388–0.601) | –                   | –                   | 0.506 (0.429–0.598) | 0.493 (0.401–0.574)  | 0.028              |
| FAw3/FAw67   | AE    | 0.46   | 0.287  | 0.467 (0.365–0.573) | –                   | –                   | 0.528 (0.451–0.621) | 0.469 (0.378–0.550)  | 0.03               |
| FAw3/FAw9S   | AE    | 0.493  | 0.286  | 0.509 (0.404–0.618) | –                   | –                   | 0.490 (0.415–0.581) | 0.509 (0.418–0.589)  | 0.027              |
| FAw67        | AE    | 0.594  | 0.277  | 0.574 (0.473–0.680) | –                   | –                   | 0.423 (0.357–0.502) | 0.576 (0.493–0.646)  | 0.048              |
| FAw67/FA     | ACE   | 0.463  | 0.325  | 0.251 (0.000–0.521) | –                   | 0.201 (0.000–0.411) | 0.546 (0.457–0.655) | 0.252 (0.000–0.516)  | NA                 |
| FAw67/FAw9S  | CE    | 0.455  | 0.339  | –                   | –                   | 0.384 (0.300–0.475) | 0.614 (0.547–0.692) | –                    | NA                 |

| Abbreviation | Model | ICC-MZ | ICC-DZ | A variance (95%CI)  | D variance (95%CI)  | C variance (95%CI)  | E variance (95%CI)  | Heritability (95%CI) | Variance explained |
|--------------|-------|--------|--------|---------------------|---------------------|---------------------|---------------------|----------------------|--------------------|
| FAw9S        | AE    | 0.543  | 0.292  | 0.530 (0.430–0.635) | –                   | –                   | 0.464 (0.394–0.547) | 0.533 (0.448–0.607)  | 0.022              |
| FAw9S/FA     | ACE   | 0.476  | 0.326  | 0.280 (0.011–0.545) | –                   | 0.185 (0.000–0.393) | 0.532 (0.445–0.639) | 0.281 (0.011–0.537)  | NA                 |
| FR           | CE    | 0.416  | 0.319  | –                   | –                   | 0.359 (0.274–0.450) | 0.640 (0.570–0.722) | –                    | 0.0082             |
| Free-C       | AE    | 0.641  | 0.33   | 0.644 (0.545–0.749) | –                   | –                   | 0.356 (0.299–0.426) | 0.644 (0.570–0.706)  | 0.05               |
| Free-C/Est-C | AE    | 0.486  | 0.168  | 0.438 (0.334–0.546) | –                   | –                   | 0.556 (0.475–0.654) | 0.440 (0.345–0.526)  | 0.0044             |
| Glc          | ACE   | 0.492  | 0.373  | 0.253 (0.000–0.505) | –                   | 0.239 (0.036–0.436) | 0.507 (0.425–0.610) | 0.253 (0.000–0.501)  | 0.013              |
| Glc/Cit      | AE    | 0.564  | 0.353  | 0.580 (0.482–0.683) | –                   | –                   | 0.414 (0.351–0.490) | 0.584 (0.505–0.651)  | 0.0006             |
| Glc/Pyr      | AE    | 0.542  | 0.305  | 0.561 (0.459–0.668) | –                   | –                   | 0.440 (0.373–0.522) | 0.560 (0.476–0.633)  | 0.021              |
| Gln          | AE    | 0.527  | 0.297  | 0.547 (0.445–0.654) | –                   | –                   | 0.454 (0.384–0.537) | 0.547 (0.461–0.621)  | 0.014              |
| Gln/Cit      | AE    | 0.481  | 0.283  | 0.525 (0.418–0.637) | –                   | –                   | 0.477 (0.403–0.568) | 0.524 (0.432–0.604)  | NA                 |
| Gln/Glc      | ACE   | 0.497  | 0.343  | 0.279 (0.020–0.537) | –                   | 0.209 (0.000–0.412) | 0.511 (0.429–0.613) | 0.279 (0.020–0.533)  | 0.0026             |
| Gln/His      | ACE   | 0.504  | 0.372  | 0.339 (0.087–0.590) | –                   | 0.211 (0.007–0.407) | 0.459 (0.381–0.557) | 0.336 (0.086–0.578)  | 0.021              |
| Gln/Ile      | AE    | 0.587  | 0.314  | 0.593 (0.494–0.698) | –                   | –                   | 0.406 (0.343–0.481) | 0.594 (0.515–0.661)  | 0.037              |
| Gln/Leu      | AE    | 0.566  | 0.284  | 0.559 (0.459–0.663) | –                   | –                   | 0.438 (0.372–0.518) | 0.560 (0.478–0.631)  | 0.0014             |
| Gln/Phe      | AE    | 0.516  | 0.241  | 0.533 (0.425–0.644) | –                   | –                   | 0.474 (0.400–0.563) | 0.529 (0.438–0.608)  | 0.0013             |
| Gln/Pyr      | AE    | 0.499  | 0.31   | 0.548 (0.443–0.657) | –                   | –                   | 0.457 (0.387–0.543) | 0.545 (0.457–0.621)  | 0.016              |
| Gln/Tyr      | AE    | 0.552  | 0.324  | 0.555 (0.457–0.659) | –                   | –                   | 0.439 (0.373–0.519) | 0.559 (0.477–0.629)  | 0.0059             |
| Gln/Val      | ACE   | 0.546  | 0.376  | 0.339 (0.096–0.582) | –                   | 0.210 (0.009–0.404) | 0.452 (0.379–0.545) | 0.338 (0.096–0.576)  | 0.016              |
| Glol         | ACE   | 0.567  | 0.431  | 0.331 (0.103–0.559) | –                   | 0.255 (0.066–0.438) | 0.415 (0.346–0.502) | 0.331 (0.103–0.553)  | NA                 |
| Gp           | AE    | 0.541  | 0.298  | 0.527 (0.430–0.629) | –                   | –                   | 0.463 (0.395–0.544) | 0.532 (0.450–0.605)  | 0.0023             |
| Gp/Serum-TG  | AE    | 0.635  | 0.288  | 0.626 (0.526–0.731) | –                   | –                   | 0.375 (0.316–0.448) | 0.625 (0.549–0.689)  | 0.038              |
| Gp/Tot-C     | ACE   | 0.606  | 0.403  | 0.434 (0.208–0.666) | –                   | 0.185 (0.000–0.371) | 0.383 (0.318–0.466) | 0.433 (0.208–0.657)  | 0.053              |
| HDL2-C       | AE    | 0.757  | 0.287  | 0.721 (0.627–0.821) | –                   | –                   | 0.275 (0.231–0.330) | 0.724 (0.664–0.773)  | 0.059              |
| HDL3-C       | ADE   | 0.596  | 0.106  | 0.000 (0.000–0.314) | 0.565 (0.238–0.669) | –                   | 0.428 (0.360–0.513) | 0.569 (0.483–0.641)  | NA                 |
| HDL-C        | AE    | 0.742  | 0.291  | 0.712 (0.617–0.813) | –                   | –                   | 0.286 (0.240–0.343) | 0.713 (0.652–0.764)  | 0.059              |
| HDL-D        | AE    | 0.791  | 0.354  | 0.777 (0.686–0.875) | –                   | –                   | 0.222 (0.186–0.267) | 0.778 (0.728–0.817)  | 0.077              |
| His          | ACE   | 0.417  | 0.293  | 0.229 (0.000–0.497) | –                   | 0.178 (0.000–0.388) | 0.590 (0.496–0.704) | 0.230 (0.000–0.489)  | 0.0001             |
| His/Ile      | AE    | 0.534  | 0.27   | 0.541 (0.438–0.649) | –                   | –                   | 0.460 (0.390–0.545) | 0.540 (0.454–0.615)  | 0.057              |
| His/Leu      | ACE   | 0.567  | 0.383  | 0.292 (0.058–0.530) | –                   | 0.248 (0.049–0.440) | 0.454 (0.382–0.544) | 0.294 (0.058–0.528)  | NA                 |
| His/Phe      | AE    | 0.494  | 0.179  | 0.442 (0.342–0.547) | –                   | –                   | 0.551 (0.473–0.644) | 0.445 (0.354–0.527)  | 0.0084             |
| His/Tyr      | ACE   | 0.417  | 0.291  | 0.235 (0.000–0.508) | –                   | 0.180 (0.000–0.395) | 0.585 (0.491–0.702) | 0.235 (0.000–0.497)  | 0.006              |
| His/Val      | CE    | 0.443  | 0.318  | –                   | –                   | 0.380 (0.295–0.472) | 0.622 (0.554–0.701) | –                    | 0.0017             |
| IDL-C        | AE    | 0.635  | 0.341  | 0.657 (0.558–0.762) | –                   | –                   | 0.347 (0.292–0.415) | 0.654 (0.582–0.714)  | 0.075              |
| IDL-C-eFR    | ADE   | 0.702  | 0.262  | 0.307 (0.000–0.698) | 0.402 (0.018–0.772) | –                   | 0.293 (0.244–0.356) | 0.708 (0.642–0.760)  | 0.043              |
| IDL-FC       | AE    | 0.57   | 0.357  | 0.609 (0.509–0.715) | –                   | –                   | 0.392 (0.331–0.467) | 0.608 (0.531–0.674)  | 0.086              |
| IDL-L        | AE    | 0.629  | 0.344  | 0.657 (0.557–0.762) | –                   | –                   | 0.348 (0.293–0.417) | 0.653 (0.581–0.714)  | 0.095              |
| IDL-P        | AE    | 0.633  | 0.348  | 0.662 (0.562–0.767) | –                   | –                   | 0.344 (0.289–0.412) | 0.658 (0.586–0.718)  | 0.095              |
| IDL-PL       | AE    | 0.618  | 0.363  | 0.658 (0.558–0.762) | –                   | –                   | 0.348 (0.293–0.416) | 0.654 (0.582–0.714)  | 0.071              |
| IDL-TG       | AE    | 0.648  | 0.283  | 0.656 (0.554–0.764) | –                   | –                   | 0.354 (0.296–0.424) | 0.650 (0.575–0.712)  | 0.048              |
| Ile          | AE    | 0.496  | 0.26   | 0.509 (0.403–0.620) | –                   | –                   | 0.493 (0.417–0.584) | 0.508 (0.416–0.589)  | 0.033              |
| Ile/Glc      | AE    | 0.466  | 0.288  | 0.499 (0.394–0.608) | –                   | –                   | 0.502 (0.426–0.593) | 0.498 (0.406–0.579)  | 0.038              |
| Ile/Leu      | AE    | 0.503  | 0.251  | 0.498 (0.395–0.605) | –                   | –                   | 0.501 (0.426–0.590) | 0.499 (0.409–0.578)  | NA                 |
| Ile/Phe      | AE    | 0.469  | 0.232  | 0.488 (0.378–0.601) | –                   | –                   | 0.517 (0.438–0.613) | 0.485 (0.388–0.570)  | 0.036              |
| Ile/Serum-C  | AE    | 0.526  | 0.296  | 0.556 (0.451–0.666) | –                   | –                   | 0.448 (0.377–0.533) | 0.554 (0.466–0.629)  | 0.011              |
| Ile/Serum-TG | AE    | 0.523  | 0.259  | 0.532 (0.426–0.641) | –                   | –                   | 0.471 (0.398–0.559) | 0.530 (0.440–0.608)  | 0.042              |
| Ile/Tyr      | AE    | 0.522  | 0.203  | 0.488 (0.384–0.597) | –                   | –                   | 0.509 (0.433–0.601) | 0.489 (0.397–0.571)  | 0.025              |
| Ile/Val      | AE    | 0.46   | 0.205  | 0.425 (0.324–0.531) | –                   | –                   | 0.570 (0.488–0.666) | 0.428 (0.334–0.512)  | NA                 |

| Abbreviation     | Model | ICC-MZ | ICC-DZ | A variance (95%CI)  | D variance (95%CI)  | C variance (95%CI)  | E variance (95%CI)  | Heritability (95%CI) | Variance explained |
|------------------|-------|--------|--------|---------------------|---------------------|---------------------|---------------------|----------------------|--------------------|
| LA               | AE    | 0.645  | 0.267  | 0.619 (0.519–0.725) | –                   | –                   | 0.380 (0.319–0.453) | 0.620 (0.542–0.685)  | 0.053              |
| LA/DHA           | AE    | 0.494  | 0.326  | 0.519 (0.418–0.625) | –                   | –                   | 0.477 (0.405–0.564) | 0.521 (0.434–0.597)  | 0.027              |
| LA/FAw67         | ACE   | 0.46   | 0.371  | 0.257 (0.000–0.521) | –                   | 0.238 (0.030–0.442) | 0.509 (0.422–0.621) | 0.256 (0.000–0.513)  | 0.101              |
| LA/PUFA          | AE    | 0.614  | 0.364  | 0.616 (0.520–0.718) | –                   | –                   | 0.377 (0.319–0.447) | 0.621 (0.546–0.683)  | 0.251              |
| Lac              | ACE   | 0.468  | 0.325  | 0.255 (0.000–0.521) | –                   | 0.203 (0.000–0.411) | 0.540 (0.453–0.647) | 0.255 (0.000–0.517)  | NA                 |
| Lac/Ala          | AE    | 0.506  | 0.276  | 0.506 (0.404–0.612) | –                   | –                   | 0.489 (0.417–0.577) | 0.508 (0.420–0.585)  | NA                 |
| Lac/Cit          | AE    | 0.389  | 0.23   | 0.384 (0.282–0.490) | –                   | –                   | 0.612 (0.526–0.713) | 0.386 (0.289–0.473)  | 0.0029             |
| Lac/Glc          | AE    | 0.55   | 0.267  | 0.539 (0.438–0.644) | –                   | –                   | 0.458 (0.389–0.541) | 0.541 (0.455–0.614)  | NA                 |
| Lac/Gln          | ACE   | 0.436  | 0.333  | 0.217 (0.000–0.486) | –                   | 0.223 (0.011–0.427) | 0.560 (0.469–0.673) | 0.217 (0.000–0.482)  | 0.0029             |
| Lac/Pyr          | AE    | 0.522  | 0.248  | 0.524 (0.419–0.633) | –                   | –                   | 0.477 (0.404–0.565) | 0.523 (0.433–0.601)  | NA                 |
| LDL-C            | AE    | 0.629  | 0.362  | 0.674 (0.575–0.780) | –                   | –                   | 0.334 (0.281–0.401) | 0.668 (0.598–0.727)  | 0.077              |
| LDL-C-eFR        | AE    | 0.603  | 0.344  | 0.622 (0.523–0.726) | –                   | –                   | 0.378 (0.319–0.450) | 0.622 (0.546–0.686)  | 0.073              |
| LDL-D            | AE    | 0.424  | 0.206  | 0.414 (0.308–0.523) | –                   | –                   | 0.584 (0.499–0.685) | 0.415 (0.317–0.503)  | 0.011              |
| Leu              | AE    | 0.51   | 0.285  | 0.516 (0.414–0.623) | –                   | –                   | 0.482 (0.409–0.569) | 0.517 (0.429–0.594)  | NA                 |
| Leu/Glc          | AE    | 0.517  | 0.328  | 0.534 (0.434–0.638) | –                   | –                   | 0.462 (0.393–0.544) | 0.536 (0.452–0.609)  | NA                 |
| Leu/Phe          | AE    | 0.433  | 0.295  | 0.458 (0.356–0.564) | –                   | –                   | 0.538 (0.460–0.631) | 0.460 (0.368–0.541)  | NA                 |
| Leu/Serum-TG     | AE    | 0.568  | 0.267  | 0.561 (0.458–0.668) | –                   | –                   | 0.439 (0.372–0.521) | 0.561 (0.476–0.633)  | 0.022              |
| Leu/Tyr          | AE    | 0.412  | 0.191  | 0.389 (0.285–0.497) | –                   | –                   | 0.607 (0.520–0.709) | 0.391 (0.293–0.480)  | NA                 |
| Leu/Val          | AE    | 0.387  | 0.223  | 0.373 (0.272–0.476) | –                   | –                   | 0.622 (0.536–0.723) | 0.375 (0.280–0.461)  | 0.021              |
| L-HDL-C          | AE    | 0.778  | 0.302  | 0.754 (0.661–0.854) | –                   | –                   | 0.247 (0.207–0.297) | 0.753 (0.699–0.798)  | 0.084              |
| L-HDL-C/L-HDL-PL | AE    | 0.678  | 0.327  | 0.664 (0.568–0.765) | –                   | –                   | 0.332 (0.279–0.396) | 0.667 (0.599–0.724)  | 0.013              |
| L-HDL-CE         | AE    | 0.77   | 0.299  | 0.744 (0.651–0.845) | –                   | –                   | 0.256 (0.214–0.307) | 0.744 (0.688–0.790)  | 0.086              |
| L-HDL-FC         | AE    | 0.783  | 0.301  | 0.758 (0.665–0.858) | –                   | –                   | 0.242 (0.203–0.292) | 0.758 (0.704–0.801)  | 0.076              |
| L-HDL-L          | AE    | 0.778  | 0.31   | 0.754 (0.662–0.854) | –                   | –                   | 0.245 (0.205–0.295) | 0.755 (0.700–0.799)  | 0.083              |
| L-HDL-L/M-HDL-L  | AE    | 0.796  | 0.344  | 0.787 (0.696–0.887) | –                   | –                   | 0.216 (0.181–0.261) | 0.785 (0.736–0.824)  | 0.099              |
| L-HDL-L/S-HDL-L  | AE    | 0.793  | 0.349  | 0.780 (0.689–0.878) | –                   | –                   | 0.220 (0.184–0.265) | 0.780 (0.730–0.819)  | 0.087              |
| L-HDL-P          | AE    | 0.776  | 0.31   | 0.751 (0.659–0.851) | –                   | –                   | 0.248 (0.207–0.298) | 0.752 (0.697–0.796)  | 0.081              |
| L-HDL-PL         | AE    | 0.773  | 0.312  | 0.745 (0.652–0.844) | –                   | –                   | 0.252 (0.211–0.303) | 0.747 (0.692–0.792)  | 0.083              |
| L-LDL-C          | AE    | 0.63   | 0.366  | 0.674 (0.575–0.779) | –                   | –                   | 0.334 (0.280–0.400) | 0.669 (0.598–0.727)  | 0.079              |
| L-LDL-CE         | AE    | 0.637  | 0.343  | 0.672 (0.571–0.777) | –                   | –                   | 0.337 (0.283–0.405) | 0.666 (0.594–0.725)  | 0.076              |
| L-LDL-FC         | AE    | 0.598  | 0.365  | 0.652 (0.552–0.758) | –                   | –                   | 0.355 (0.299–0.426) | 0.647 (0.573–0.709)  | 0.08               |
| L-LDL-L          | AE    | 0.638  | 0.371  | 0.686 (0.587–0.791) | –                   | –                   | 0.323 (0.271–0.388) | 0.680 (0.611–0.736)  | 0.078              |
| L-LDL-P          | AE    | 0.644  | 0.369  | 0.690 (0.591–0.795) | –                   | –                   | 0.319 (0.268–0.383) | 0.684 (0.615–0.740)  | 0.077              |
| L-LDL-PL         | AE    | 0.638  | 0.363  | 0.685 (0.586–0.791) | –                   | –                   | 0.325 (0.272–0.390) | 0.678 (0.609–0.735)  | 0.079              |
| L-VLDL-C         | AE    | 0.579  | 0.253  | 0.550 (0.449–0.656) | –                   | –                   | 0.446 (0.378–0.529) | 0.552 (0.467–0.625)  | 0.035              |
| L-VLDL-CE        | AE    | 0.596  | 0.237  | 0.563 (0.461–0.671) | –                   | –                   | 0.435 (0.367–0.517) | 0.564 (0.480–0.637)  | 0.04               |
| L-VLDL-FC        | AE    | 0.572  | 0.265  | 0.544 (0.444–0.650) | –                   | –                   | 0.450 (0.382–0.533) | 0.547 (0.463–0.620)  | 0.036              |
| L-VLDL-L         | AE    | 0.584  | 0.247  | 0.557 (0.455–0.665) | –                   | –                   | 0.441 (0.372–0.523) | 0.558 (0.473–0.632)  | 0.027              |
| L-VLDL-P         | AE    | 0.582  | 0.262  | 0.559 (0.457–0.665) | –                   | –                   | 0.438 (0.370–0.519) | 0.561 (0.477–0.633)  | 0.024              |
| L-VLDL-PL        | AE    | 0.585  | 0.249  | 0.560 (0.457–0.667) | –                   | –                   | 0.438 (0.370–0.521) | 0.561 (0.476–0.634)  | 0.027              |
| L-VLDL-TG        | AE    | 0.585  | 0.255  | 0.562 (0.459–0.669) | –                   | –                   | 0.436 (0.369–0.518) | 0.563 (0.478–0.635)  | 0.011              |
| M-HDL-C          | ADE   | 0.668  | 0.23   | 0.277 (0.000–0.666) | 0.354 (0.000–0.705) | –                   | 0.355 (0.298–0.426) | 0.640 (0.566–0.701)  | 0.018              |
| M-HDL-C/M-HDL-PL | AE    | 0.615  | 0.269  | 0.610 (0.508–0.717) | –                   | –                   | 0.394 (0.331–0.470) | 0.608 (0.528–0.675)  | 0.018              |

| Abbreviation     | Model | ICC-MZ | ICC-DZ | A variance (95%CI)  | D variance (95%CI)  | C variance (95%CI)  | E variance (95%CI)  | Heritability (95%CI) | Variance explained |
|------------------|-------|--------|--------|---------------------|---------------------|---------------------|---------------------|----------------------|--------------------|
| M-HDL-CE         | ADE   | 0.661  | 0.222  | 0.258 (0.000–0.653) | 0.367 (0.000–0.702) | –                   | 0.362 (0.304–0.435) | 0.633 (0.557–0.695)  | 0.019              |
| M-HDL-FC         | AE    | 0.667  | 0.265  | 0.627 (0.529–0.730) | –                   | –                   | 0.366 (0.309–0.436) | 0.631 (0.557–0.694)  | 0.014              |
| M-HDL-L          | AE    | 0.646  | 0.25   | 0.604 (0.505–0.708) | –                   | –                   | 0.389 (0.329–0.463) | 0.608 (0.530–0.674)  | 0.01               |
| M-HDL-L/S-HDL-L  | AE    | 0.674  | 0.314  | 0.641 (0.546–0.741) | –                   | –                   | 0.349 (0.295–0.414) | 0.647 (0.578–0.706)  | 0.024              |
| M-HDL-P          | AE    | 0.632  | 0.253  | 0.592 (0.493–0.697) | –                   | –                   | 0.400 (0.338–0.475) | 0.597 (0.518–0.664)  | 0.0073             |
| M-HDL-PL         | AE    | 0.641  | 0.262  | 0.601 (0.503–0.704) | –                   | –                   | 0.391 (0.330–0.464) | 0.606 (0.529–0.672)  | 0.0081             |
| M-LDL-C          | AE    | 0.624  | 0.355  | 0.665 (0.565–0.771) | –                   | –                   | 0.343 (0.288–0.411) | 0.660 (0.587–0.719)  | 0.073              |
| M-LDL-C/M-LDL-PL | ACE   | 0.486  | 0.362  | 0.307 (0.047–0.562) | –                   | 0.202 (0.000–0.399) | 0.494 (0.411–0.598) | 0.306 (0.047–0.554)  | 0.053              |
| M-LDL-CE         | AE    | 0.624  | 0.358  | 0.665 (0.565–0.771) | –                   | –                   | 0.342 (0.287–0.410) | 0.660 (0.588–0.720)  | 0.073              |
| M-LDL-L          | AE    | 0.633  | 0.356  | 0.675 (0.575–0.781) | –                   | –                   | 0.334 (0.280–0.401) | 0.669 (0.598–0.728)  | 0.074              |
| M-LDL-P          | AE    | 0.637  | 0.354  | 0.681 (0.580–0.786) | –                   | –                   | 0.330 (0.276–0.396) | 0.674 (0.603–0.732)  | 0.073              |
| M-LDL-PL         | AE    | 0.658  | 0.313  | 0.675 (0.574–0.781) | –                   | –                   | 0.334 (0.280–0.402) | 0.669 (0.597–0.728)  | 0.067              |
| MobCH            | AE    | 0.581  | 0.218  | 0.547 (0.445–0.654) | –                   | –                   | 0.452 (0.383–0.535) | 0.548 (0.462–0.622)  | 0.043              |
| MobCH2           | AE    | 0.558  | 0.254  | 0.533 (0.432–0.639) | –                   | –                   | 0.463 (0.393–0.547) | 0.535 (0.450–0.610)  | 0.024              |
| MobCH3           | AE    | 0.593  | 0.231  | 0.555 (0.454–0.660) | –                   | –                   | 0.442 (0.375–0.522) | 0.557 (0.473–0.629)  | 0.054              |
| M-VLDL-C         | AE    | 0.644  | 0.252  | 0.598 (0.499–0.701) | –                   | –                   | 0.396 (0.335–0.470) | 0.601 (0.524–0.668)  | 0.053              |
| M-VLDL-CE        | AE    | 0.662  | 0.267  | 0.620 (0.522–0.723) | –                   | –                   | 0.374 (0.316–0.444) | 0.624 (0.549–0.687)  | 0.065              |
| M-VLDL-FC        | AE    | 0.629  | 0.241  | 0.582 (0.483–0.687) | –                   | –                   | 0.412 (0.349–0.488) | 0.586 (0.506–0.654)  | 0.038              |
| M-VLDL-L         | AE    | 0.628  | 0.238  | 0.586 (0.486–0.691) | –                   | –                   | 0.410 (0.347–0.487) | 0.588 (0.508–0.657)  | 0.035              |
| M-VLDL-P         | AE    | 0.624  | 0.241  | 0.585 (0.485–0.690) | –                   | –                   | 0.412 (0.348–0.489) | 0.587 (0.506–0.656)  | 0.034              |
| M-VLDL-PL        | AE    | 0.64   | 0.245  | 0.602 (0.502–0.707) | –                   | –                   | 0.395 (0.334–0.470) | 0.604 (0.525–0.671)  | 0.038              |
| M-VLDL-TG        | AE    | 0.615  | 0.246  | 0.578 (0.478–0.684) | –                   | –                   | 0.418 (0.354–0.496) | 0.580 (0.499–0.650)  | 0.031              |
| PC               | AE    | 0.59   | 0.266  | 0.579 (0.476–0.687) | –                   | –                   | 0.420 (0.354–0.501) | 0.580 (0.496–0.651)  | 0.032              |
| PC/Tot-CH        | CE    | 0.317  | 0.314  | –                   | –                   | 0.322 (0.237–0.415) | 0.680 (0.605–0.767) | –                    | NA                 |
| Phe              | AE    | 0.402  | 0.194  | 0.387 (0.283–0.495) | –                   | –                   | 0.610 (0.523–0.712) | 0.389 (0.291–0.477)  | 0.016              |
| Phe/Tyr          | AE    | 0.354  | 0.24   | 0.392 (0.282–0.504) | –                   | –                   | 0.609 (0.520–0.716) | 0.391 (0.289–0.483)  | 0.0093             |
| Phe/Val          | ACE   | 0.408  | 0.269  | 0.222 (0.000–0.493) | –                   | 0.174 (0.000–0.391) | 0.604 (0.509–0.721) | 0.222 (0.000–0.482)  | 0.027              |
| PUFA             | AE    | 0.621  | 0.307  | 0.617 (0.517–0.723) | –                   | –                   | 0.382 (0.322–0.456) | 0.618 (0.540–0.683)  | 0.076              |
| Pyr              | AE    | 0.49   | 0.33   | 0.522 (0.421–0.627) | –                   | –                   | 0.476 (0.405–0.560) | 0.523 (0.437–0.598)  | 0.018              |
| Pyr/Cit          | AE    | 0.491  | 0.161  | 0.451 (0.344–0.563) | –                   | –                   | 0.548 (0.465–0.647) | 0.452 (0.354–0.539)  | NA                 |
| Serum-C          | AE    | 0.657  | 0.321  | 0.659 (0.560–0.763) | –                   | –                   | 0.343 (0.289–0.411) | 0.657 (0.586–0.717)  | 0.051              |
| Serum-TG         | AE    | 0.639  | 0.255  | 0.611 (0.510–0.717) | –                   | –                   | 0.388 (0.327–0.463) | 0.611 (0.533–0.678)  | 0.039              |
| Serum-TG/Glc     | AE    | 0.564  | 0.272  | 0.556 (0.454–0.663) | –                   | –                   | 0.443 (0.375–0.526) | 0.557 (0.472–0.630)  | 0.034              |
| S-HDL-L          | AE    | 0.6    | 0.274  | 0.606 (0.502–0.715) | –                   | –                   | 0.398 (0.335–0.476) | 0.603 (0.522–0.672)  | 0.0024             |
| S-HDL-P          | ADE   | 0.591  | 0.218  | 0.259 (0.000–0.638) | 0.335 (0.000–0.679) | –                   | 0.405 (0.338–0.489) | 0.595 (0.508–0.665)  | 0.0028             |
| S-HDL-TG         | AE    | 0.665  | 0.336  | 0.661 (0.564–0.763) | –                   | –                   | 0.337 (0.284–0.402) | 0.662 (0.593–0.720)  | 0.067              |
| S-LDL-C          | AE    | 0.608  | 0.349  | 0.657 (0.555–0.764) | –                   | –                   | 0.353 (0.296–0.423) | 0.651 (0.576–0.712)  | 0.057              |
| S-LDL-L          | AE    | 0.616  | 0.341  | 0.659 (0.558–0.766) | –                   | –                   | 0.350 (0.294–0.421) | 0.653 (0.579–0.714)  | 0.05               |
| S-LDL-P          | AE    | 0.633  | 0.341  | 0.663 (0.563–0.769) | –                   | –                   | 0.344 (0.289–0.412) | 0.658 (0.586–0.718)  | 0.056              |
| SM               | AE    | 0.555  | 0.339  | 0.570 (0.471–0.673) | –                   | –                   | 0.425 (0.360–0.503) | 0.573 (0.492–0.642)  | 0.0044             |
| S-VLDL-C         | AE    | 0.723  | 0.282  | 0.696 (0.600–0.799) | –                   | –                   | 0.304 (0.255–0.364) | 0.696 (0.631–0.750)  | 0.022              |
| S-VLDL-FC        | ADE   | 0.71   | 0.255  | 0.359 (0.000–0.742) | 0.329 (0.000–0.737) | –                   | 0.305 (0.255–0.368) | 0.693 (0.627–0.747)  | 0.07               |
| S-VLDL-L         | ADE   | 0.706  | 0.236  | 0.275 (0.000–0.683) | 0.413 (0.011–0.760) | –                   | 0.307 (0.256–0.371) | 0.691 (0.625–0.745)  | 0.071              |
| S-VLDL-P         | ADE   | 0.691  | 0.233  | 0.276 (0.000–0.684) | 0.393 (0.000–0.743) | –                   | 0.324 (0.271–0.391) | 0.674 (0.604–0.730)  | 0.062              |
| S-VLDL-PL        | ADE   | 0.705  | 0.239  | 0.287 (0.000–0.695) | 0.404 (0.003–0.761) | –                   | 0.305 (0.255–0.369) | 0.694 (0.627–0.747)  | 0.081              |
| S-VLDL-TG        | AE    | 0.664  | 0.259  | 0.630 (0.532–0.734) | –                   | –                   | 0.367 (0.310–0.438) | 0.632 (0.557–0.694)  | 0.054              |
| TG/PG            | AE    | 0.521  | 0.24   | 0.507 (0.401–0.617) | –                   | –                   | 0.491 (0.415–0.582) | 0.508 (0.416–0.588)  | 0.002              |

| Abbreviation     | Model | ICC-MZ | ICC-DZ | A variance (95%CI)  | D variance (95%CI)  | C variance (95%CI)  | E variance (95%CI)  | Heritability (95%CI) | Variance explained |
|------------------|-------|--------|--------|---------------------|---------------------|---------------------|---------------------|----------------------|--------------------|
| Tot-C            | AE    | 0.658  | 0.352  | 0.659 (0.562–0.762) | –                   | –                   | 0.338 (0.284–0.404) | 0.661 (0.591–0.720)  | 0.052              |
| Tot-C/Est-C      | AE    | 0.483  | 0.165  | 0.435 (0.330–0.543) | –                   | –                   | 0.560 (0.478–0.658) | 0.437 (0.341–0.523)  | 0.0048             |
| Tot-CH           | AE    | 0.583  | 0.286  | 0.582 (0.480–0.690) | –                   | –                   | 0.417 (0.351–0.497) | 0.583 (0.500–0.653)  | 0.037              |
| Tot-FA           | AE    | 0.567  | 0.281  | 0.544 (0.444–0.649) | –                   | –                   | 0.449 (0.381–0.531) | 0.548 (0.464–0.620)  | 0.027              |
| Tot-PG           | AE    | 0.57   | 0.283  | 0.568 (0.465–0.676) | –                   | –                   | 0.430 (0.362–0.512) | 0.569 (0.484–0.642)  | NA                 |
| Tot-TG           | AE    | 0.535  | 0.247  | 0.516 (0.411–0.625) | –                   | –                   | 0.482 (0.408–0.571) | 0.517 (0.426–0.596)  | 0.017              |
| Tyr              | AE    | 0.362  | 0.247  | 0.388 (0.283–0.497) | –                   | –                   | 0.609 (0.521–0.713) | 0.389 (0.290–0.479)  | 0.0044             |
| Tyr/Val          | CE    | 0.368  | 0.283  | –                   | –                   | 0.310 (0.229–0.398) | 0.687 (0.613–0.773) | –                    | 0.024              |
| Urea             | AE    | 0.481  | 0.195  | 0.435 (0.333–0.541) | –                   | –                   | 0.558 (0.478–0.654) | 0.438 (0.345–0.522)  | NA                 |
| Val              | AE    | 0.429  | 0.277  | 0.445 (0.343–0.552) | –                   | –                   | 0.551 (0.472–0.646) | 0.447 (0.354–0.530)  | 0.024              |
| Val/Glc          | ACE   | 0.408  | 0.316  | 0.259 (0.000–0.528) | –                   | 0.171 (0.000–0.380) | 0.571 (0.476–0.691) | 0.258 (0.000–0.516)  | 0.0029             |
| Val/Serum-TG     | AE    | 0.553  | 0.226  | 0.528 (0.424–0.636) | –                   | –                   | 0.471 (0.399–0.558) | 0.528 (0.440–0.605)  | 0.027              |
| VLDL-D           | AE    | 0.543  | 0.268  | 0.529 (0.428–0.635) | –                   | –                   | 0.467 (0.397–0.551) | 0.531 (0.445–0.606)  | 0.0075             |
| VLDL-TG          | AE    | 0.627  | 0.247  | 0.594 (0.493–0.701) | –                   | –                   | 0.404 (0.341–0.481) | 0.595 (0.515–0.664)  | 0.035              |
| VLDL-TG-eFR      | AE    | 0.639  | 0.28   | 0.616 (0.516–0.721) | –                   | –                   | 0.382 (0.322–0.455) | 0.617 (0.541–0.682)  | 0.037              |
| XL-HDL-C         | AE    | 0.685  | 0.303  | 0.684 (0.585–0.789) | –                   | –                   | 0.322 (0.270–0.386) | 0.680 (0.611–0.737)  | 0.05               |
| XL-HDL-CE        | AE    | 0.697  | 0.294  | 0.698 (0.598–0.803) | –                   | –                   | 0.311 (0.260–0.374) | 0.692 (0.624–0.747)  | 0.049              |
| XL-HDL-FC        | AE    | 0.72   | 0.286  | 0.698 (0.601–0.801) | –                   | –                   | 0.303 (0.254–0.364) | 0.697 (0.632–0.751)  | 0.06               |
| XL-HDL-L         | AE    | 0.737  | 0.301  | 0.721 (0.625–0.823) | –                   | –                   | 0.282 (0.236–0.339) | 0.719 (0.657–0.769)  | 0.068              |
| XL-HDL-L/L-HDL-L | AE    | 0.572  | 0.201  | 0.532 (0.429–0.640) | –                   | –                   | 0.466 (0.394–0.552) | 0.533 (0.445–0.610)  | 0.001              |
| XL-HDL-L/M-HDL-L | AE    | 0.702  | 0.275  | 0.690 (0.591–0.794) | –                   | –                   | 0.316 (0.265–0.380) | 0.686 (0.617–0.742)  | 0.033              |
| XL-HDL-L/S-HDL-L | AE    | 0.742  | 0.291  | 0.733 (0.637–0.836) | –                   | –                   | 0.274 (0.229–0.331) | 0.728 (0.667–0.777)  | 0.06               |
| XL-HDL-P         | AE    | 0.746  | 0.291  | 0.727 (0.631–0.829) | –                   | –                   | 0.277 (0.231–0.333) | 0.724 (0.663–0.774)  | 0.074              |
| XL-HDL-PL        | ADE   | 0.752  | 0.286  | 0.442 (0.028–0.798) | 0.288 (0.000–0.707) | –                   | 0.262 (0.219–0.317) | 0.736 (0.678–0.782)  | 0.076              |
| XL-HDL-TG        | AE    | 0.626  | 0.366  | 0.643 (0.546–0.746) | –                   | –                   | 0.355 (0.300–0.423) | 0.644 (0.573–0.704)  | 0.091              |
| XL-VLDL-L        | AE    | 0.553  | 0.268  | 0.529 (0.429–0.635) | –                   | –                   | 0.465 (0.395–0.550) | 0.532 (0.446–0.607)  | 0.02               |
| XL-VLDL-P        | AE    | 0.557  | 0.263  | 0.529 (0.429–0.634) | –                   | –                   | 0.465 (0.395–0.549) | 0.532 (0.447–0.607)  | 0.018              |
| XL-VLDL-PL       | AE    | 0.551  | 0.268  | 0.519 (0.420–0.623) | –                   | –                   | 0.473 (0.403–0.557) | 0.523 (0.438–0.598)  | 0.02               |
| XL-VLDL-TG       | AE    | 0.548  | 0.267  | 0.524 (0.423–0.629) | –                   | –                   | 0.470 (0.400–0.555) | 0.527 (0.441–0.602)  | 0.019              |
| XS-VLDL-L        | AE    | 0.626  | 0.26   | 0.608 (0.507–0.714) | –                   | –                   | 0.393 (0.331–0.469) | 0.607 (0.528–0.674)  | 0.037              |
| XS-VLDL-P        | AE    | 0.627  | 0.257  | 0.612 (0.510–0.719) | –                   | –                   | 0.391 (0.329–0.467) | 0.610 (0.530–0.677)  | 0.054              |
| XS-VLDL-PL       | AE    | 0.617  | 0.306  | 0.624 (0.523–0.730) | –                   | –                   | 0.379 (0.319–0.452) | 0.622 (0.545–0.687)  | 0.082              |
| XS-VLDL-TG       | ADE   | 0.668  | 0.23   | 0.260 (0.000–0.667) | 0.408 (0.003–0.747) | –                   | 0.332 (0.277–0.402) | 0.668 (0.595–0.726)  | 0.051              |
| XXL-VLDL-L       | AE    | 0.526  | 0.288  | 0.510 (0.411–0.615) | –                   | –                   | 0.482 (0.411–0.568) | 0.514 (0.428–0.590)  | 0.018              |
| XXL-VLDL-P       | AE    | 0.454  | 0.311  | 0.493 (0.390–0.601) | –                   | –                   | 0.504 (0.429–0.595) | 0.495 (0.404–0.574)  | 0.0054             |
| XXL-VLDL-PL      | AE    | 0.541  | 0.264  | 0.505 (0.406–0.608) | –                   | –                   | 0.486 (0.415–0.571) | 0.509 (0.424–0.585)  | 0.02               |
| XXL-VLDL-TG      | AE    | 0.517  | 0.297  | 0.508 (0.408–0.612) | –                   | –                   | 0.485 (0.413–0.571) | 0.511 (0.425–0.587)  | 0.019              |

**Supplementary Table 4.** Sample demographics for the subsample of twin used for the heritability estimate comparison.

|                               | <b>MZ twins (n=106)</b> | <b>DZ twins(n=150)</b> |
|-------------------------------|-------------------------|------------------------|
| <b>Age (years old)</b>        | 28.7 ± 3.1              | 28.2 ± 1.8             |
| <b>Sex (# men)</b>            | 54                      | 86                     |
| <b>BMI (kg/m<sup>2</sup>)</b> | 26.2 ± 4.8              | 24.4 ± 4.2             |

Note: The sample consist of 106 MZ and 150 DZ twins, 65 of which were evaluated in our previous round of heritability analyses.

**Supplementary Table 5.** Comparison of heritability estimates of NMR measured lipids and enzymatically measured lipids in 256 twins.

| <b>Trait</b> | <b>Enzymatic lipid measures</b> |            |                          |                          |                          | <b>NMR lipid measures</b> |            |                          |                          |                          |
|--------------|---------------------------------|------------|--------------------------|--------------------------|--------------------------|---------------------------|------------|--------------------------|--------------------------|--------------------------|
|              | ICC-<br>MZ                      | ICC-<br>DZ | A variance<br>(95%CI)    | E variance<br>(95%CI)    | Heritability<br>(95%CI)  | ICC-<br>MZ                | ICC-<br>DZ | A variance<br>(95%CI)    | E variance<br>(95%CI)    | Heritability<br>(95%CI)  |
| HDL-C        | 0.678                           | 0.306      | 0.665<br>(0.473 – 0.895) | 0.318<br>(0.227 – 0.455) | 0.677<br>(0.530 – 0.779) | 0.643                     | 0.282      | 0.602<br>(0.393 – 0.846) | 0.386<br>(0.272 – 0.560) | 0.609<br>(0.431 – 0.737) |
| LDL-C        | 0.634                           | 0.435      | 0.731<br>(0.525 – 0.976) | 0.282<br>(0.197 – 0.416) | 0.722<br>(0.578 – 0.815) | 0.591                     | 0.441      | 0.734<br>(0.518 – 0.987) | 0.286<br>(0.196 – 0.432) | 0.720<br>(0.565 – 0.818) |
| TC           | 0.702                           | 0.372      | 0.723<br>(0.521 – 0.964) | 0.283<br>(0.199 – 0.414) | 0.719<br>(0.577 – 0.813) | 0.724                     | 0.380      | 0.830<br>(0.614 – 1.000) | 0.213<br>(0.144 – 0.330) | 0.796<br>(0.669 – 0.870) |
| TG           | 0.526                           | 0.343      | 0.550<br>(0.340 – 0.790) | 0.445<br>(0.319 – 0.633) | 0.553<br>(0.366 – 0.691) | 0.650                     | 0.318      | 0.693<br>(0.466 – 0.954) | 0.324<br>(0.221 – 0.490) | 0.681<br>(0.506 – 0.795) |

A refers to additive genetic influences; E refers to specific environmental influences; 95%CI stands for 95% confidence intervals of the given estimate; heritability refers to broad sense heritability estimate.

**Supplementary Table 6.** Genome wide inflation factors from the meta-analysis for each trait.

| <b>Abbreviation</b> | <b>Lambda</b> | <b>Abbreviation</b> | <b>Lambda</b> |
|---------------------|---------------|---------------------|---------------|
| AcAcO               | 1.03          | L-LDL-P             | 1.02          |
| AcO                 | 1.02          | L-LDL-PL            | 1.02          |
| Ala                 | 1.03          | L-VLDL-C            | 1.04          |
| Alb                 | 1.02          | L-VLDL-CE           | 1.04          |
| bOHBuO              | 1.05          | L-VLDL-FC           | 1.03          |
| Cit                 | 1.03          | L-VLDL-L            | 1.03          |
| Crea                | 1.02          | L-VLDL-P            | 1.03          |
| DHA                 | 1.03          | L-VLDL-PL           | 1.03          |
| Est-C               | 1.01          | L-VLDL-TG           | 1.03          |
| FAw3                | 1.03          | M-HDL-C             | 1.01          |
| FAw67               | 1.01          | M-HDL-CE            | 1.01          |
| FAw9S               | 1.02          | M-HDL-FC            | 1.02          |
| Free-C              | 1.02          | M-HDL-L             | 1.01          |
| Glc                 | 1.05          | M-HDL-P             | 1.02          |
| Gln                 | 1.02          | M-HDL-PL            | 1.02          |
| Glol                | 1.03          | M-LDL-C             | 1.02          |
| Gp                  | 1.04          | M-LDL-CE            | 1.02          |
| HDL-C               | 1.03          | M-LDL-L             | 1.02          |
| His                 | 1.02          | M-LDL-P             | 1.02          |
| IDL-C               | 1.03          | M-LDL-PL            | 1.02          |
| IDL-FC              | 1.03          | MobCH               | 1.03          |
| IDL-L               | 1.02          | MobCH2              | 1.03          |
| IDL-P               | 1.02          | MobCH3              | 1.02          |
| IDL-PL              | 1.02          | M-VLDL-C            | 1.02          |
| IDL-TG              | 1.03          | M-VLDL-CE           | 1.02          |
| Ile                 | 1.04          | M-VLDL-FC           | 1.02          |
| LA                  | 1.01          | M-VLDL-L            | 1.02          |
| Lac                 | 1.04          | M-VLDL-P            | 1.02          |
| LDL-C               | 1.02          | M-VLDL-PL           | 1.02          |
| Leu                 | 1.02          | M-VLDL-TG           | 1.03          |
| L-HDL-C             | 1.04          | PC                  | 1             |
| L-HDL-CE            | 1.04          | Phe                 | 1.03          |
| L-HDL-FC            | 1.04          | PUFA                | 1.03          |
| L-HDL-L             | 1.04          | Pyr                 | 1.01          |
| L-HDL-P             | 1.04          | Serum-C             | 1.02          |
| L-HDL-PL            | 1.04          | Serum-TG            | 1.03          |
| L-LDL-C             | 1.02          | S-HDL-L             | 1.01          |
| L-LDL-CE            | 1.02          | S-HDL-P             | 1.01          |
| L-LDL-FC            | 1.02          | S-HDL-TG            | 1.02          |



| <b>Abbreviation</b> | <b>Lambda</b> | <b>Abbreviation</b> | <b>Lambda</b> |
|---------------------|---------------|---------------------|---------------|
| <b>L-LDL-L</b>      | 1.02          | <b>S-LDL-C</b>      | 1.02          |
| <b>S-LDL-L</b>      | 1.02          | <b>Ala/Ile</b>      | 1.03          |
| <b>S-LDL-P</b>      | 1.02          | <b>Ala/Leu</b>      | 1.03          |
| <b>SM</b>           | 1.02          | <b>Ala/Phe</b>      | 1.04          |
| <b>S-VLDL-C</b>     | 1.02          | <b>Ala/Pyr</b>      | 1.01          |
| <b>S-VLDL-FC</b>    | 1.03          | <b>Ala/Tyr</b>      | 1.03          |
| <b>S-VLDL-L</b>     | 1.03          | <b>Ala/Val</b>      | 1.03          |
| <b>S-VLDL-P</b>     | 1.03          | <b>ApoA1</b>        | 1.01          |
| <b>S-VLDL-PL</b>    | 1.03          | <b>ApoB</b>         | 1.02          |
| <b>S-VLDL-TG</b>    | 1.03          | <b>ApoB/ApoA1</b>   | 1.04          |
| <b>Tot-C</b>        | 1.02          | <b>BCAAs</b>        | 1.03          |
| <b>Tot-CH</b>       | 1             | <b>Bis/DB</b>       | 1.03          |
| <b>Tot-FA</b>       | 1.01          | <b>Bis/FA</b>       | 1.03          |
| <b>Tot-PG</b>       | 1.01          | <b>bOHBuO/AcAcO</b> | 1.01          |
| <b>Tot-TG</b>       | 1.03          | <b>bOHBuO/AcO</b>   | 1.01          |
| <b>Tyr</b>          | 1.03          | <b>CH2/DB</b>       | 1.03          |
| <b>Urea</b>         | 1             | <b>CH2/FA</b>       | 1.02          |
| <b>Val</b>          | 1.03          | <b>Crea/Alb</b>     | 1.03          |
| <b>VLDL-TG</b>      | 1.03          | <b>DB/FA</b>        | 1.03          |
| <b>XL-HDL-C</b>     | 1.01          | <b>DHA/FAw3</b>     | 1.01          |
| <b>XL-HDL-CE</b>    | 1.01          | <b>DHA/PUFA</b>     | 1.02          |
| <b>XL-HDL-FC</b>    | 1.02          | <b>FALen</b>        | 1.01          |
| <b>XL-HDL-L</b>     | 1.02          | <b>FAw3/FAw67</b>   | 1.03          |
| <b>XL-HDL-P</b>     | 1.03          | <b>FAw3/FAw9S</b>   | 1.03          |
| <b>XL-HDL-PL</b>    | 1.03          | <b>FAw3/FA</b>      | 1.03          |
| <b>XL-HDL-TG</b>    | 1.02          | <b>FAw67/FAw9S</b>  | 1.03          |
| <b>XL-VLDL-L</b>    | 1.03          | <b>FAw67/FA</b>     | 1.03          |
| <b>XL-VLDL-P</b>    | 1.03          | <b>FAw9S/FA</b>     | 1.03          |
| <b>XL-VLDL-PL</b>   | 1.03          | <b>FR</b>           | 1.03          |
| <b>XL-VLDL-TG</b>   | 1.03          | <b>Free-C/Est-C</b> | 1             |
| <b>XS-VLDL-L</b>    | 1.03          | <b>Glc/Cit</b>      | 1.05          |
| <b>XS-VLDL-P</b>    | 1.03          | <b>Glc/Pyr</b>      | 0.99          |
| <b>XS-VLDL-PL</b>   | 1.03          | <b>Gln/Cit</b>      | 1.04          |
| <b>XS-VLDL-TG</b>   | 1.03          | <b>Gln/Glc</b>      | 1.03          |
| <b>XXL-VLDL-L</b>   | 1.03          | <b>Gln/His</b>      | 1.01          |
| <b>XXL-VLDL-P</b>   | 1.05          | <b>Gln/Ile</b>      | 1.03          |
| <b>XXL-VLDL-PL</b>  | 1.04          | <b>Gln/Leu</b>      | 1.01          |
| <b>XXL-VLDL-TG</b>  | 1.03          | <b>Gln/Phe</b>      | 1.03          |
| <b>AcO/AcAcO</b>    | 1.01          | <b>Gln/Pyr</b>      | 1.02          |

| <b>Abbreviation</b> | <b>Lambda</b> | <b>Abbreviation</b>     | <b>Lambda</b> |
|---------------------|---------------|-------------------------|---------------|
| <b>Ala/Cit</b>      | 1.06          | <b>Lac/Gln</b>          | 1.04          |
| <b>Ala/Glc</b>      | 1.03          | <b>Lac/Pyr</b>          | 1.02          |
| <b>Ala/Gln</b>      | 1.02          | <b>LDL-C-eFR</b>        | 1.03          |
| <b>Ala/His</b>      | 1.01          | <b>LDL-D</b>            | 1.01          |
| <b>Gln/Tyr</b>      | 1.03          | <b>Leu/Glc</b>          | 1.03          |
| <b>Gln/Val</b>      | 1.02          | <b>Leu/Phe</b>          | 1.03          |
| <b>Gp/Serum-TG</b>  | 1.04          | <b>Leu/Serum-TG</b>     | 1.03          |
| <b>Gp/Tot-C</b>     | 1.03          | <b>Leu/Tyr</b>          | 1.01          |
| <b>HDL2-C</b>       | 1.04          | <b>Leu/Val</b>          | 1.01          |
| <b>HDL3-C</b>       | 1             | <b>L-HDL-C/L-HDL-PL</b> | 1.02          |
| <b>HDL-D</b>        | 1.03          | <b>L-HDL-L/M-HDL-L</b>  | 1.04          |
| <b>His/Ile</b>      | 1.04          | <b>L-HDL-L/S-HDL-L</b>  | 1.04          |
| <b>His/Leu</b>      | 1.02          | <b>M-HDL-C/M-HDL-PL</b> | 1.03          |
| <b>His/Phe</b>      | 1.03          | <b>M-HDL-L/S-HDL-L</b>  | 1.02          |
| <b>His/Tyr</b>      | 1.02          | <b>M-LDL-C/M-LDL-PL</b> | 1.02          |
| <b>His/Val</b>      | 1.03          | <b>PC/Tot-CH</b>        | 1             |
| <b>IDL-C-eFR</b>    | 1.02          | <b>Phe/Tyr</b>          | 1.02          |
| <b>Ile/Glc</b>      | 1.03          | <b>Phe/Val</b>          | 1.02          |
| <b>Ile/Leu</b>      | 1.02          | <b>Pyr/Cit</b>          | 1.03          |
| <b>Ile/Phe</b>      | 1.02          | <b>Serum-TG/Glc</b>     | 1.03          |
| <b>Ile/Serum-C</b>  | 1.03          | <b>TG/PG</b>            | 1.02          |
| <b>Ile/Serum-TG</b> | 1.03          | <b>Tot-C/Est-C</b>      | 1             |
| <b>Ile/Tyr</b>      | 1.03          | <b>Tyr/Val</b>          | 1.02          |
| <b>Ile/Val</b>      | 1.02          | <b>Val/Glc</b>          | 1.03          |
| <b>LA/DHA</b>       | 1.03          | <b>Val/Serum-TG</b>     | 1.04          |
| <b>LA/FAw67</b>     | 1.03          | <b>VLDL-D</b>           | 1.02          |
| <b>LA/PUFA</b>      | 1.03          | <b>VLDL-TG-eFR</b>      | 1.04          |
| <b>Lac/Ala</b>      | 1.04          | <b>XL-HDL-L/L-HDL-L</b> | 1.01          |
| <b>Lac/Cit</b>      | 1.02          | <b>XL-HDL-L/M-HDL-L</b> | 1.01          |
| <b>Lac/Glc</b>      | 1.02          | <b>XL-HDL-L/S-HDL-L</b> | 1.01          |

**Supplementary Table 7.** All metabolite associations  $P < 2.31 \times 10^{-10}$ . **N.B!** This table is provided as a separate file.

**Supplementary Table 8.** Spearman rank correlation *P*-values for expression eQTLs reaching genome wide significance ( $P < 9 \times 10^{-7}$ ).

| <b>Gene</b>   | <b>snp</b>  | <b><i>P</i>-value</b> | <b>Chromosome</b> | <b>Position</b> |
|---------------|-------------|-----------------------|-------------------|-----------------|
| <b>FCGR2B</b> | 1-159807481 | $1.3 \times 10^{-20}$ | 1                 | 159914011       |
| <b>FCGR2B</b> | 1-159807481 | $1.6 \times 10^{-12}$ | 1                 | 159914480       |
| <b>CLTCL1</b> | rs807669    | $1.8 \times 10^{-19}$ | 22                | 17555106        |
| <b>PLTP</b>   | rs6065904   | $2.4 \times 10^{-8}$  | 20                | 43961028        |
| <b>SPRYD4</b> | rs2638315   | $3.8 \times 10^{-13}$ | 12                | 55149894        |
| <b>FCGR2A</b> | 1-159807481 | $3.9 \times 10^{-10}$ | 1                 | 159755560       |

## Supplementary Figures

**Supplementary Figure 1.** Regional plots for significant loci. The green colored dot is used if the SNP has been genotyped in at least 3 study cohorts. Blue dot marks SNPs imputed from HapMap 3 reference panel and black dot represent SNPs genotyped from 1000 genomes reference panel. Red line presents the significance level  $P = 2.32 \cdot 10^{-10}$  and black line represents the nominal genome wide level of significance ( $P < 5 \cdot 10^{-8}$ ). Genes in the region are represented with bars in different colors and the regional candidate gene is shown in thicker black bar.

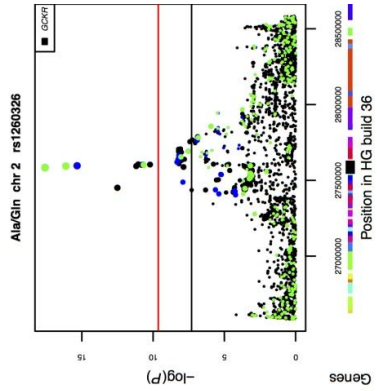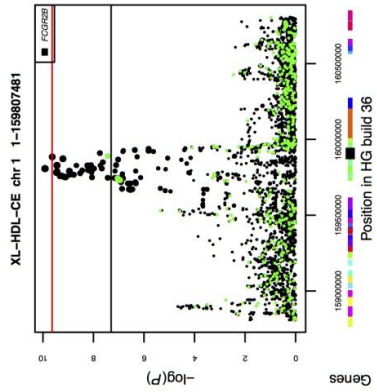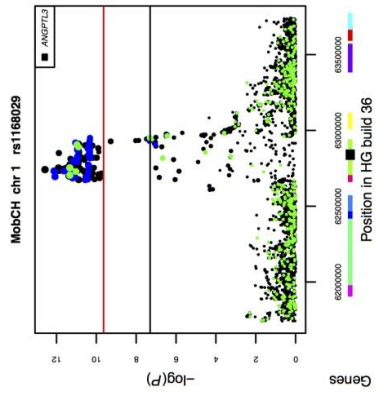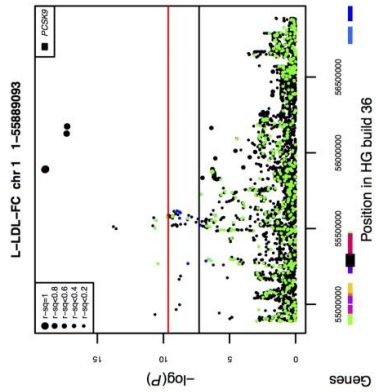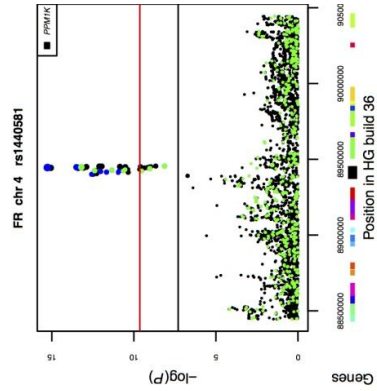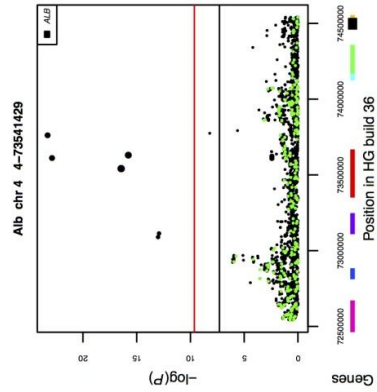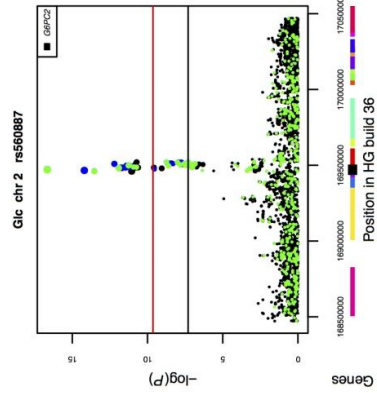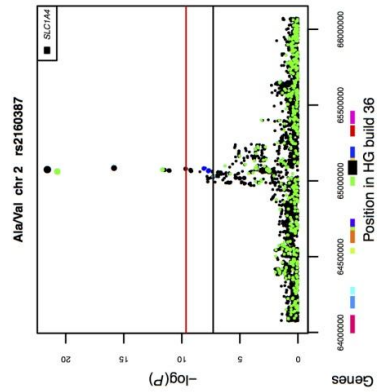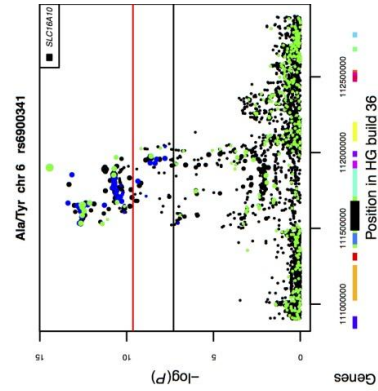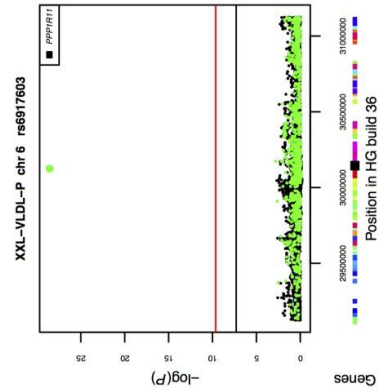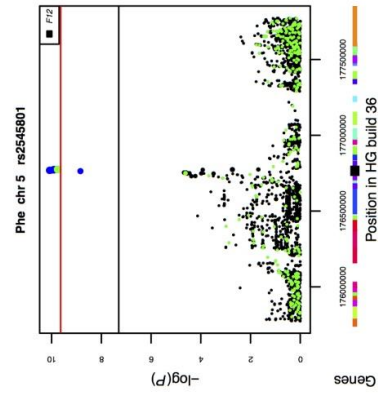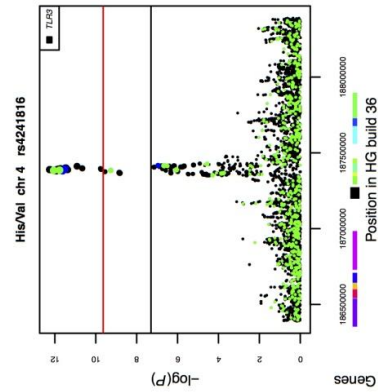

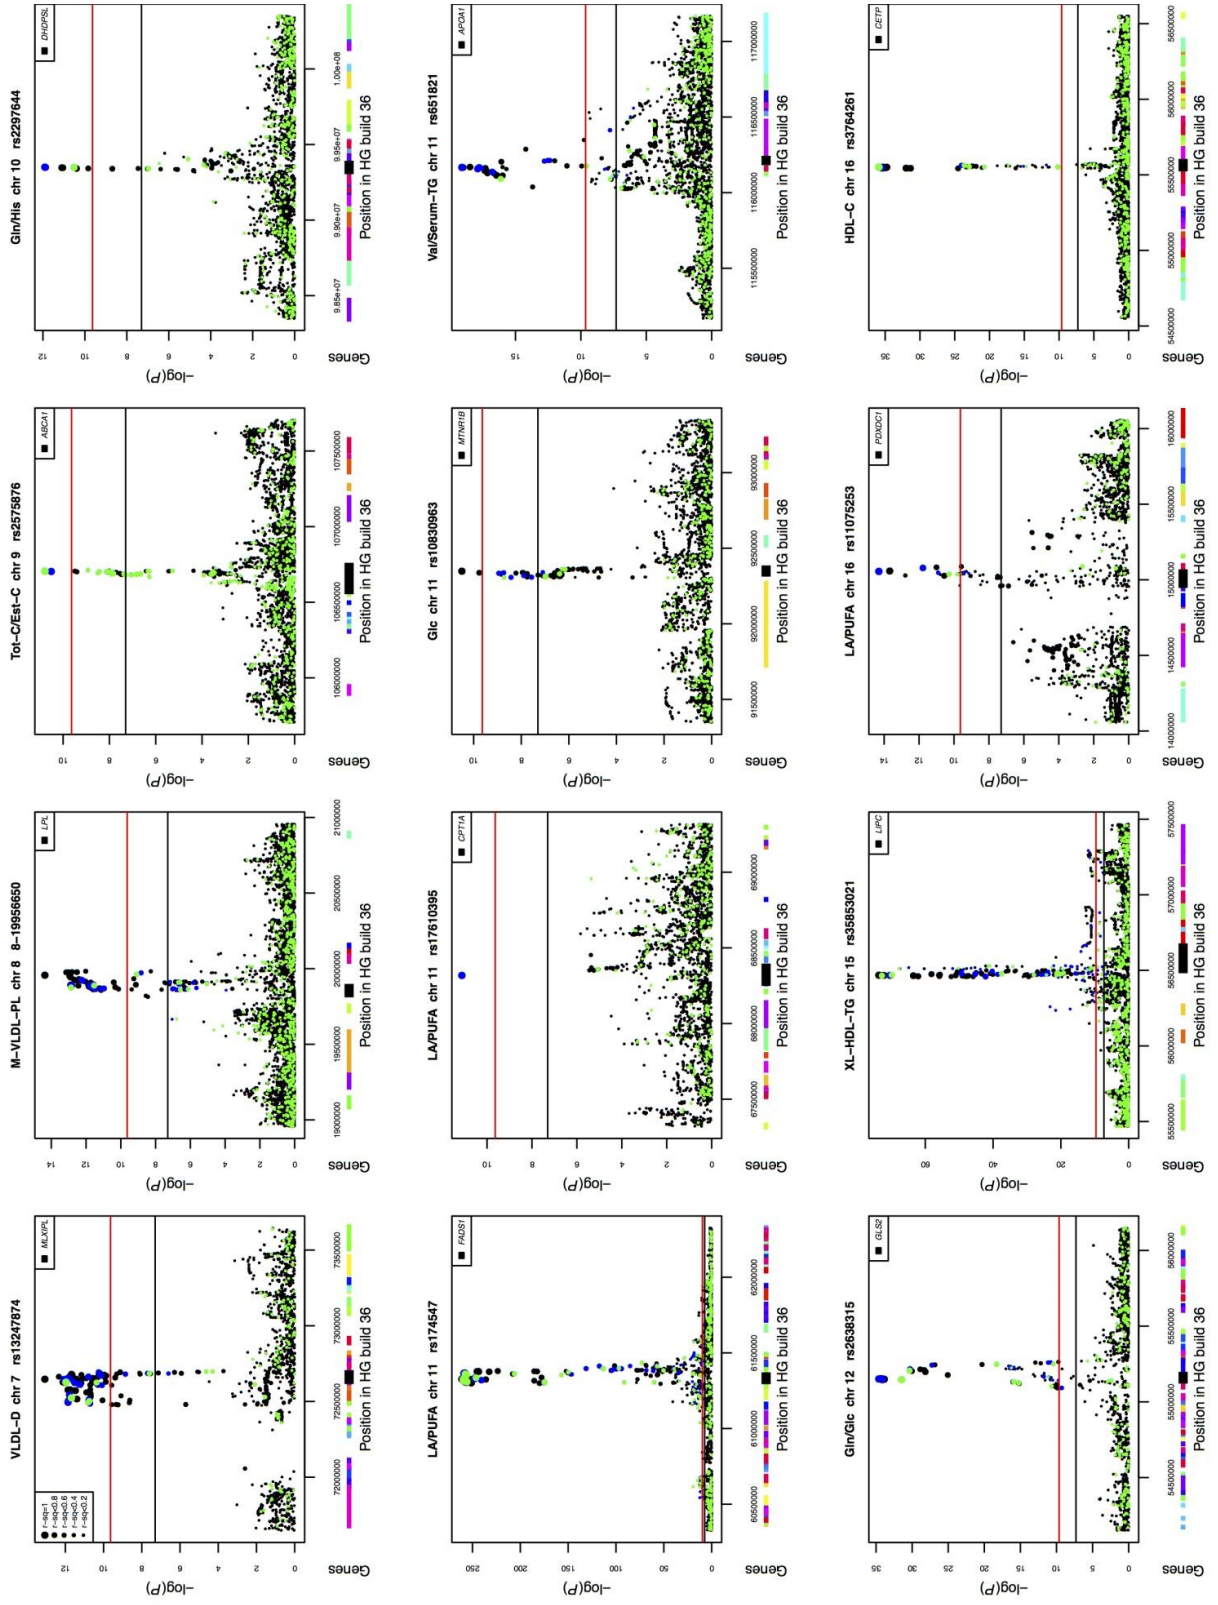



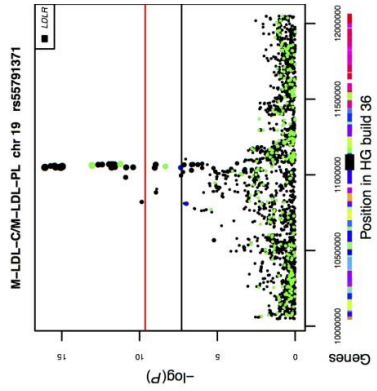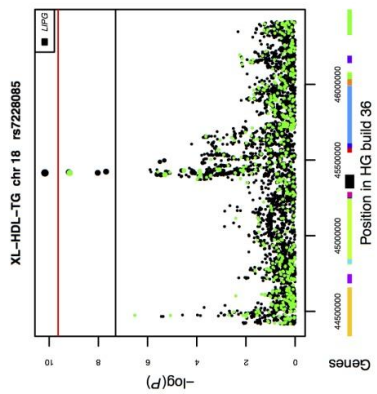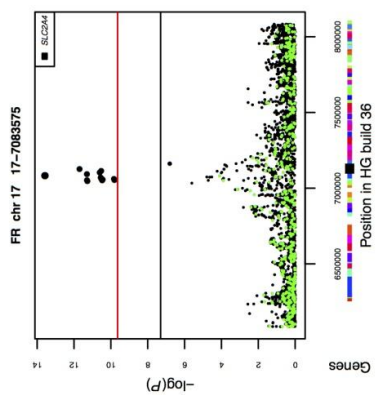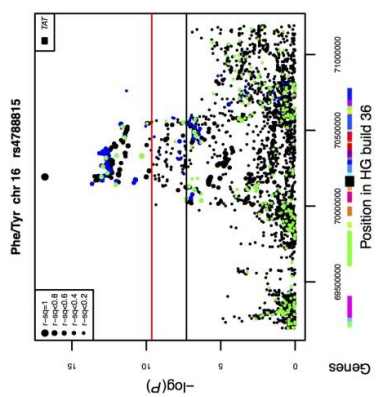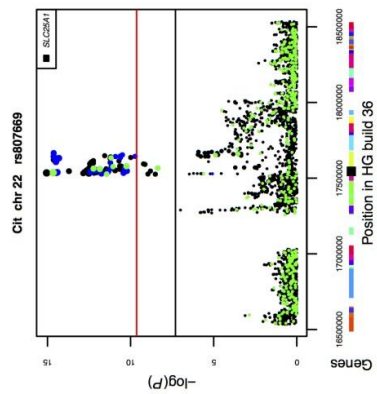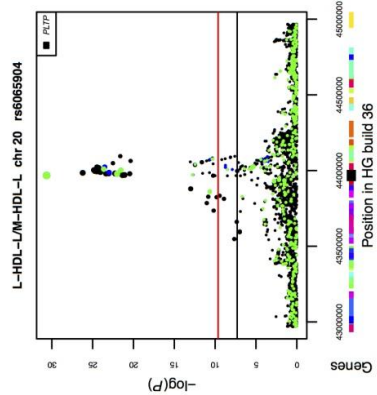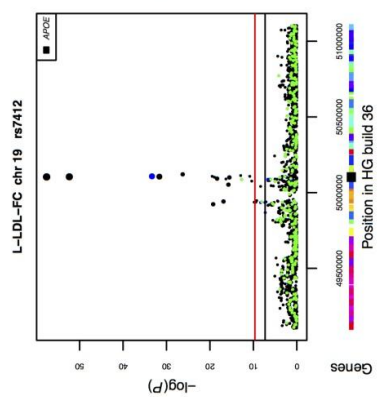

**Supplementary Figure 2.** Quantile-quantile (QQ) plots for the meta-analysis of the lead metabolic traits reported in **Tables 2** and **3**. Genomic control was utilized after the meta-analysis; the meta-analysis inflation factors for the traits shown were between 1.00-1.06. The expected null distribution is plotted along the diagonal as a red line and the distribution of observed *P*-values is plotted as black circles.

**L-LDL-FC**

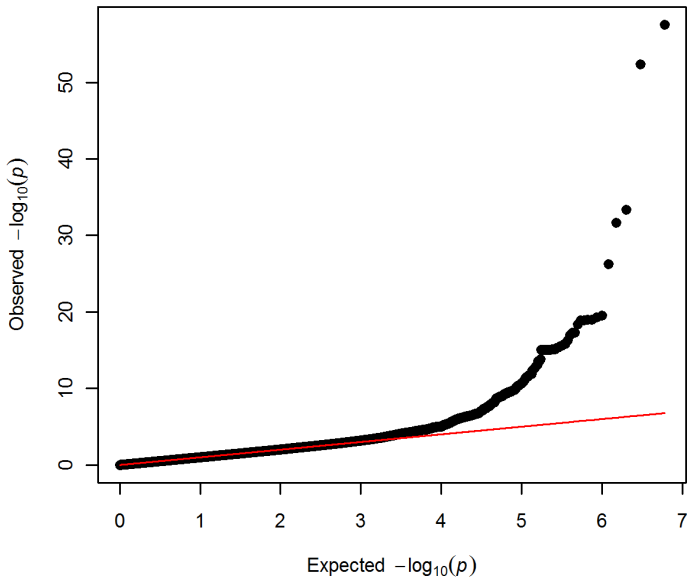

**MobCH**

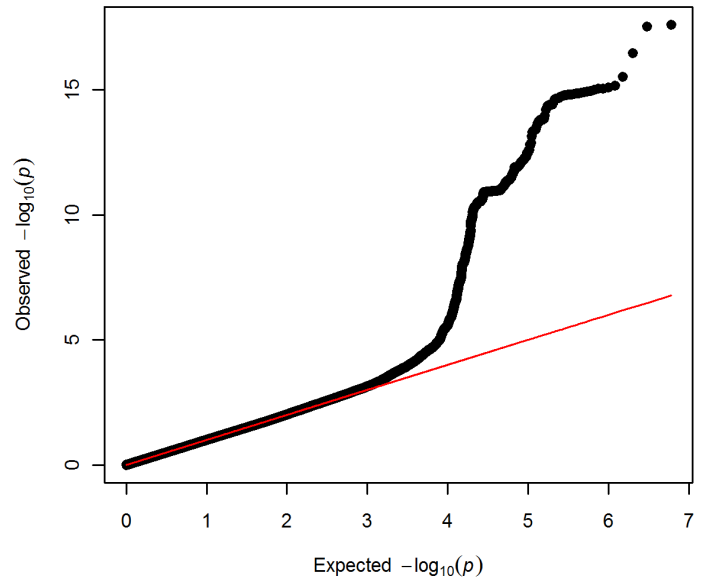

**XL-HDL-CE**

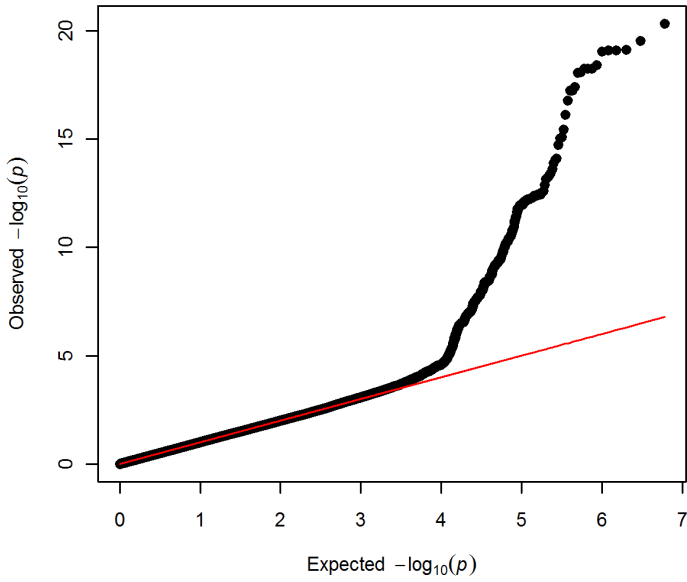

**Ala/Gln**

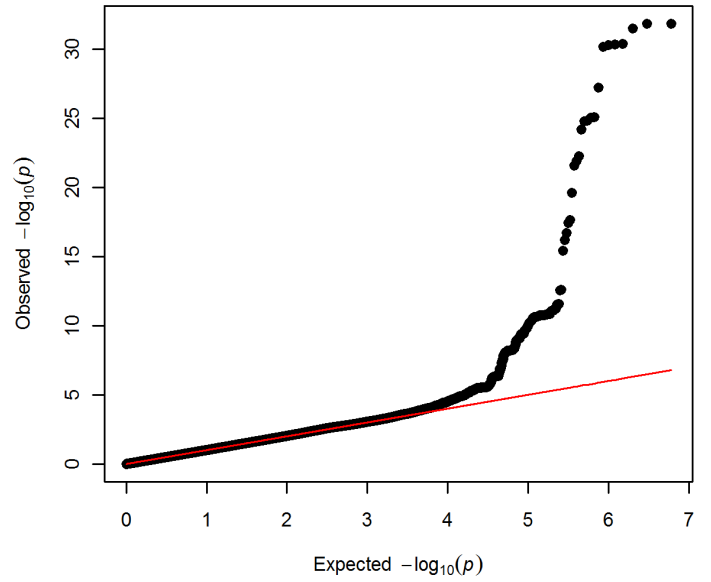

**Ala/Val**

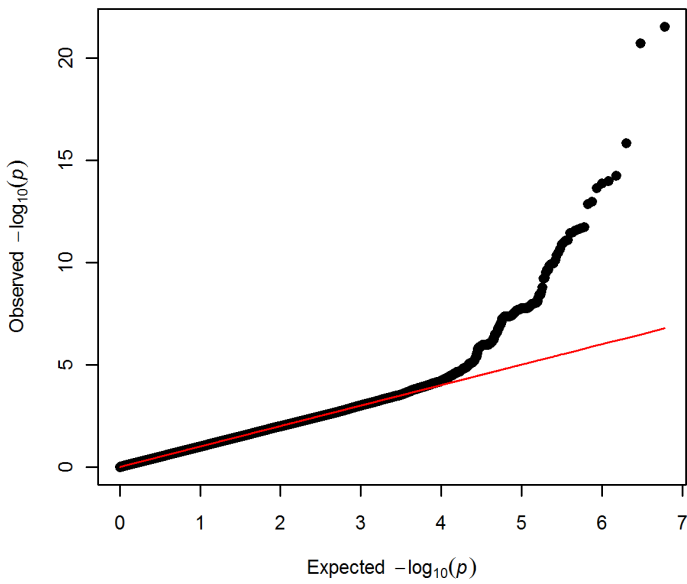

**Glucose**

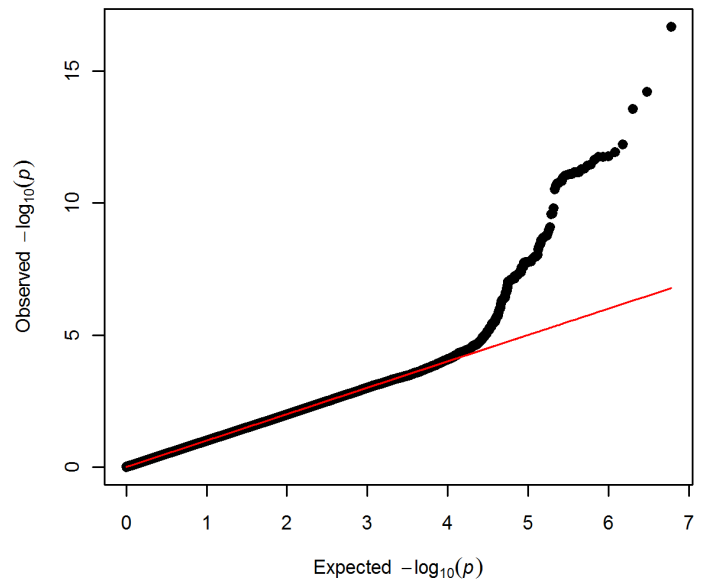

**Albumin**

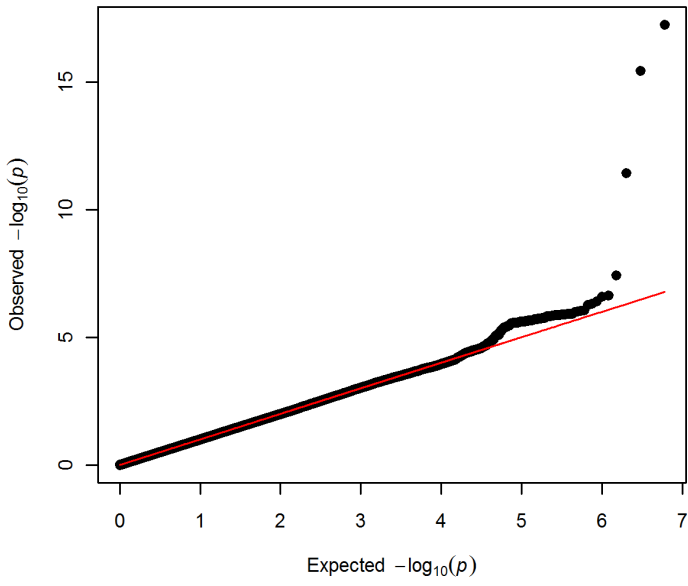

**Fischer's ratio**

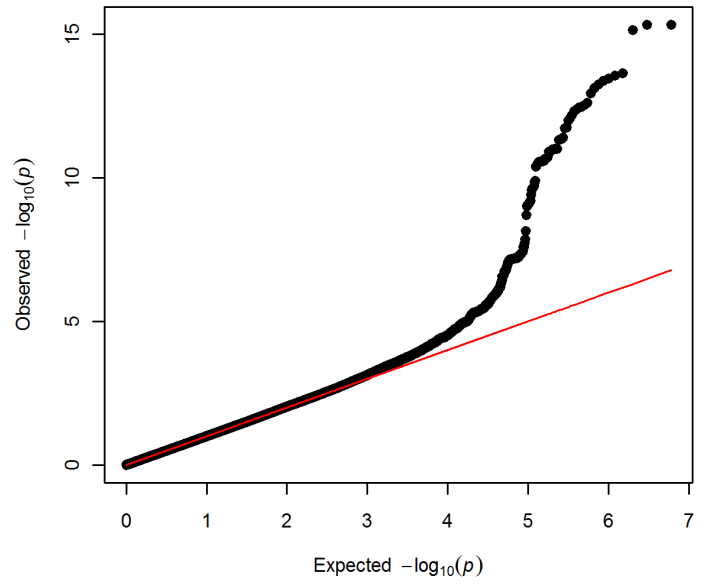

**His/Val**

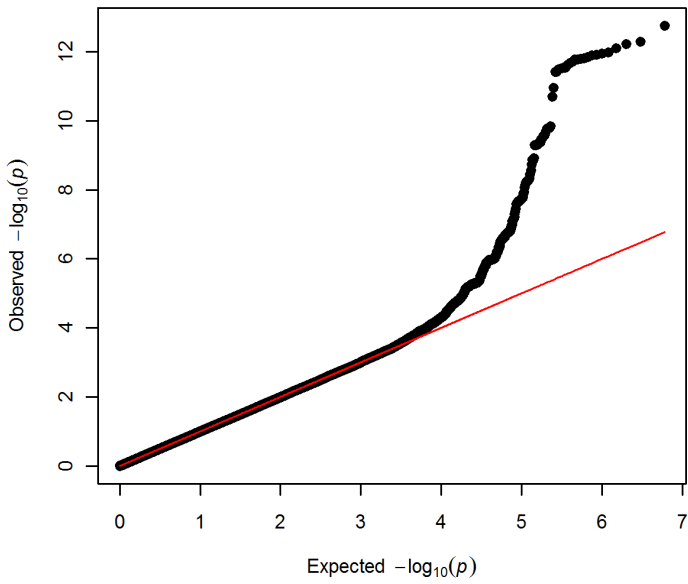

**Phe**

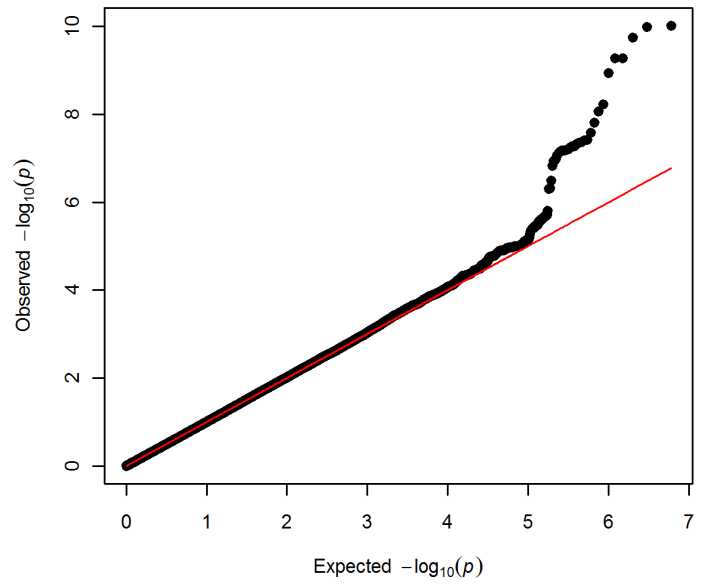

**XXL-VLDL-P**

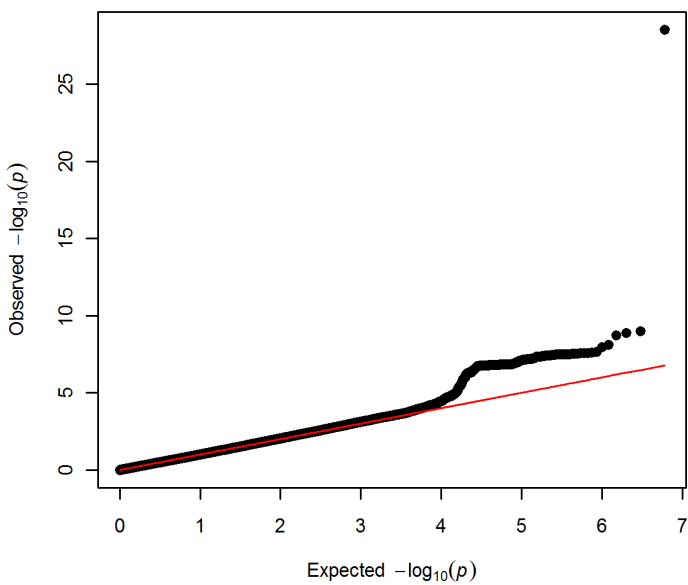

**Ala/Tyr**

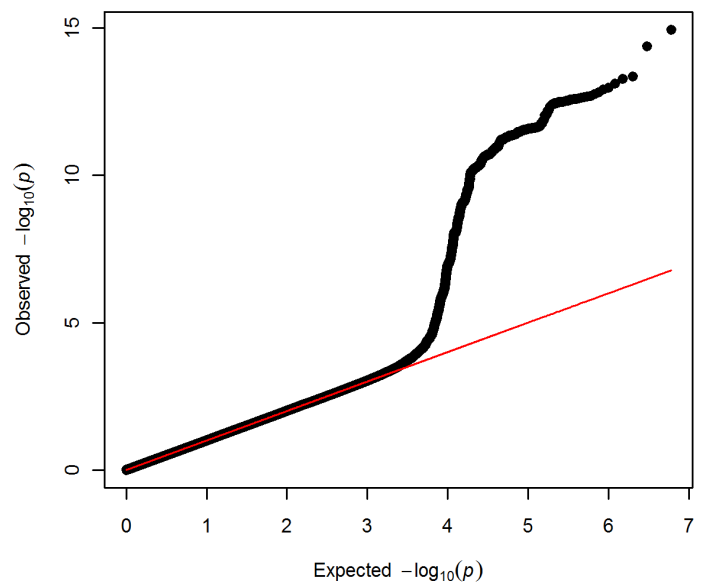

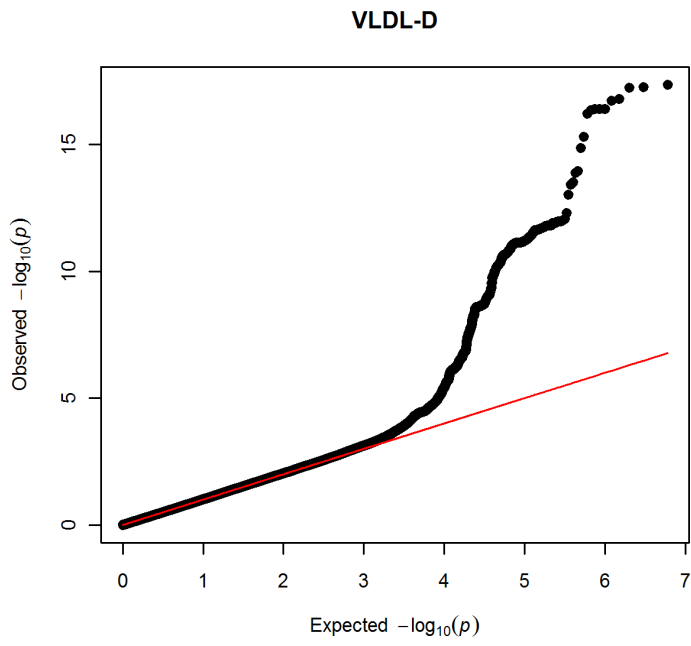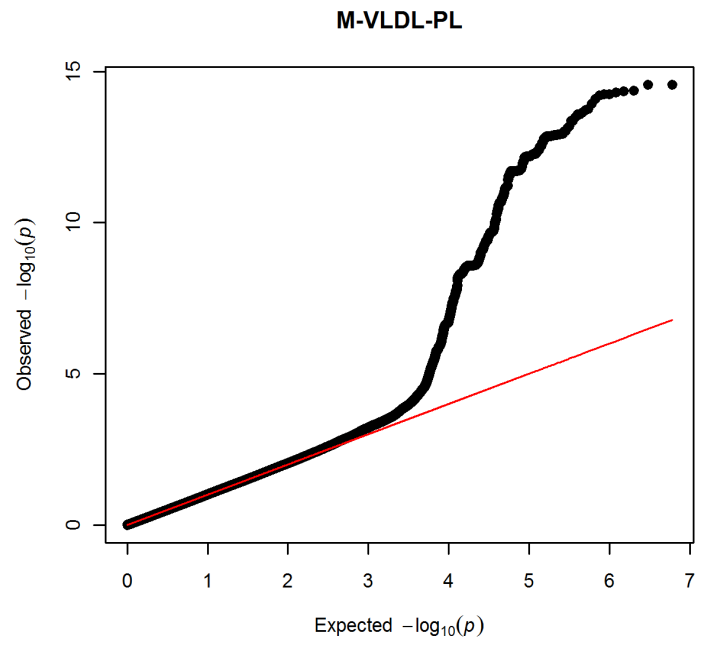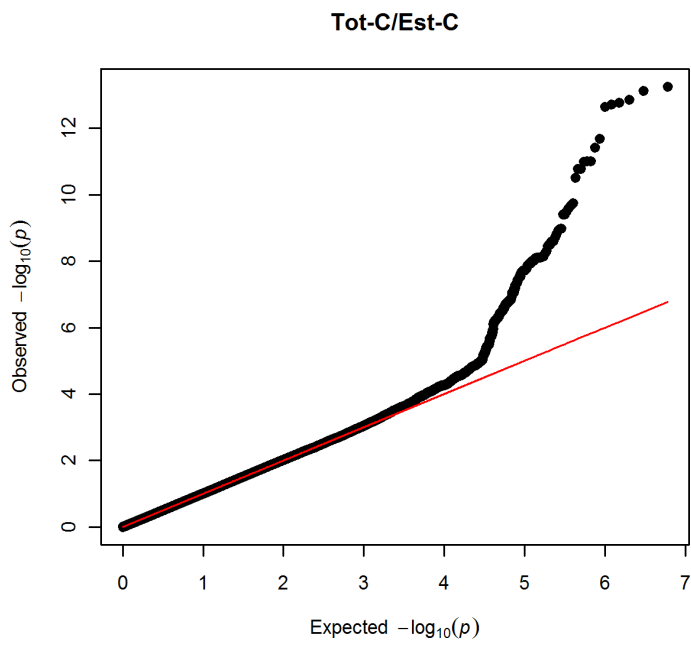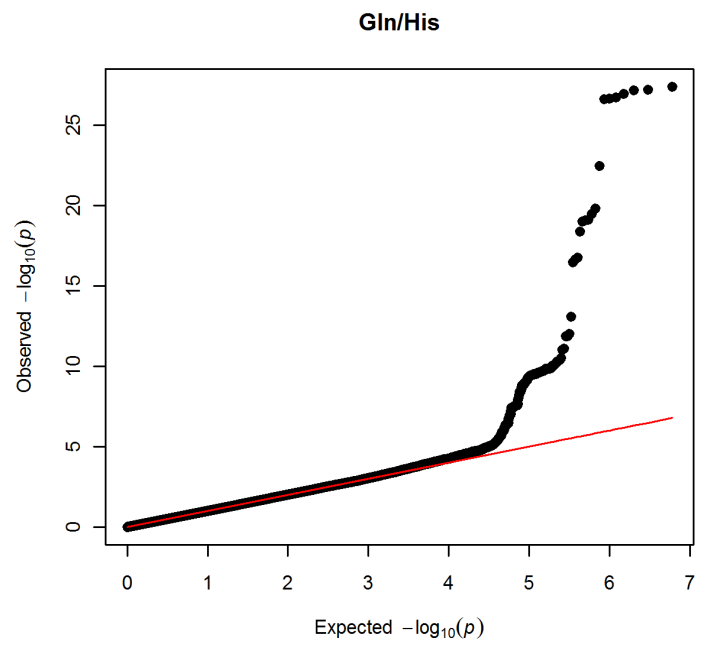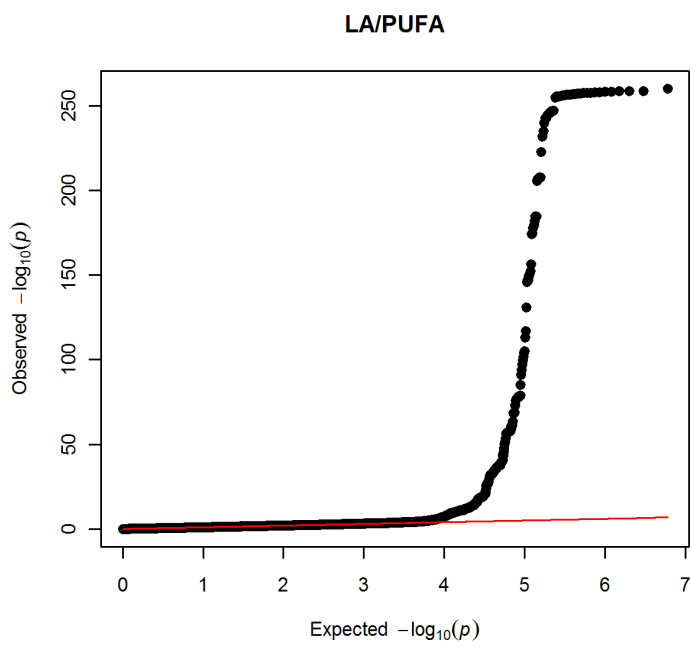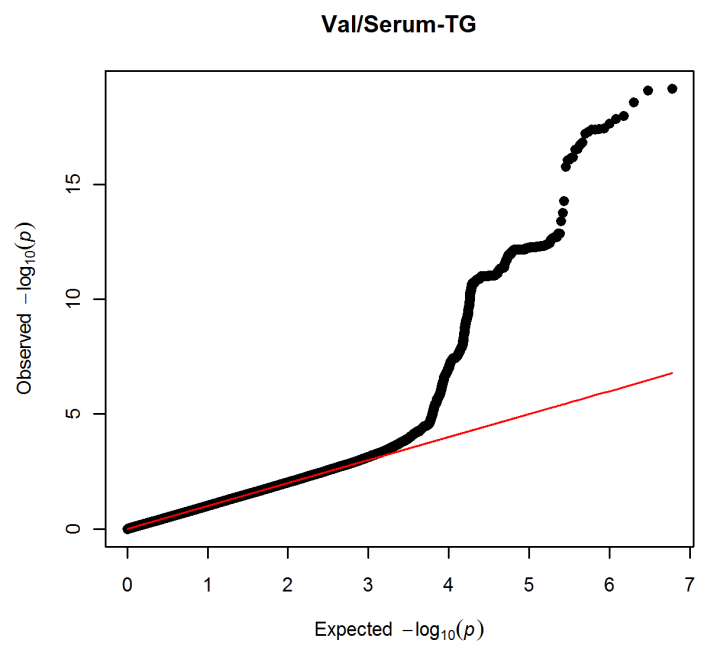

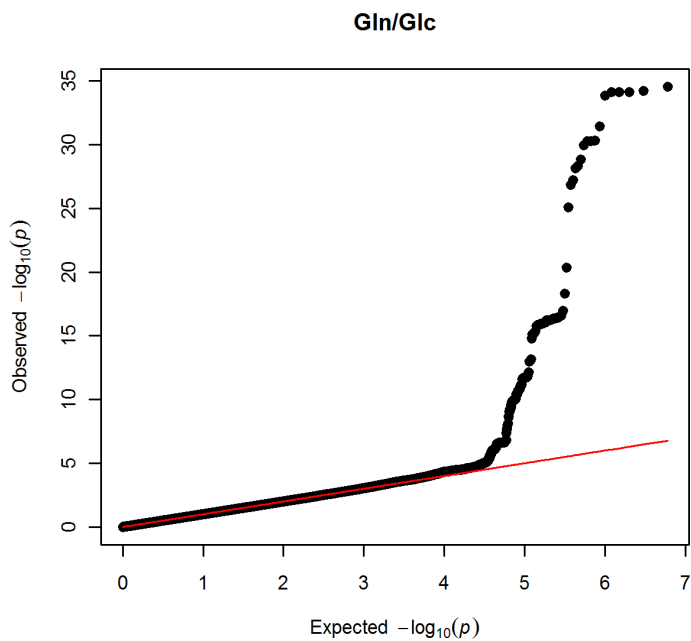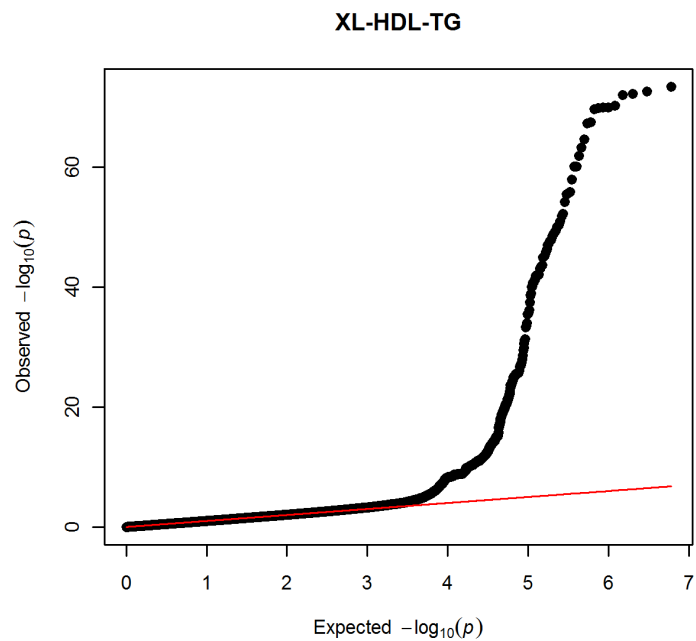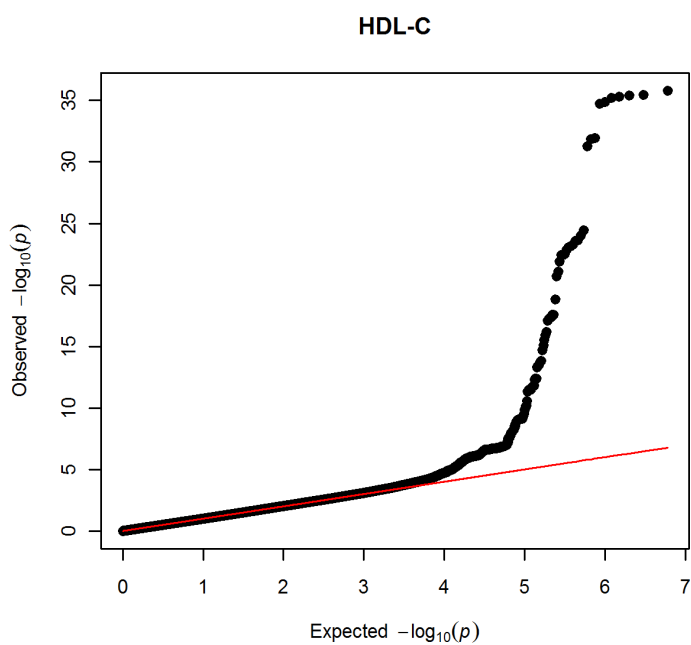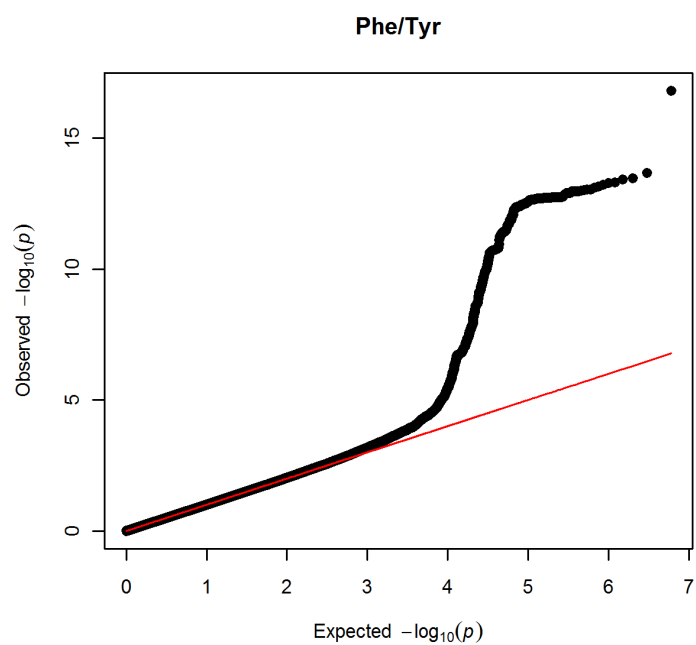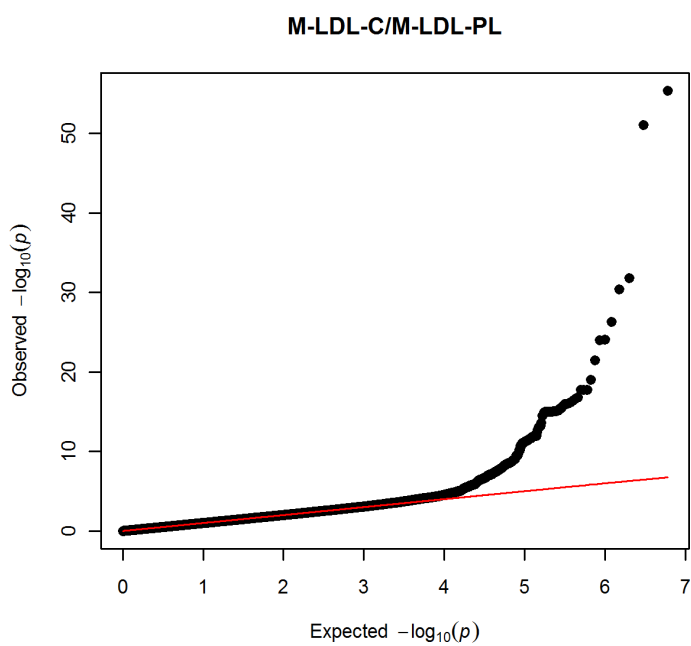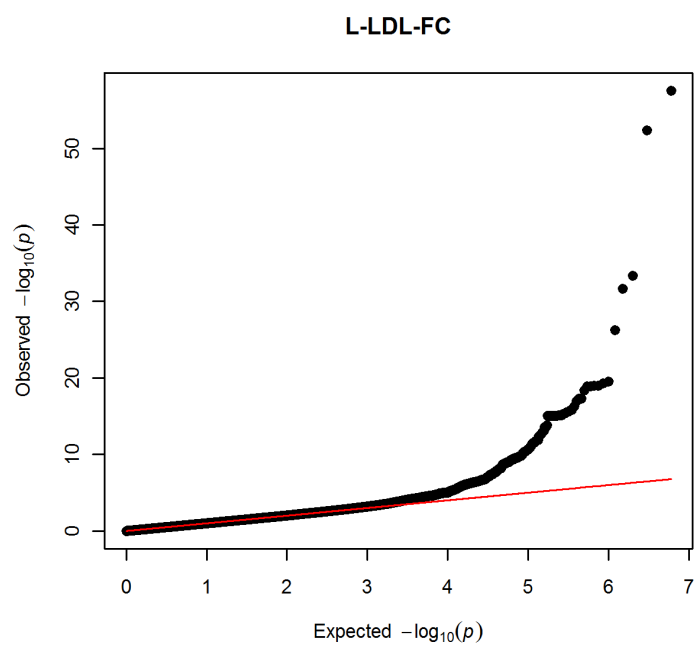

L-HDL-L/M-HDL-L

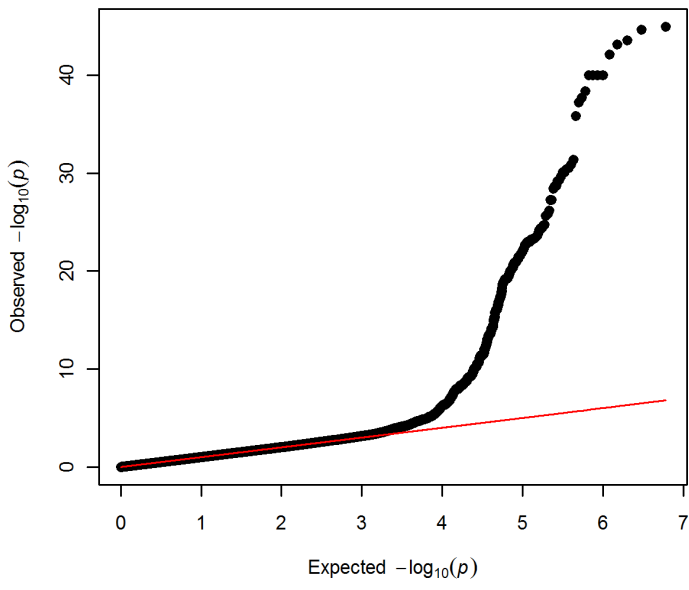

Cit

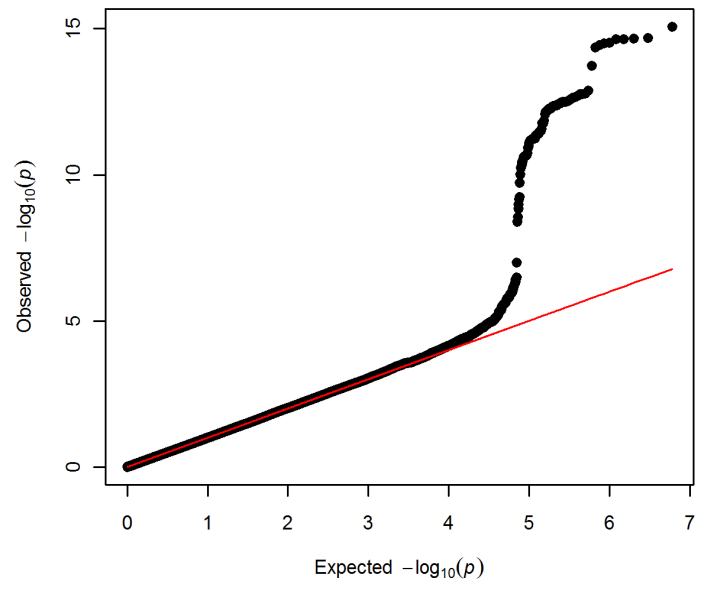

**Supplementary Figure 3.** Box plots for the lead metabolic traits reported in **Tables 2 and 3** plotted as a function of genotype (light shade: non-coded allele homozygotes, medium shade: heterozygotes, dark shade: coded allele homozygotes) and study (NFBC: green, YF: blue, HBCS: red, GenMets: turquoise, DILGOM: yellow) in chromosomal order. The plots present the untransformed and unadjusted trait values. The numbers of samples for each genotype in each cohort are indicated above the boxes. The boxes contain 50 % of the observations extending from 1st quartile (Q1) to 3rd quartile (Q3). The horizontal line indicates the median. The ends of the whiskers indicate the minimum and maximum of the data or, if extreme values are present, are drawn to the observation that is closest to, but no more than, 1.5 times the inter-quartile range (Q3-Q1) from the end of the box. The observations more distant than this are shown individually on the plots.



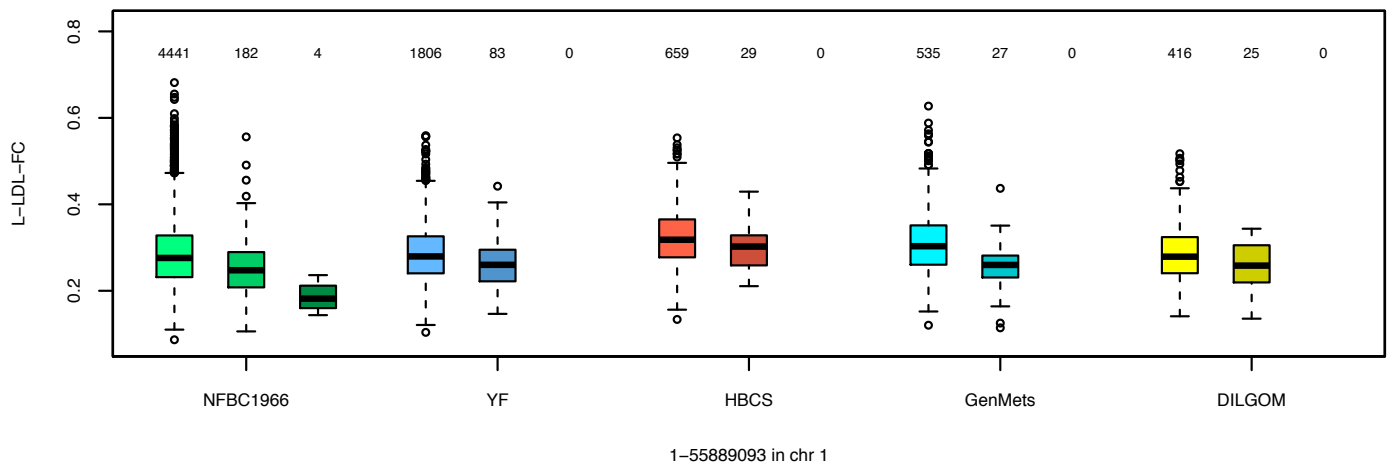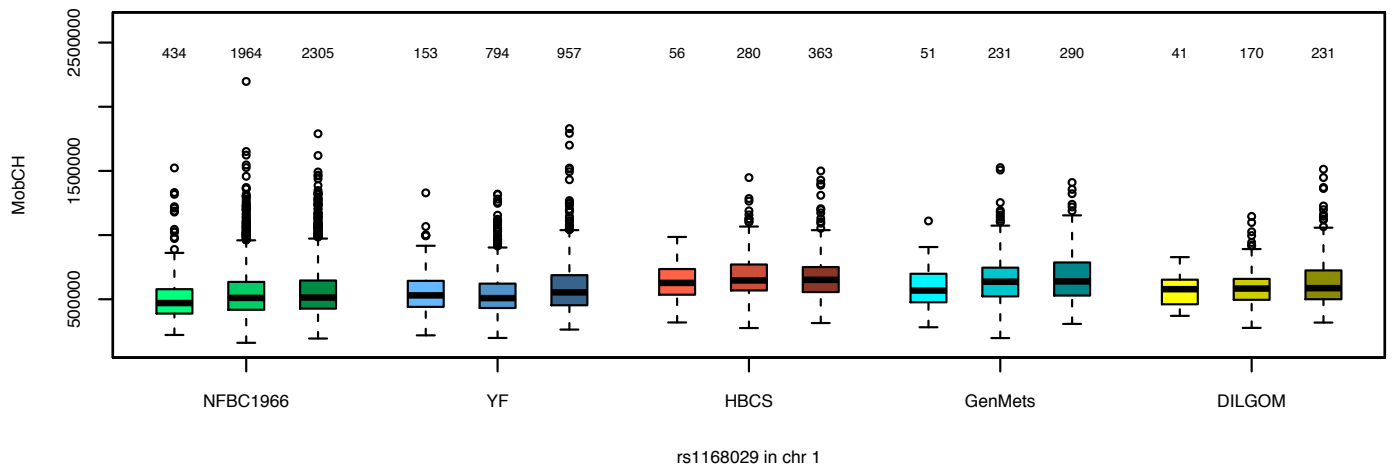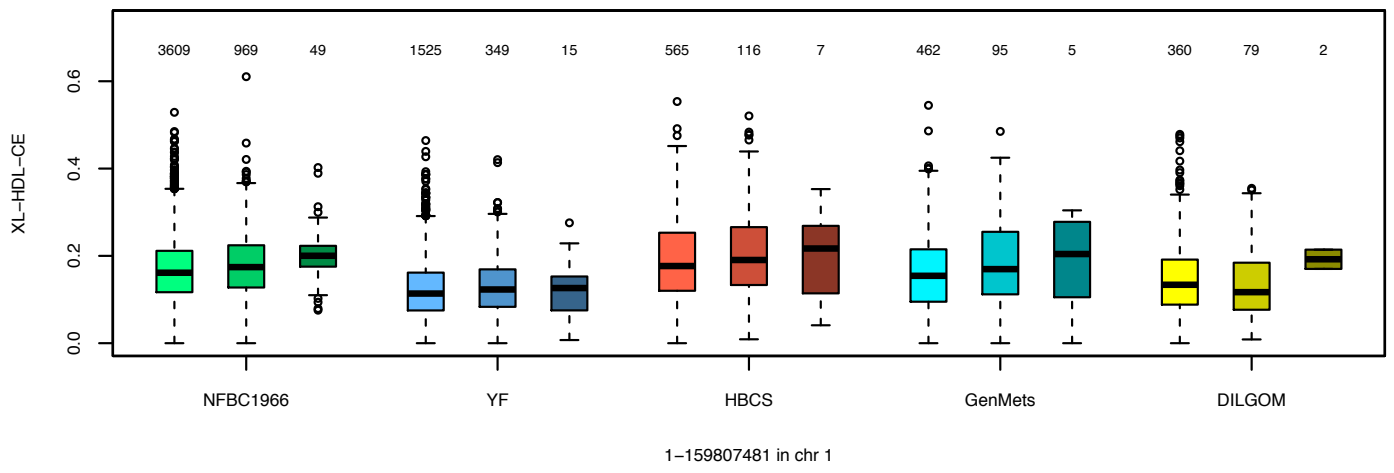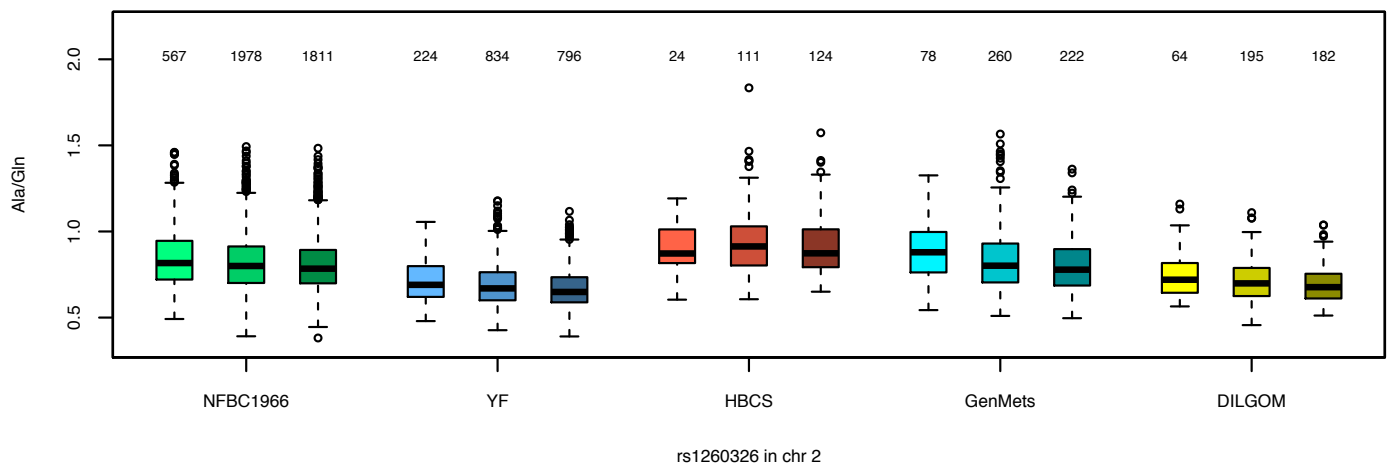

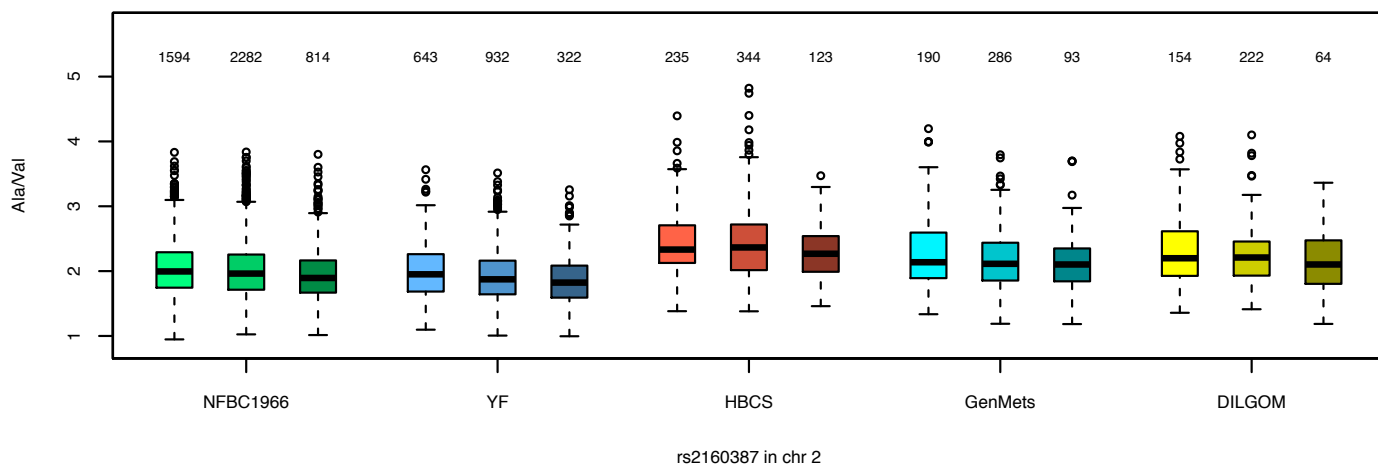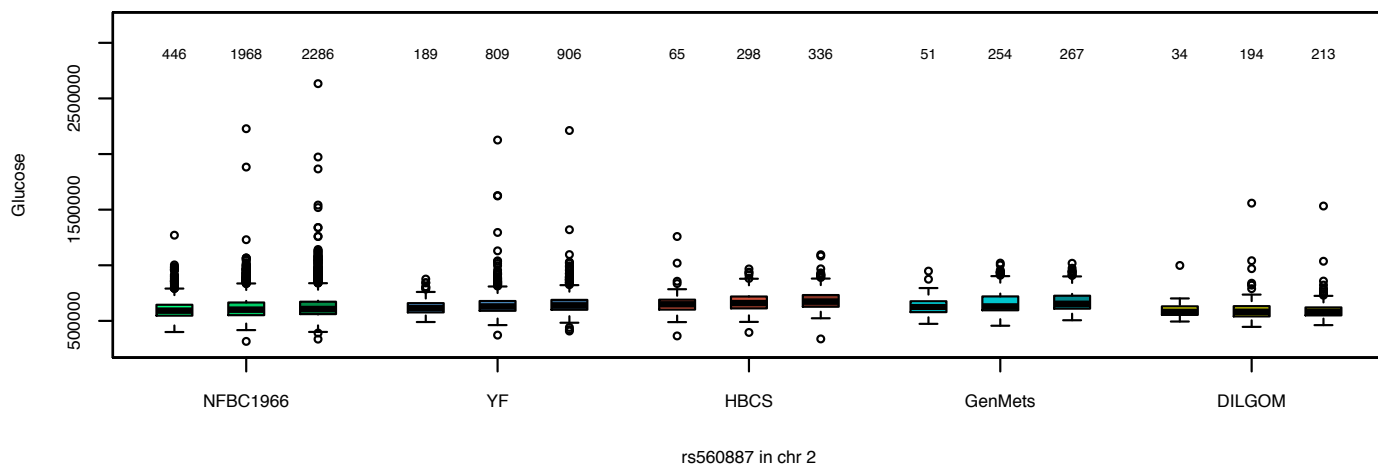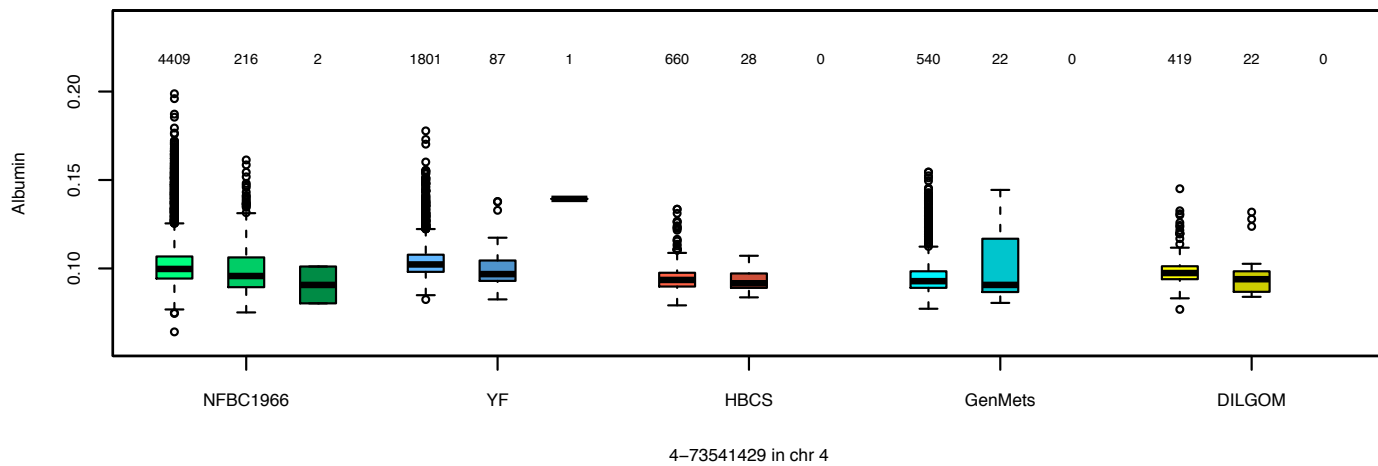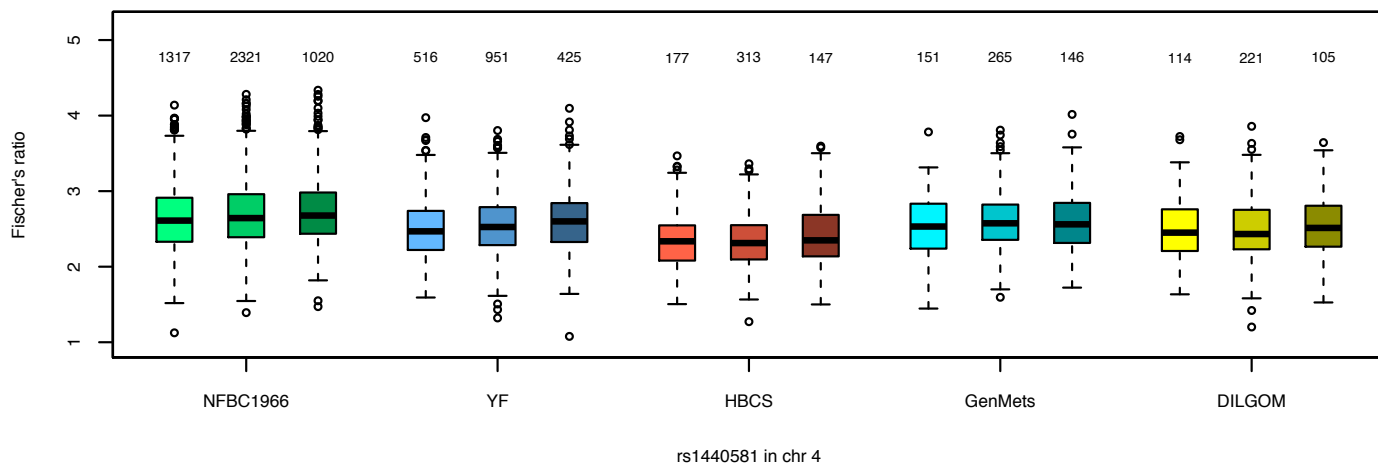

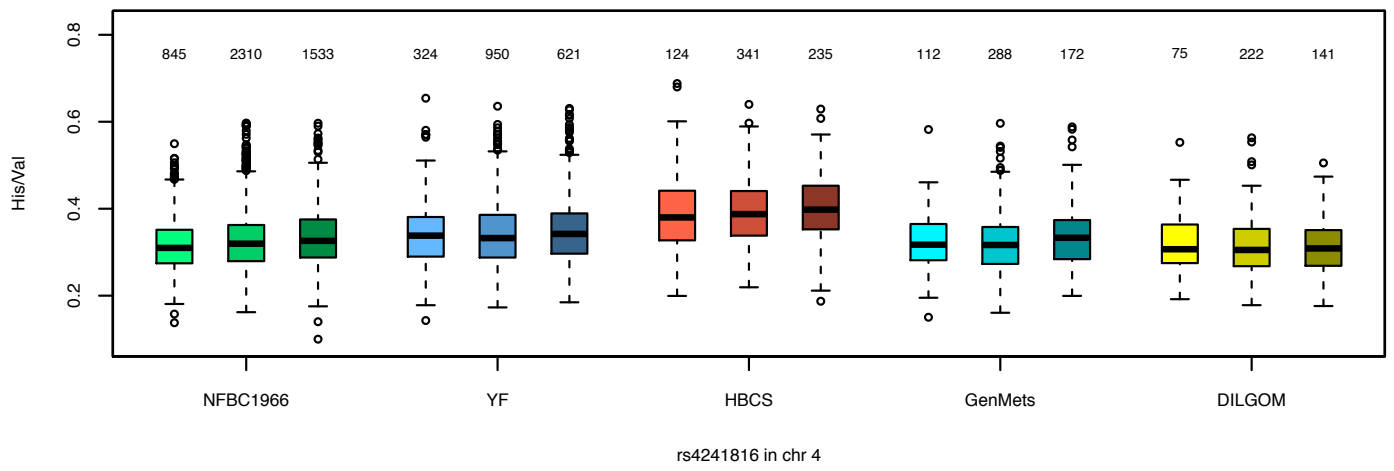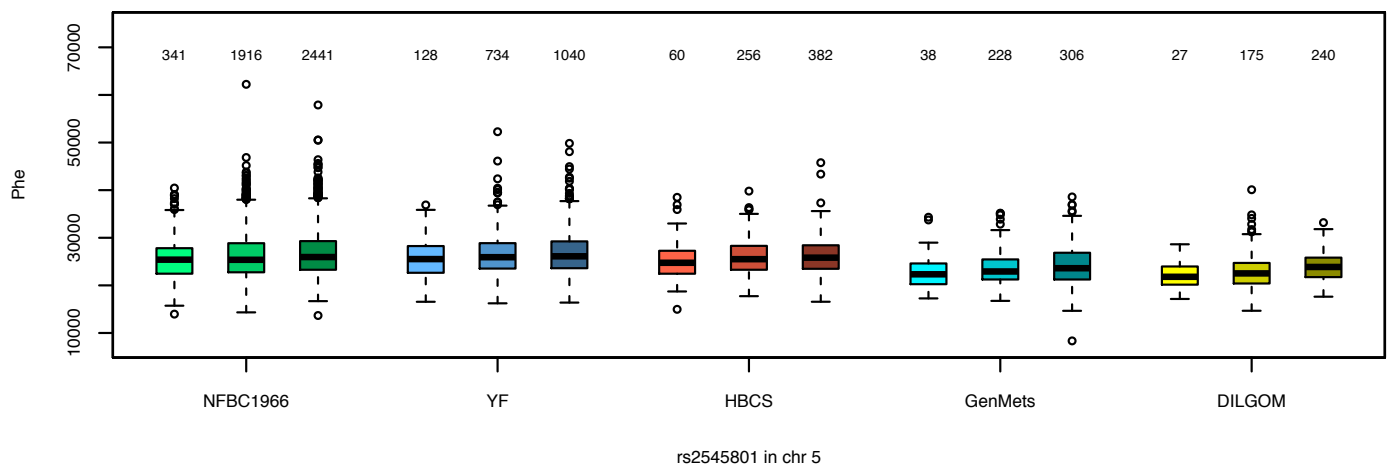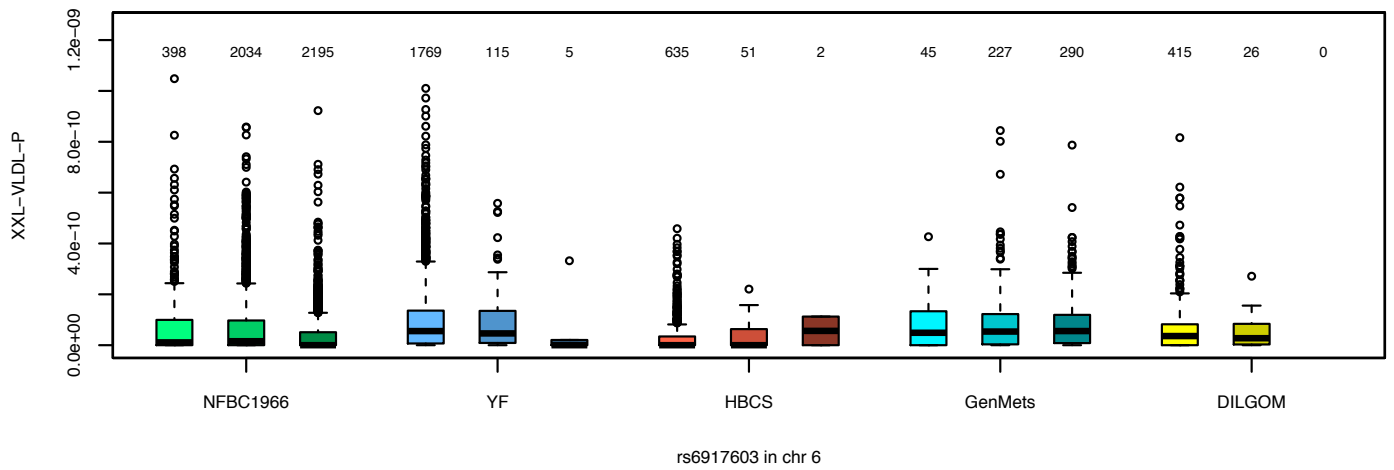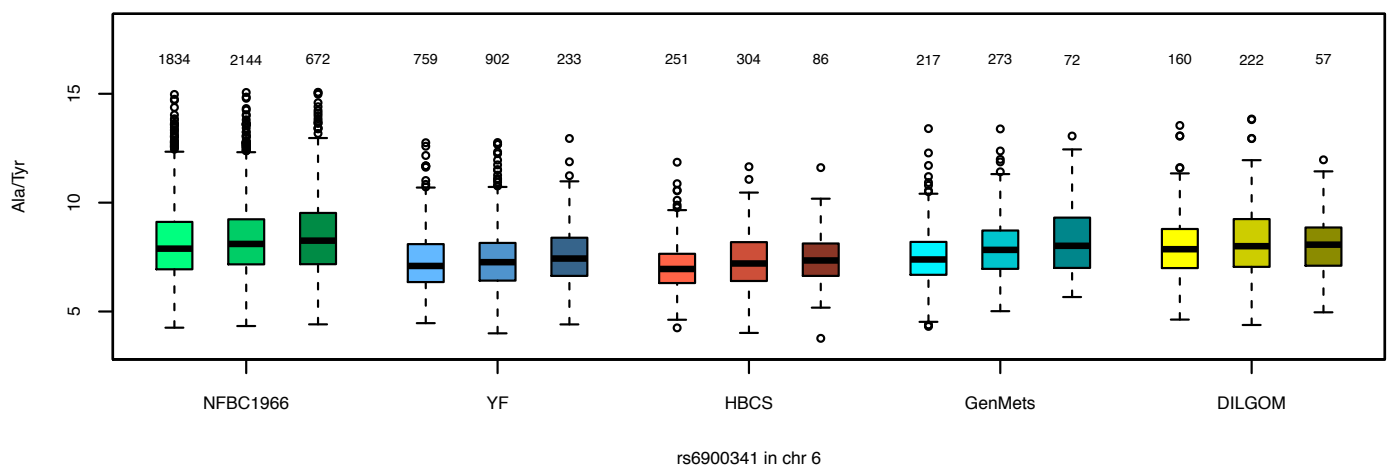

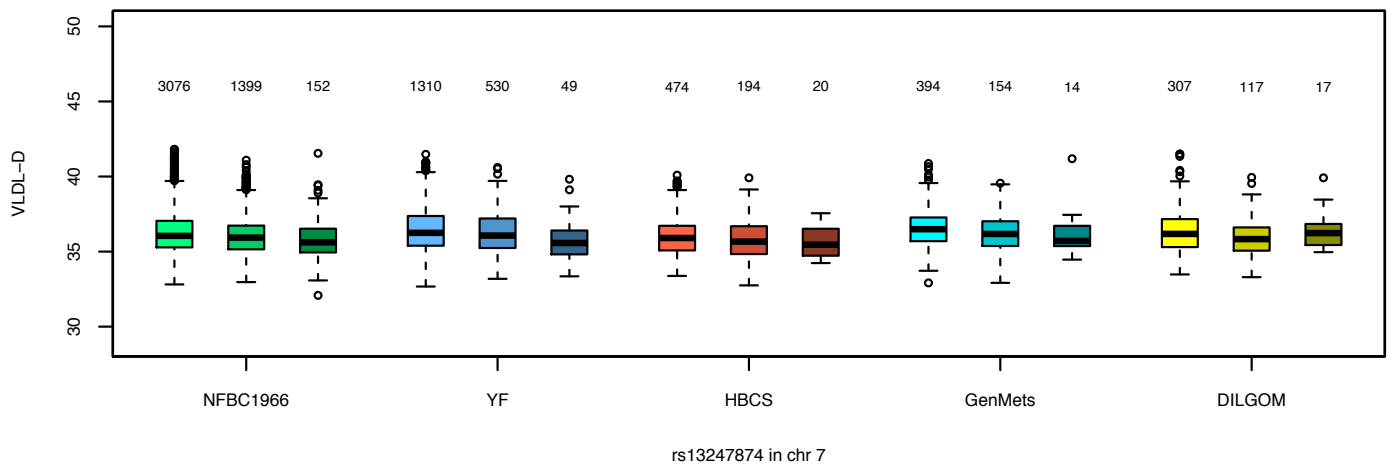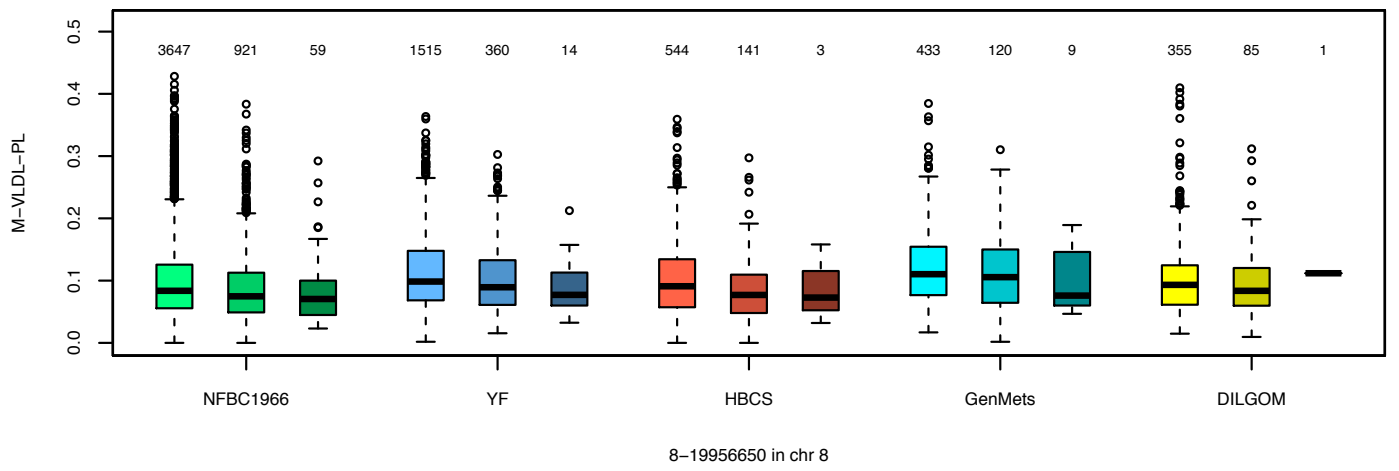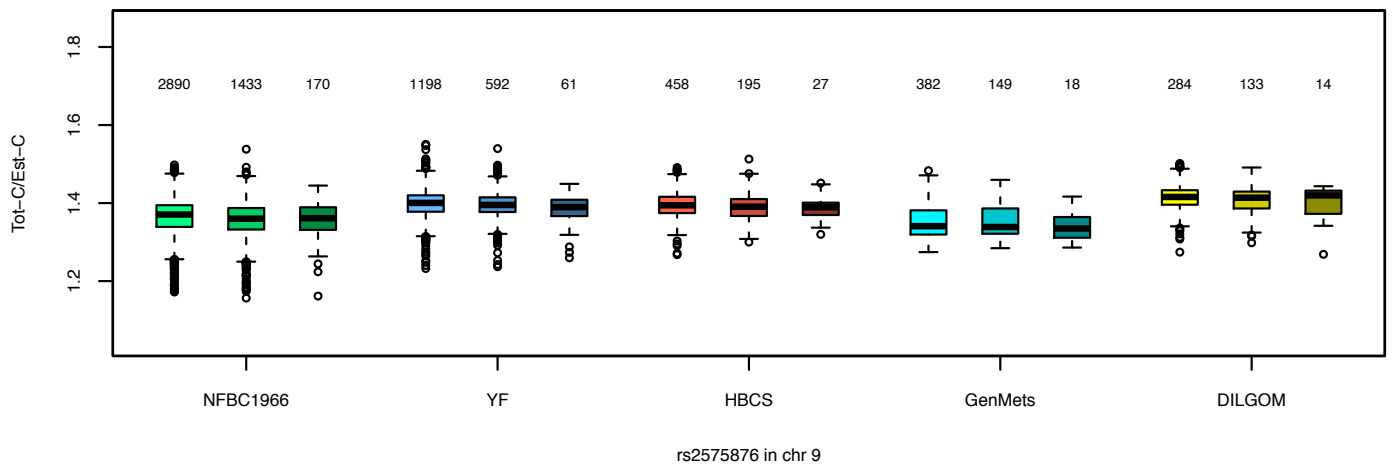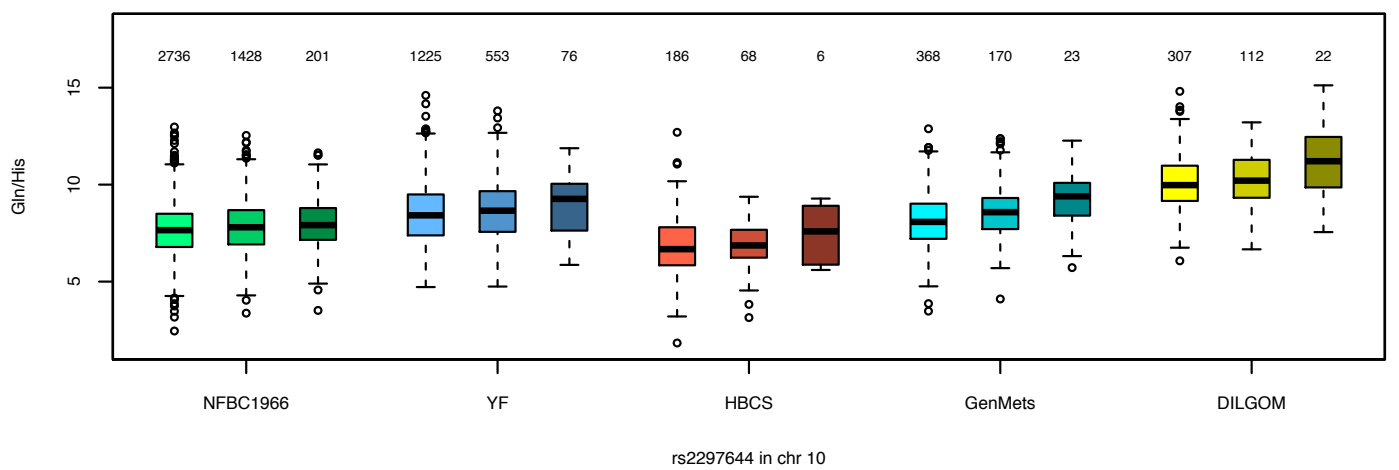

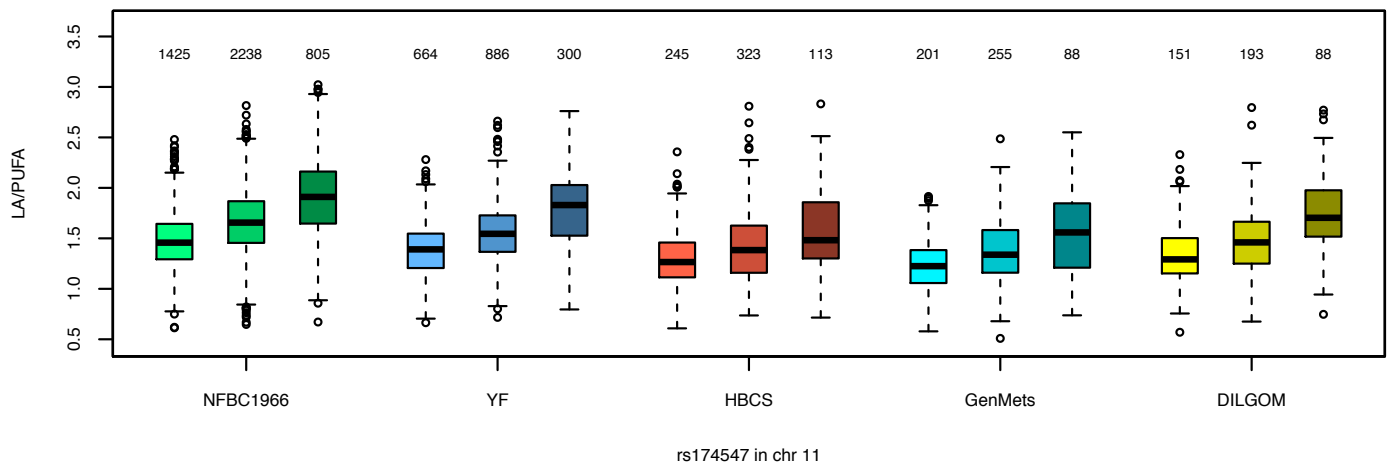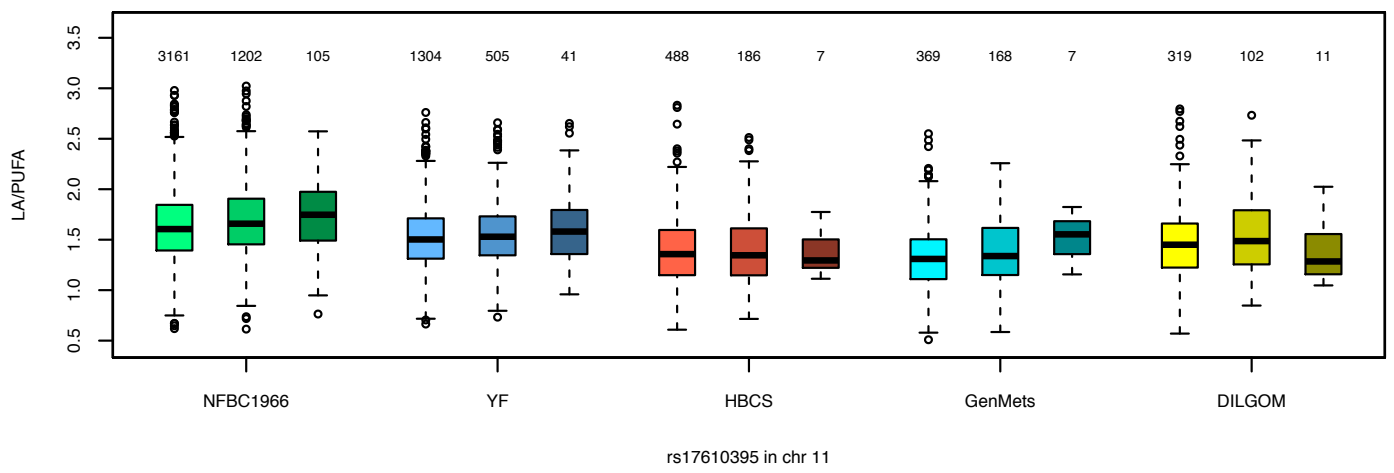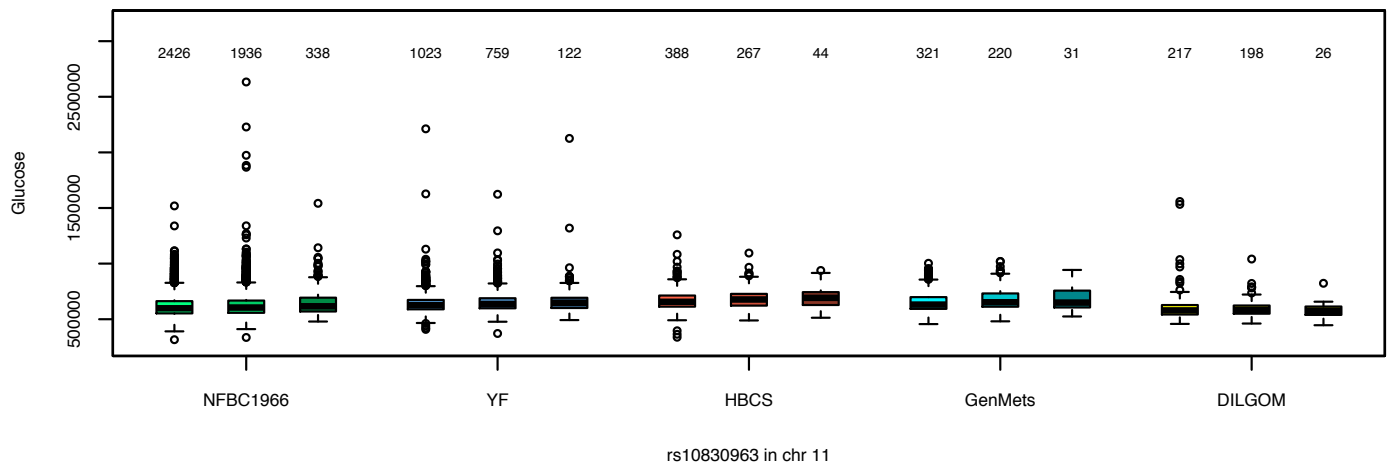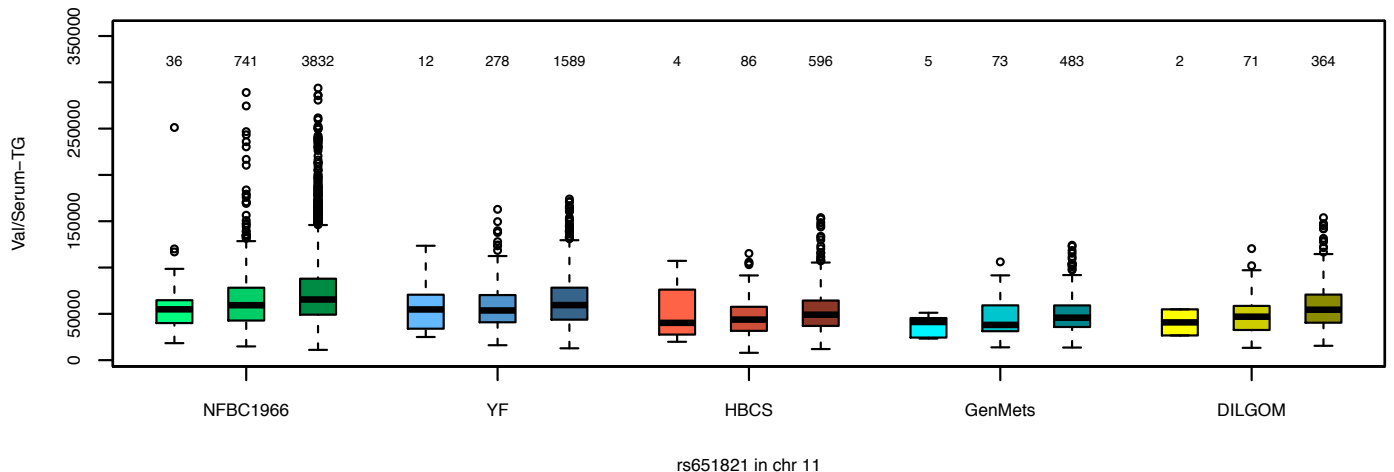

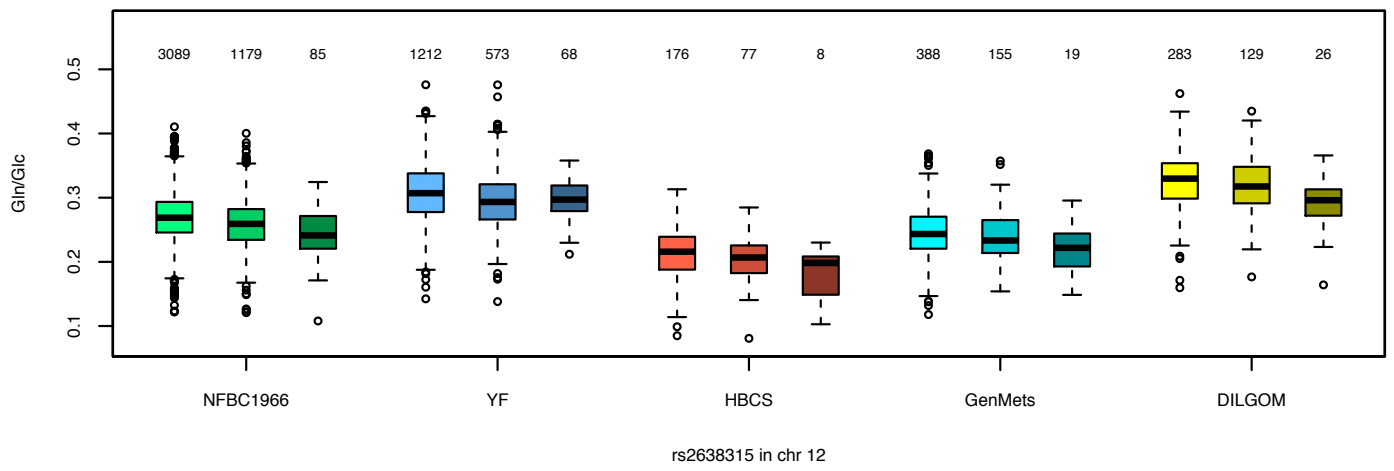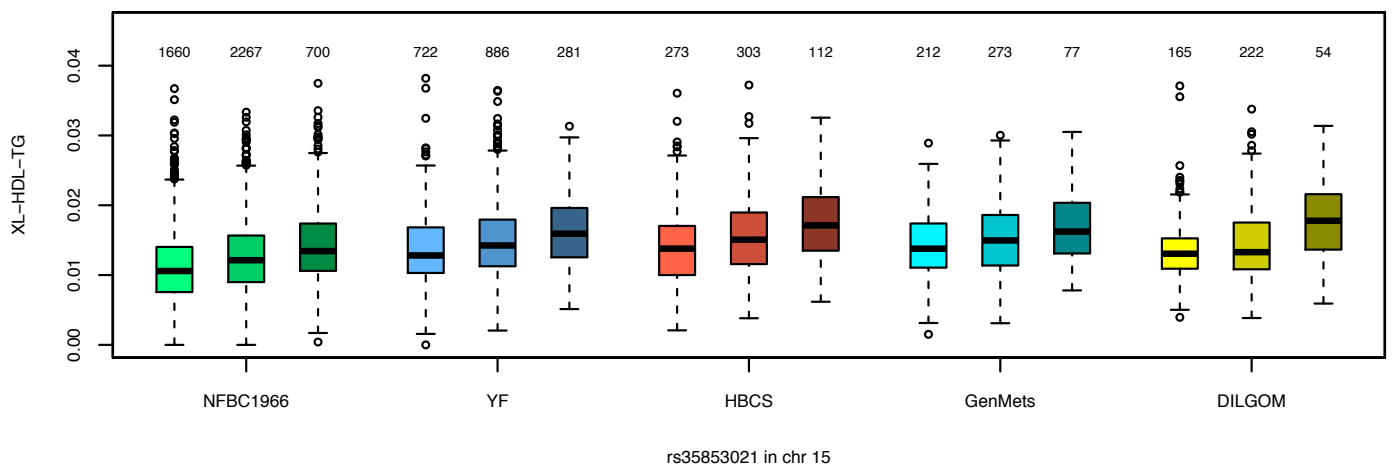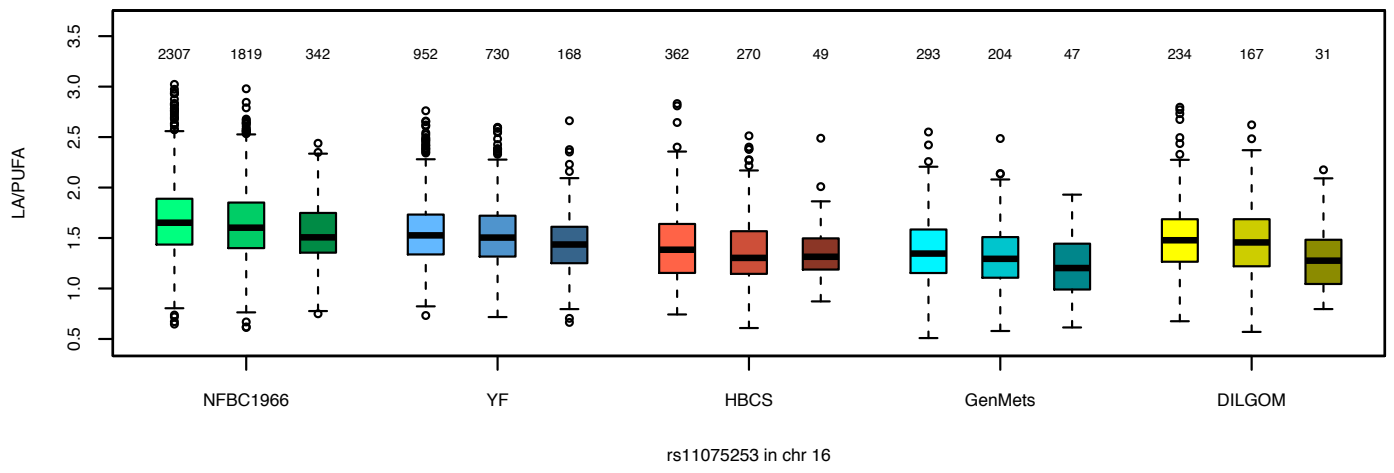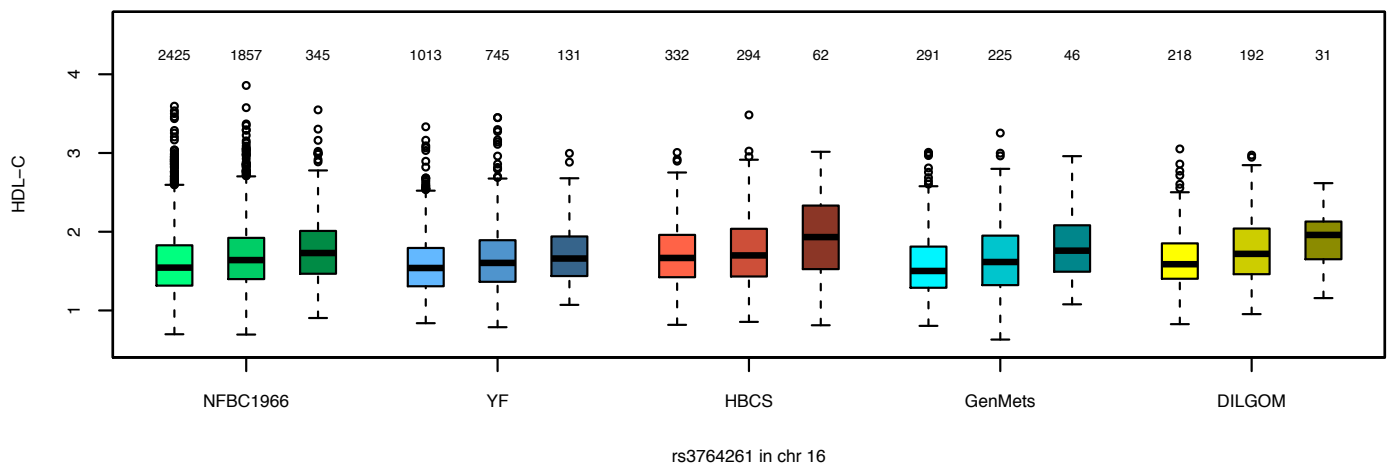

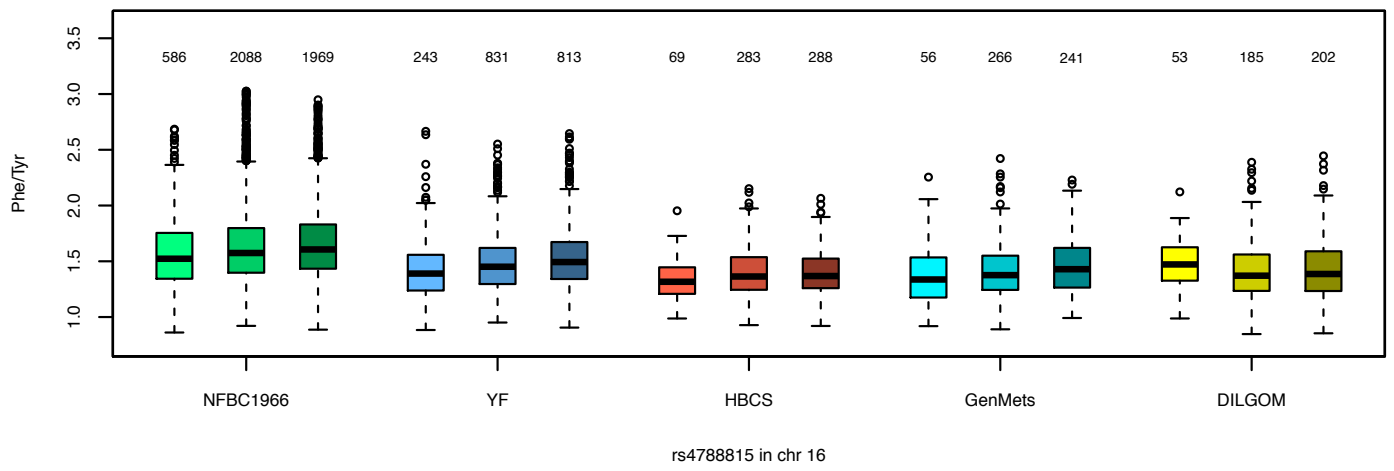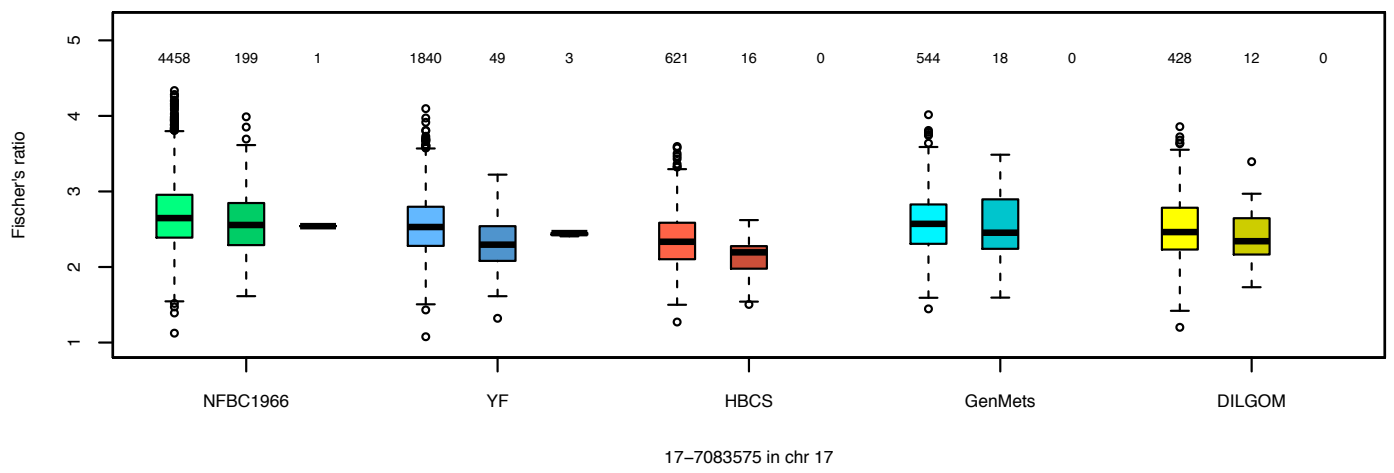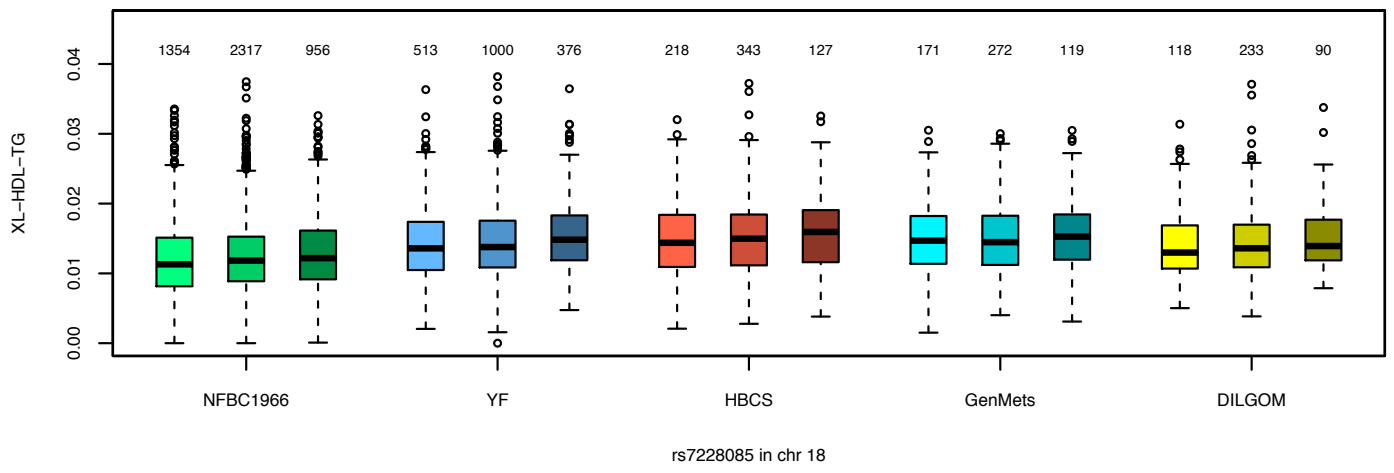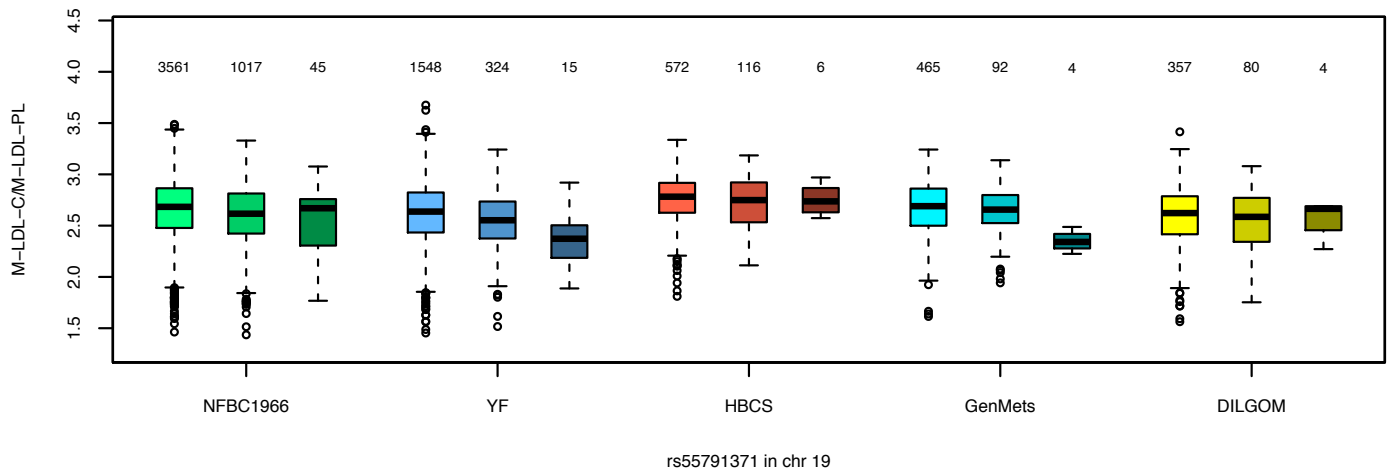

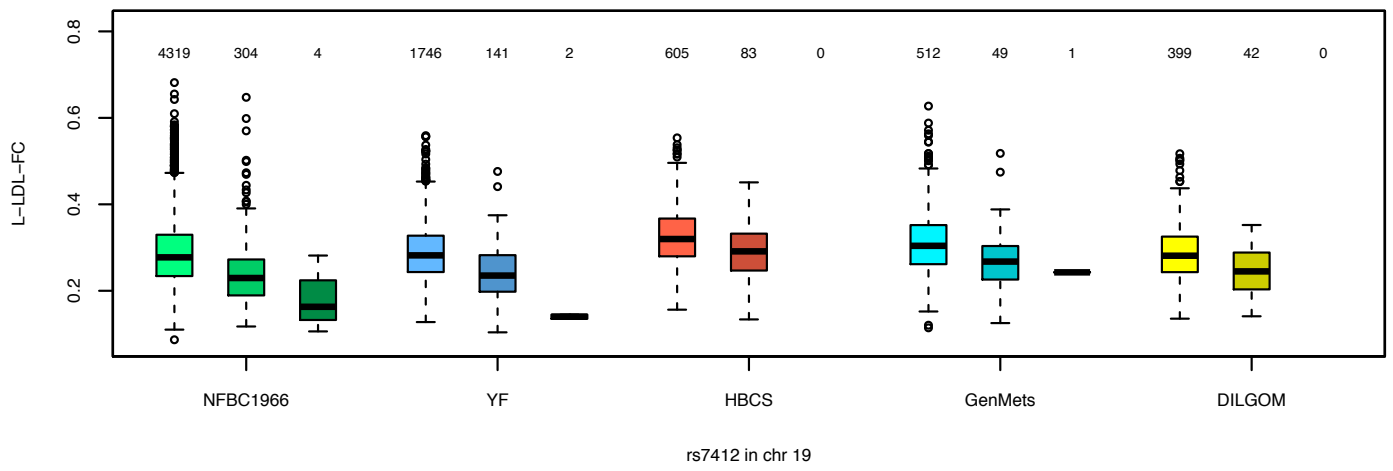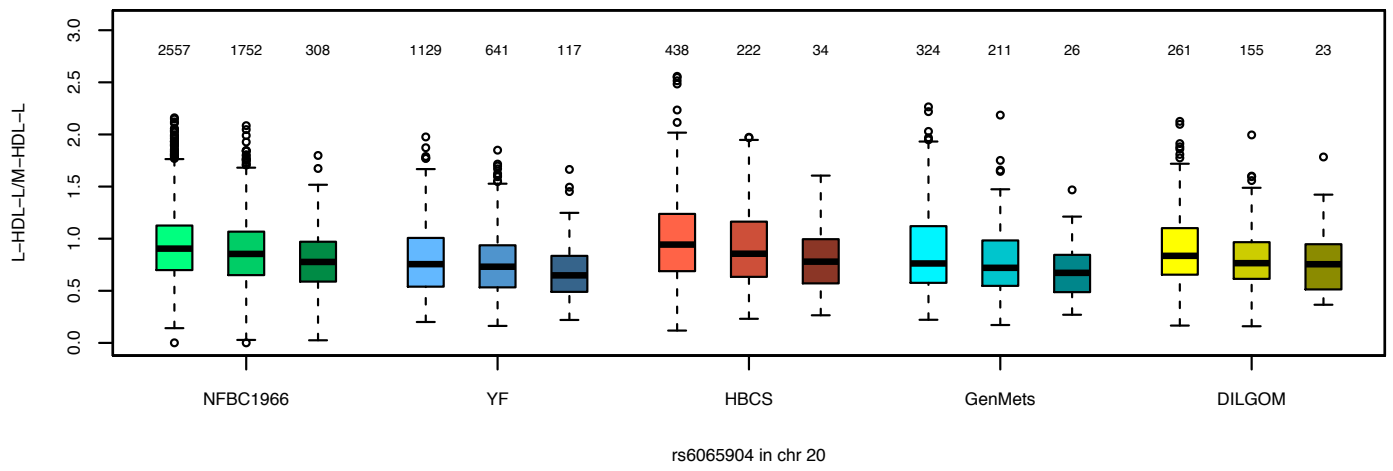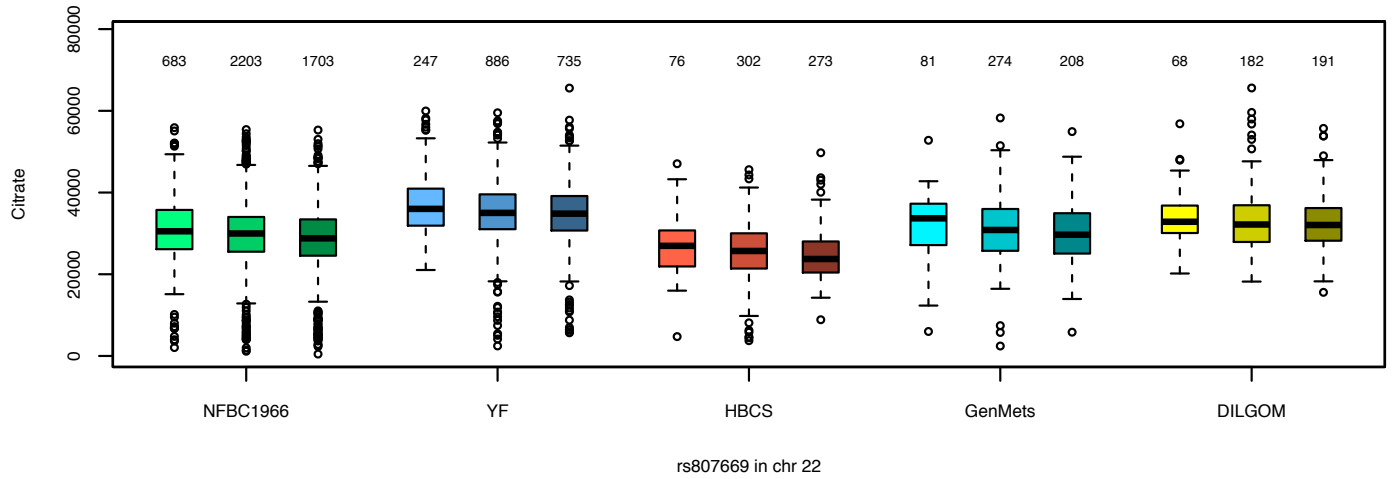



**Supplementary Figure 4.** Comparison of SNP genotypes which were imputed using genome wide data and genotyped in Cardiometabochip. Only SNPs which had imputation info greater than 0.4 were included. MAF = Minor allele frequency.

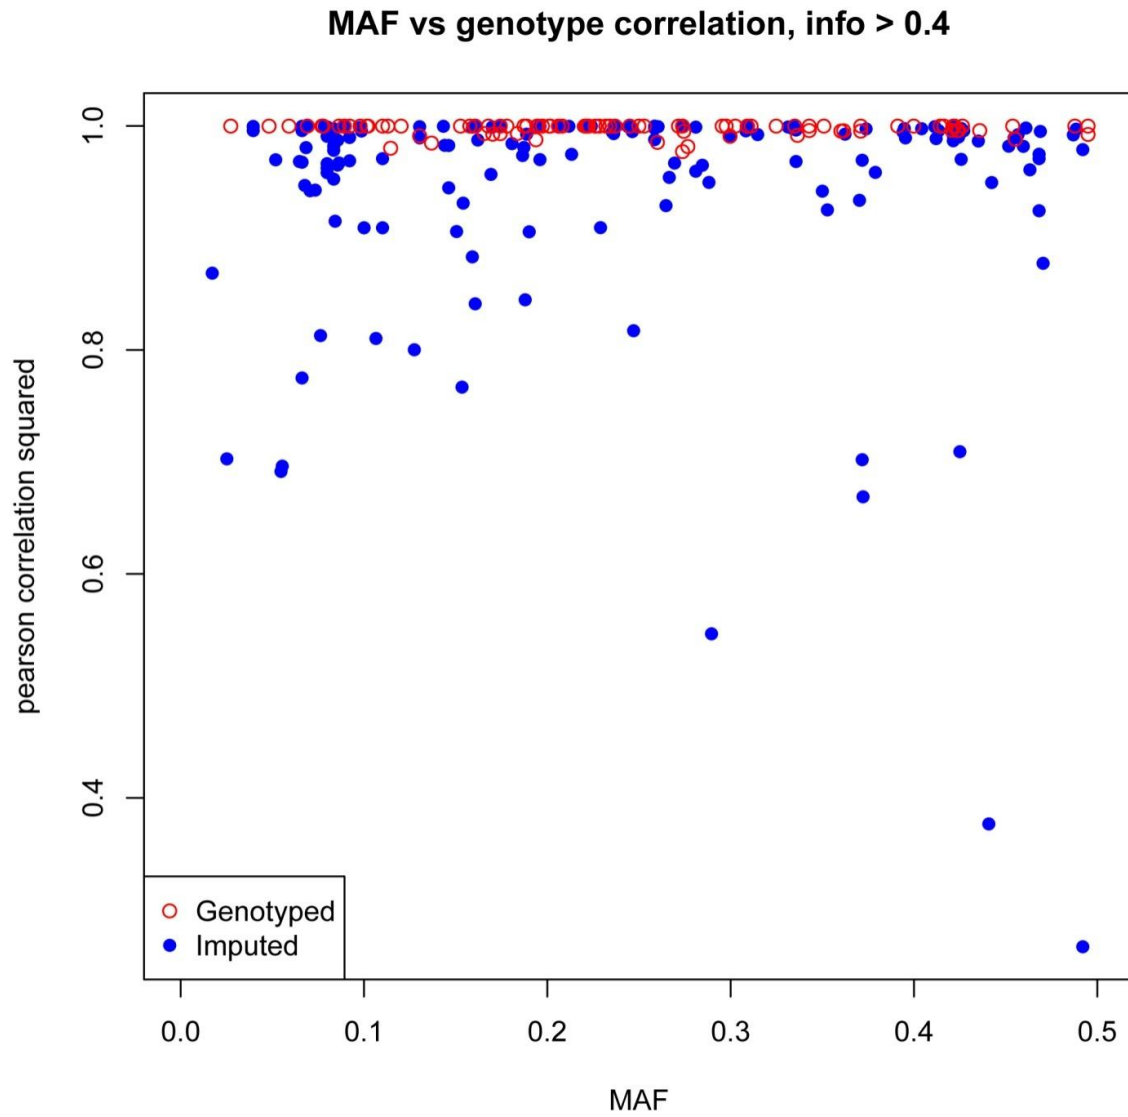

# SUPPLEMENTARY NOTE

## Study samples and phenotypes

The five studies included in the meta-analysis are described in **Table 1** in the main text and in further detail below. In addition, a twin study sample was available for estimating the heritabilities of the metabolomic measures. All participants provided informed consent, and local ethical committees at participating institutions approved individual study protocols.

## Study descriptions

### 1. FINRISK-07 (DILGOM)

The sample has been described earlier by Inouye *et al.*<sup>1</sup>. In brief, the subjects (ages between 25 and 74) participated in the DIetary, Lifestyle and Genetic determinants of Obesity and Metabolic syndrome study (DILGOM) in the Helsinki region. DILGOM is a part of the FINRISK 2007 survey. FINRISK collections are performed every five years and the data are used for research projects and for national health monitoring purposes.

### 2. Helsinki Birth Cohort Study (HBCS)

The primary aim of the Helsinki Birth Cohort Study was to assess how growth and environmental factors acting during the fetal period and childhood are related to health in adult life. A particular focus has been the study of the early life origins of cardiovascular disease and its risk factors. Participants were born between 1934 and 1944 in Helsinki. An essential component of the project was a detailed clinical examination of over 2500 volunteers, parts of which provided data included in this study<sup>2</sup>.

### 3. Health2000 GenMets Study (GenMets)

The GenMets sample has been described in detail previously by Perttilä *et al.*<sup>3</sup>. Individuals in GenMets are metabolic syndrome cases and matched controls drawn from the Finnish Health2000 study, a population health survey. Persons with known diabetes were excluded. Participants included in the present study had participated in an additional survey which included drawing fasting serum samples.

#### **4. Northern Finland Birth Cohort 1966 (NFBC1966)**

The NFBC1966 has been described in detail previously by Rantakallio<sup>4</sup>. The original study design focused on factors affecting pre-term birth, low birth weight, and subsequent morbidity and mortality. Mothers living in the two northern-most provinces of Finland were invited to participate if they had expected delivery dates during 1966. Individuals still living in the Helsinki area or Northern Finland (N = 5923) were asked at age 31 to participate in a detailed biological and medical examination as well as a questionnaire.

#### **5. Cardiovascular Risk in Young Finns Study (YF)**

The Cardiovascular Risk in Young Finns Study (YF) is a population based prospective cohort study. It was conducted at five medical schools in Finland (Turku, Helsinki, Kuopio, Tampere and Oulu), with the aim of studying the levels of cardiovascular risk factors in children and adolescents in different parts of the country. The latest follow-up was conducted in 2007. The serum samples for this metabolomics study were collected at this latest follow up. The study and data collection protocols have been described in detail by Raitakari *et al.*<sup>5</sup>.

#### **6. Finnish twin cohort**

Heritability analyses in this study utilized twin pairs (221 MZ and 340 DZ pairs) from the FinnTwin12 (FT12) and FinnTwin16 (FT16) cohort studies. In brief, the FT12 is a population based-cohort longitudinal study of five consecutive birth cohorts of Finnish twins born between 1983 and 1987. All twins (and their parents) were initially contacted and invited to participate by mail in the autumn of the year in which their birth cohort reached 11 years of age. Subsequent follow-up assessments were made

when the twins were aged 14, 17 and ~22 years. The FT16 is a population-based longitudinal study of five consecutive birth cohorts of Finnish twins born between 1975 and 1979. Each pair was initially approached and invited to participate by mail in the 1-2 months following the twins' 16<sup>th</sup> birthday. The baseline data collection started in 1991 and was completed in 1996, with participation of 2733 twin pairs (response rate ~ 88%). Subsequent follow-up assessments were made when the twins were 17, 18.5, and ~25 years, following a similar approach.

For both the FT12 and FT16, the baseline and follow-up assessments included surveys of health habits and attitudes, symptom checklists, personality scales, and social relationships<sup>6</sup>. In addition, blood samples were taken from all twins during a visit to the twin research clinic in Helsinki (Finland) at the last follow-up (young adulthood) for DNA and biochemistry analyses. All biological samples were stored at -80°C at the National Institute for Health and Welfare. Circulating metabolites were determined in 1,269 twins (FT12: n=725, 286MZ and 439DZ; FT16: n=544, 198MZ and 346DZ) using a serum NMR metabolomics platform<sup>7, 8</sup>. Data collection and analysis were approved by the ethics committees of the Department of Public Health of the University of Helsinki, the Helsinki and Uusimaa Hospital District and the IRB of Indiana University. Written informed consent was obtained from all participating twins.

### **Quantitative serum NMR metabolomics**

The serum NMR metabolomics platform applied for metabolite quantification is based on three molecular windows (<sup>1</sup>H NMR spectra) from each serum sample. The lipoprotein data (the LIPO window) and the low-molecular-weight metabolite data (LMWM) are acquired from native serum and the data from individual lipids (LIPID) from serum lipid extracts<sup>9</sup>. The experimental protocol including sample preparation and NMR spectroscopy are described in detail in Inouye *et al.*<sup>8</sup>. Further details of data analyses are briefly presented below.

<sup>1</sup>H NMR is inherently a quantitative technique allowing for absolute metabolite quantification. The multi-metabolic nature of serum inevitably causes signal overlap, however the metabolite content and

concentrations can be extracted by appropriate computational techniques<sup>10</sup>. In the case of the heavily overlapping data of lipoprotein lipids in the LIPO window, we have implemented several lipoprotein subclasses (e.g., VLDL subclasses), as well as other lipoprotein (e.g., HDL-C), and serum lipid (e.g., TGs) quantification models using regression modeling. Prior to metabolite quantification the spectral data undergo pre-processing with automated baseline zeroing, peak alignments and subtraction of the albumin signal background<sup>7</sup>. A simplified and computationally more efficient modification of the approach presented in Vehtari *et al.* is used<sup>11</sup>. All the models used are cross-validated against NMR-independent high-performance liquid chromatography (HPLC) data<sup>12</sup>. Before applying the predictive models, we verify that the new input spectrum lies within the limits ( $\pm 10\%$ ) of the training data set; otherwise, the particular sample is rejected from the subclass analyses with no outcome. The 14 lipoprotein subclass sizes determined by HPLC<sup>12</sup> are as follows: chylomicrons and largest VLDL particles (with particle diameters from 75nm upwards), five different VLDL subclasses, namely, very large VLDL (average particle diameter of 64.0 nm), large VLDL (53.6 nm), medium VLDL (44.5 nm), small VLDL (36.8 nm), and very small VLDL (31.3 nm); IDL (28.6 nm), three LDL subclasses as large LDL (25.5 nm), medium LDL (23.0 nm), and small LDL (18.7); and four HDL subclasses as very large HDL (14.3 nm), large HDL (12.1 nm), medium HDL (10.9 nm), and small HDL (8.7 nm). The mean  $R^2$  between HPLC and NMR cross-validated models for lipoproteins is 0.75 (sd = 0.14). 73 % of the models had  $R^2 > 0.7$ . The mean size for VLDL, LDL, and HDL particles was calculated by weighting the corresponding subclass diameters with their particle concentrations. In this case, IDL particles were included in the measure of mean LDL diameter. Incorporation of the NMR measures (total and HDL cholesterol and total triglycerides) into a recently introduced extended Friedewald approach enabled estimation of apolipoprotein A-I and B as well as HDL<sub>2</sub>-C and HDL<sub>3</sub>-C<sup>13</sup>.

In contrast to the LIPO window, the LMWM and LIPID windows feature sharper line shapes and less spectral overlap, which in turn ease metabolite quantification. Thus, the method of choice to quantify the low-molecular-weight metabolites in the LMWM spectra and the lipid signals in the LIPID spectra is

iterative lineshape fitting analysis. The molecular identity of each metabolite was determined based on multidimensional spectra and literature references of chemical shifts<sup>14</sup>. The PERCH NMR software (Perch Solutions Ltd, Kuopio, Finland) was used in all the lineshape fitting analyses<sup>15</sup>. To account for the variable material loss during the serum lipid extraction procedure and to allow absolute quantification, each metabolite concentration in the LIPID spectrum is scaled via the total cholesterol concentration (from the LIPID spectrum) according to the serum total cholesterol level as quantified from the native serum (i.e., the LIPO spectrum).

### **Conditional analyses**

In order to investigate whether the loci contain additional independent signals further association analyses were performed for loci by conditioning the analyses on the SNP reported in **Tables 2** and **3**, on the previously published SNP or significantly associated variants in the neighboring loci. The analyses using the SNP reported in **Tables 2** and **3** did not reveal additional independent signals except that the chromosome 16 region showed two independent signals. One signal was associated with serum tyrosine levels (rs4788815) and the other signal with the ratio of glycoproteins to total cholesterol (rs34042070 and rs3213423). All SNP associations remained significant after conditioning SNPs on each other. The SNP rs6917603 in the *PPP1R11*-region was conditioned with previously associated SNPs in the region (rs2247056 and rs3177928). The *CPT1A*-locus SNP, rs17610395, was conditioned on rs174547 from the *FADS*-locus.

### **Validation by sequencing**

Nine of the eleven novel loci also showed association in the same region with a marker genotyped in at least 3 cohorts (with  $P < 5 \times 10^{-8}$ ). For the other two loci we aimed to validate the imputed genotypes by sequencing the genomic segment containing the variant in a total of 20 individuals carrying the imputed rare allele and 40 individuals homozygous for the common allele (variants rs17610395 and 17-7083575).

We sequenced PCR products using capillary electrophoresis with an ABI3730xl DNA Analyzer (Applied Biosystems, Foster City, CA) and BigDye v.3.1 sequencing kit (Applied Biosystems).

For rs17610395, we confirmed the presence of the rare allele, either in homozygote or heterozygote form, in 17 out of 19 successful sequencing reactions. One out of 39 individuals, who did not have an imputed heterozygous genotype in our imputed data, proved to be heterozygous after sequencing. For SNP 17-7083575, we confirmed the presence of the rare allele in a heterozygote state in 18 out of 19 imputed rare allele carriers. Three out of 40 individuals, who did not have an imputed heterozygous genotype, proved to be heterozygous after the sequencing of 17-7083575.

### **Heritability estimates**

Heritability estimates were obtained utilizing all of the phenotypic information available from serum NMR metabolomics of the twin pairs. As the distributions of many of the NMR measures were initially highly skewed, they were standardized by age and sex and transformed using rank transformation methods, in R. This data pre-processing both achieved normality and standardized the variables so that the means and variances were independent of age and sex variability. Subsequently, we estimated the heritability of each metabolite measure using standard modeling methods: Univariate genetic models were fitted to the raw data utilizing R software with the specialized “OpenMx” package, and applying full information maximum likelihood methods. For each NMR-based phenotype, models estimating the hypothetical combinations of the different genetic and environmental sources of influence (ACE, ADE, AE, CE and E, where A is the additive genetic influence, C is the shared environmental influence, D is the dominance genetic influence, and E is the unique environmental influence) were built and tested against a saturated model, where no inference on the underlying architecture of the phenotype is assumed. As only data from MZ and DZ twins reared together were available for this study, C and D influences could not be modeled together. The simplest genetic model that fitted the data best was chosen by comparing the fit statistics (likelihood ratio test – LRT, as well as Akaike’s Information Criterion – AIC)

of the hierarchically nested, hypothetical models against that of the saturated model. A non-significant *P*-value from the LRT indicated that the hypothetical sub-model did not fit the data more poorly than the saturated model, while smaller AIC values indicated a better fit to the data. A subset of twins had both enzymatic lipoprotein measures and NMR-measures available. Those were used for the comparison of heritability estimates between enzymatic and NMR methods (**Supplementary Tables 4 and 5**).

## References

1. Inouye, M. *et al.* An immune response network associated with blood lipid levels. *PLoS Genet.* **6**, e1001113 (2010).
2. Yliharsila, H. *et al.* Body mass index during childhood and adult body composition in men and women aged 56-70 y. *Am. J. Clin. Nutr.* **87**, 1769-1775 (2008).
3. Perttola, J. *et al.* OSBPL10, a novel candidate gene for high triglyceride trait in dyslipidemic Finnish subjects, regulates cellular lipid metabolism. *J. Mol. Med.* **87**, 825-835 (2009).
4. Rantakallio, P. Groups at risk in low birth weight infants and perinatal mortality. *Acta Paediatr. Scand.* **193**, Suppl 193:1+ (1969).
5. Raitakari, O. T. *et al.* Cohort profile: the cardiovascular risk in Young Finns Study. *International journal of epidemiology* **37**, 1220-6 (2008).
6. Kaprio, J., Pulkkinen, L. & Rose, R. J. Genetic and environmental factors in health-related behaviors: studies on Finnish twins and twin families. *Twin Res.* **5**, 366-371 (2002).
7. Soininen, P. *et al.* High-throughput serum NMR metabonomics for cost-effective holistic studies on systemic metabolism. *Analyst* **134**, 1781-1785 (2009).
8. Inouye, M. *et al.* Metabonomic, transcriptomic, and genomic variation of a population cohort. *Mol. Syst. Biol.* **6**, 441 (2010).
9. Tukiainen, T. *et al.* A multi-metabolite analysis of serum by <sup>1</sup>H NMR spectroscopy: early systemic signs of Alzheimer's disease. *Biochem. Biophys. Res. Commun.* **375**, 356-361 (2008).
10. Ala-Korpela, M. <sup>1</sup>H NMR spectroscopy of human blood plasma. *Prog Nucl Magn Reson Spectrosc* **27**, 475-554 (1995).
11. Vehtari, A. *et al.* A novel Bayesian approach to quantify clinical variables and to determine their spectroscopic counterparts in <sup>1</sup>H NMR metabonomic data. *BMC Bioinformatics* **8 Suppl 2**, S8 (2007).



12. Okazaki, M. *et al.* Identification of unique lipoprotein subclasses for visceral obesity by component analysis of cholesterol profile in high-performance liquid chromatography. *Arterioscler. Thromb. Vasc. Biol.* **25**, 578-584 (2005).
13. Niemi, J. *et al.* Estimation of VLDL, IDL, LDL, HDL2, apoA-I, and apoB from the Friedewald inputs--apoB and IDL, but not LDL, are associated with mortality in type 1 diabetes. *Ann. Med.* **41**, 451-461 (2009).
14. Wishart, D. S. *et al.* HMDB: the Human Metabolome Database. *Nucleic Acids Res.* **35**, D521-6 (2007).
15. Soininen, P., Haarala, J., Vepsäläinen, J., Niemitz, M. & Laatikainen, R. Strategies for organic impurity quantification by <sup>1</sup>H NMR spectroscopy: Constrained total-line-shape fitting. *Anal. Chim. Acta* **542**, 178-185 (2005).
16. Pietiläinen, K. H. *et al.* Global transcript profiles of fat in monozygotic twins discordant for BMI: pathways behind acquired obesity. *PLoS Med.* **5**, e51 (2008).
17. Newgard, C. B. *et al.* A branched-chain amino acid-related metabolic signature that differentiates obese and lean humans and contributes to insulin resistance. *Cell. Metab.* **9**, 311-326 (2009).
18. Wang, T. J. *et al.* Metabolite profiles and the risk of developing diabetes. *Nat. Med.* (2011).
19. Saier, E. L., Nordstrand, E., Juves, M. W. & Hartsock, R. J. The ratio of free to esterified cholesterol in serum. A new discriminant in correlating lipid metabolism with disease state. *Am. J. Clin. Pathol.* **71**, 83-87 (1979).
20. Steiner, A., Kendall, F. E. & Mathers, J. A. The abnormal serum lipid pattern in patients with coronary arteriosclerosis. *Circulation* **5**, 605-608 (1952).
21. Piperi, C. *et al.* The significance of serum HDL phospholipid levels in angiographically defined coronary artery disease. *Clin. Biochem.* **37**, 377-381 (2004).
22. Chasman, D. I. *et al.* Forty-three loci associated with plasma lipoprotein size, concentration, and cholesterol content in genome-wide analysis. *PLoS Genet.* **5**, e1000730 (2009).
23. Huuskonen, J., Olkkonen, V. M., Jauhiainen, M. & Ehnholm, C. The impact of phospholipid transfer protein (PLTP) on HDL metabolism. *Atherosclerosis* **155**, 269-281 (2001).
24. Wang, L., Folsom, A. R. & Eckfeldt, J. H. Plasma fatty acid composition and incidence of coronary heart disease in middle aged adults: the Atherosclerosis Risk in Communities (ARIC) Study. *Nutr. Metab. Cardiovasc. Dis.* **13**, 256-266 (2003).
25. Rhee, E. P. *et al.* Lipid profiling identifies a triacylglycerol signature of insulin resistance and improves diabetes prediction in humans. *J. Clin. Invest.* **121**, 1402-1411 (2011).
26. Tanaka, T. *et al.* Genome-wide association study of plasma polyunsaturated fatty acids in the InCHIANTI Study. *PLoS Genet.* **5**, e1000338 (2009).

27. Yerlikaya, F. H., Mehmetoglu, I., Kurban, S. & Tonbul, Z. Plasma Fatty Acid composition in continuous ambulatory peritoneal dialysis patients: an increased omega-6/omega-3 ratio and deficiency of essential Fatty acids. *Ren. Fail.* **33**, 819-823 (2011).
